# Supplementary material for: Economic inequalities in burden of illness, diagnosis and treatment of five long-term conditions in England: panel study
Source: PubMed Central journal article supplement — BMJ Open. 2014 Oct 24;4(10):e005530. doi: 10.1136/bmjopen-2014-005530 (PMC4212182; doi:10.1136/bmjopen-2014-005530), 2014-10-24
Supplement: bmjopen-2014-005530.draft_revisions.pdf [file bmjopen-2014-005530.draft_revisions.pdf]

# BMJ Open

## Economic inequalities in burden of illness, diagnosis and treatment of five long-term conditions in England: panel study.

|                                 |                                                                                                                                                                                                                                                                                                                                                                                                                                                                                                                                             |
|---------------------------------|---------------------------------------------------------------------------------------------------------------------------------------------------------------------------------------------------------------------------------------------------------------------------------------------------------------------------------------------------------------------------------------------------------------------------------------------------------------------------------------------------------------------------------------------|
| Journal:                        | <i>BMJ Open</i>                                                                                                                                                                                                                                                                                                                                                                                                                                                                                                                             |
| Manuscript ID:                  | bmjopen-2014-005530                                                                                                                                                                                                                                                                                                                                                                                                                                                                                                                         |
| Article Type:                   | Research                                                                                                                                                                                                                                                                                                                                                                                                                                                                                                                                    |
| Date Submitted by the Author:   | 22-Apr-2014                                                                                                                                                                                                                                                                                                                                                                                                                                                                                                                                 |
| Complete List of Authors:       | Steel, Nicholas; University of East Anglia<br>Hardcastle, Antonia; University of East Anglia, Norwich Medical School<br>Bachmann, Max; Univeristy of East Anglia, School of Medicine, Health Policy and Practic<br>Richards, Suzanne; University of Exeter Medical School,<br>Mounce, Luke; University of Exeter Medical School,<br>Clark, Allan; University of East Anglia, Norwich Medical School<br>Lang, Iain; PenCLAHRC,<br>Melzer, David; University of Exeter Medical School,<br>Campbell, John; University of Exeter, Primary Care; |
| <b>Primary Subject Heading</b>: | Health services research                                                                                                                                                                                                                                                                                                                                                                                                                                                                                                                    |
| Secondary Subject Heading:      | Health services research, Epidemiology, Public health                                                                                                                                                                                                                                                                                                                                                                                                                                                                                       |
| Keywords:                       | Quality in health care < HEALTH SERVICES ADMINISTRATION & MANAGEMENT, EPIDEMIOLOGY, Health policy < HEALTH SERVICES ADMINISTRATION & MANAGEMENT                                                                                                                                                                                                                                                                                                                                                                                             |
|                                 |                                                                                                                                                                                                                                                                                                                                                                                                                                                                                                                                             |

SCHOLARONE™  
Manuscripts

1  
2  
3  
4 **Economic inequalities in burden of illness, diagnosis and**  
5 **treatment of five long-term conditions in England: panel study.**  
6  
7  
8

9  
10 Steel N, Hardcastle A, Bachmann MO, Richards S, Mounce L, Clark A, Lang I, Melzer D,  
11 Campbell J.

12  
13 N Steel, Clinical Senior Lecturer<sup>1</sup>  
14 AC Hardcastle, Senior Research Associate<sup>1</sup>  
15 MO Bachmann, Professor of Health Services Research<sup>1</sup>  
16 S H Richards, Senior Lecturer<sup>2</sup>  
17 LTA Mounce, Research Associate<sup>2</sup>  
18 A Clark, Senior Lecturer<sup>1</sup>  
19 I Lang, Senior Lecturer in Public Health<sup>3</sup>  
20 D Melzer, Professor of Epidemiology and Public Health<sup>2</sup>  
21 J Campbell, Professor of General Practice and Primary Care<sup>2</sup>  
22  
23

24 <sup>1</sup>Population Health and Primary Care, Norwich Medical School, University of East Anglia,  
25 Norwich NR4 7TJ  
26

27 <sup>2</sup>University of Exeter Medical School, Smeall Building, St Luke's Campus, Exeter, EX1 2LU  
28

29 <sup>3</sup>NIHR CLAHRC South West Peninsula, Veysey Building, Salmon Pool Lane, Exeter, EX2  
30 4SG  
31

32  
33 Corresponding author: Nicholas Steel  
34 [n.steel@uea.ac.uk](mailto:n.steel@uea.ac.uk)  
35 01603 591161  
36  
37  
38  
39  
40  
41  
42  
43  
44  
45  
46  
47  
48  
49  
50  
51  
52  
53  
54  
55  
56  
57  
58  
59  
60

## Abstract

### Objective:

We compared the distribution by wealth of self-reported illness burden (estimated from validated scales, biomarker and reported symptoms) for angina, cataract, depression, diabetes and osteoarthritis, with the distribution of self-reported medical diagnosis and treatment. We aimed to determine if the greater illness burden borne by poorer participants was matched by appropriately higher levels of diagnosis and treatment.

### Design:

The English Longitudinal Study of Ageing, a panel study of 12,765 participants aged 50 years and older in four waves from 2004 to 2011, selected using a stratified random sample of households in England. Distribution of illness burden, diagnosis and treatment by wealth was estimated using regression analysis.

### Outcome measures:

The main outcome measures were odds ratios (ORs) for the illness burden, diagnosis and treatment respectively, adjusted for age, sex and wealth. We estimated the illness burden for angina with the Rose Angina scale, diabetes with fasting glycosylated haemoglobin, depression with the Centre for Epidemiologic Studies Depression Scale, osteoarthritis with self-reported pain and disability, and cataract with self-reported poor vision. Medical diagnoses were self-reported for all conditions. Treatment was defined as beta-blocker prescription for angina, surgery for osteoarthritis and cataract, and receipt of pre-defined effective interventions for diabetes and depression.

### Results:

Compared to the wealthiest, the least wealthy participant had substantially higher odds for illness burden from any of the five conditions at all four time points, with odds ratios ranging from 4.2 (95% confidence interval 2.6 to 6.8) for diabetes to 15.1 (11.4 to 20.0) for osteoarthritis. The odds ratios for diagnosis and treatment were smaller in all 5 conditions, and ranged from 0.9 (0.5 to 1.4) for diabetes treatment to 4.5 (3.3 to 6.0) for angina diagnosis.

### Conclusions:

The substantially higher illness burden in less wealthy participants was not matched by appropriately higher levels of diagnosis and treatment.

## Strengths and limitations of this study

- The English Longitudinal Study of Ageing (ELSA) is a unique single source of detailed longitudinal data on socioeconomic status and health, and this is the first study to compare inequalities in illness burden, medical diagnosis and treatment of long-term conditions on the same population over time
- Highly detailed measures of individual wealth were used alongside standardised scales and blood biomarker to assess the illness burden of depression, angina and diabetes
- Standardised scales were not included in ELSA for osteoarthritis and cataract, so assessment of illness burden for these two conditions was based on attributed symptoms which were not specific for osteoarthritis and cataract
- The study used self-reported data collected using an extensively tested structured questionnaire, but no information from medical records was collected
- An analysis of pooled data from 4 waves of ELSA was used to maximise the sample size, and the main finding that less wealthy participants are relatively underdiagnosed requires validation in a larger longitudinal study.

## Main text

### Introduction

Poverty is associated with poor health, poor access to health care and poor health outcomes in many countries and across different health care systems<sup>1-3</sup>. Much of this variation is caused by recognised broad social determinants of health<sup>4</sup>. Considerable political effort has been directed at attempts to narrow health inequalities by reducing poverty and social exclusion. However, as health care has become more effective at improving health, its potential contribution to ameliorating health inequalities has increased. McKeown demonstrated in the 1970s that health services had contributed little to health improvement<sup>5</sup>, but the same claim could not be made today. The past 30 years have seen the introduction of a wide range of effective interventions, particularly for the prevention and management of chronic disease<sup>6</sup>. Yet although these new interventions improve health, they are not necessarily applied equally across the population. Health inequalities will widen if effective services are offered, or taken up, with greater frequency by wealthier than less wealthy people. The reverse is also true, however, and there is an opportunity for healthcare to reduce social inequalities if it reaches those most in need<sup>7</sup>.

Little is known about pathways into poor health. The National Health Service provides medical care free at point-of-need to all UK residents, but there is scope for inequalities to occur in the pathway from identification of early symptoms through diagnosis and on to effective treatment. Individuals in more deprived social groups may be more reluctant to present to doctors with their symptoms and so may not receive a diagnosis<sup>8,9</sup>. Diagnosis is a key step that has meaning for both patient and physician in all health systems, and ‘diagnostic confusion’ may act as a barrier to health care for vulnerable populations<sup>10,8,11</sup>. Previous studies have found socio-economic variation in either diagnosis or treatment rates, but have not been able to compare inequalities in illness burden, rates of diagnosis and treatment modalities in the same population<sup>12-14</sup>.

The English Longitudinal Study of Ageing (ELSA) provides new data that can be used to identify barriers to equitable receipt of healthcare, and constitutes a unique source of information on illness burden, diagnosis and treatment. Other data sources cover symptoms, or diagnosis, or treatment, but no other single source covers all three. ELSA collects data on symptoms and validated markers of common health conditions, as well as diagnosis and treatment. It also contains detailed socio-demographic information, including direct measures of personal wealth, on a sample selected to be representative of the population of England aged 50 years and older. These data can be used to compare socio-economic inequalities for several conditions, providing insight into a healthcare system with no direct financial barriers to treatment (the National Health Service in England). We aimed to assess socio-economic inequalities in the burden of illness (estimated by validated scales, biomarker, and reported symptoms) of angina, cataract, depression, diabetes and osteoarthritis, and compare them with inequalities in reported medical diagnosis and treatment, in order to determine whether key components of health care were received equitably.

### Methods

We obtained data from the ELSA cohort, an interview survey of a sample of the population aged 50 years or older in England<sup>15</sup>. Participants are interviewed in their homes or care homes every two years about a wide range of health, economic and social topics. We used

1  
2  
3 data collected from core participants who had been interviewed in any of four waves of  
4 ELSA from wave 2 in 2004-5 until wave 5 in 2010-11. Wave 2 was the first wave to include  
5 questions on receipt of quality-indicated healthcare, and information was not collected on  
6 every variable in every wave. Ethical approval was received from the London Multi-Centre  
7 Research Ethics Committee. We studied five common and important long-term conditions:  
8 angina, diabetes, depression, osteoarthritis, and cataract. Effective treatment is freely  
9 available for all five conditions from the National Health Service.  
10

### 11 **Variables**

12 We collected data on illness burden, medical diagnosis and treatment of angina, cataract,  
13 depression, diabetes and osteoarthritis. The illness burden for angina was defined as grade 2  
14 on the Rose Angina scale (pain or discomfort in chest when walking at an ordinary pace on  
15 the level on most occasions or more often, which makes subject stop or slow down if occurs  
16 while walking, and which then goes away within 10 minutes, and which includes either  
17 sternum (any level), or left arm and left anterior chest). Illness burden for diabetes was  
18 defined as a fasting HbA1c level of >7.5%<sup>16</sup>. Illness burden for depression was defined as a  
19 score of 3 or more on the eight-item Centre for Epidemiologic Studies Depression Scale  
20 (CES-D). The application of these standardised scales in ELSA has been described  
21 previously<sup>1</sup>. Illness burden for osteoarthritis was defined as self-reported pain in the hip or  
22 knee of 5 or more on a scale of 0 to 10<sup>17</sup>. Illness burden for cataract was defined broadly as  
23 reporting poor vision or blindness. Cataract is responsible for about a quarter of poor vision  
24 in the UK, so this measure is the least specific and includes those with other causes of poor  
25 vision, such as age-related macular degeneration, which is responsible for about a third of  
26 poor vision<sup>18;19</sup>.  
27  
28  
29

30  
31 A medical diagnosis was considered to exist if a participant answered 'yes' when asked  
32 whether a doctor had ever told them they had the condition of interest. For arthritis, a follow-  
33 up question asked whether they had been told they had osteoarthritis, rheumatoid or other  
34 arthritis.  
35

36 Treatment for depression and diabetes was defined by reported achievement of quality of care  
37 indicators, derived through a robust process of literature reviews, expert panel assessment and  
38 piloting<sup>20;21</sup>. For depression, the quality indicator was about receipt of treatment since the  
39 previous wave: *'if a person is diagnosed with clinical depression, then antidepressive  
40 treatment, talking treatment or electroconvulsive treatment should be offered within 2 weeks  
41 after diagnosis unless within that period the patient has improved, or unless the patient has  
42 substance abuse or dependence, in which case treatment may wait until 8 weeks after the  
43 patient is in a drug-or alcohol-free state'*. For diabetes, treatment was measurement of  
44 glycosylated haemoglobin or fructosamine levels in the preceding 12 months. Treatment for  
45 angina was defined as ever being offered or currently taking beta-blockers (ELSA variables  
46 hebeta or hebetb). Treatment for osteoarthritis and cataract were defined as reporting ever  
47 having had surgery for the condition. For osteoarthritis this excluded those with hips or knees  
48 replaced due to fracture. Data on hip and knee replacements were only available for  
49 respondents aged 60 and over, and so respondents aged less than 60 years (n= 3,186) were  
50 excluded from the analysis of osteoarthritis.  
51  
52

53  
54 Wealth was defined as the sum of financial, physical and housing wealth plus state and  
55 private pension income. Age was categorised into three groups, 50-59 years, 60-74 years and  
56 75 years and older.  
57  
58  
59  
60

## Analysis

We used two approaches to analysis, a main analysis using serial cross sectional data and then a subsidiary analysis using longitudinal data. Multivariable binomial regression analysis was used, with the outcome variables defined as one of illness burden, medical diagnosis or treatment for each of the five conditions in each cross-sectional wave (STATA statistical software version 12.1). This regression analysis was repeated for each of the four waves of ELSA from 2004 to 2011 separately and then 'overall' for all four waves combined. For the 'overall' analysis, the data were reshaped into 'long' format in Stata statistical software, with each participant having a separate record for each wave. Intra-person correlation of outcomes was accounted for using robust adjustment with Stata, with each participant's unique identifier included in the regression equation as a cluster variable. Missing data were excluded from the analyses.

The independent variables were age group, sex and slope order of inequality. We used the slope order of inequality as an independent variable to estimate the relationship between the outcome measures and the categorised measure of wealth<sup>22,23</sup>. The slope order of inequality consisted of wealth quintiles with values of 0.1, 0.3, 0.5, 0.7 and 0.9, that is, the midpoints of each quintile on a scale of zero (least wealthy) to one (most wealthy). The slope order of inequality was modelled as a continuous variable, and its odds ratio represents the ratio of the least wealthy compared with the wealthiest participant. This odds ratio is also known as a relative index of inequality<sup>22</sup>. Advantages of this method of quantifying inequality are that it includes all participants, instead of just comparing the highest and lowest quintiles, it accounts for the number of participants in each category and it provides a single overall measure of inequality.

We included all participants in the main cross sectional analysis in order to compare the distribution of illness burden in the whole population with the distributions of diagnoses and treatments in the whole population. This meant that diagnosis was assessed even in those who did not meet the criteria for 'illness burden', and treatment was assessed even in those with no diagnosis. For the subsidiary analysis using longitudinal data, we estimated the odds ratio of receiving a diagnosis by a subsequent wave only for those who had met the criteria for 'illness burden' in a previous wave, and then the likelihood of receiving treatment only for those who had received a diagnosis in a previous wave. This was a subsidiary analysis as the numbers of participants that could be followed over time in this manner was small, particularly for treatment in angina and depression.

## Results

The whole sample (n=12,765) was composed of participants aged 50 years or more who had responded to at least one wave of ELSA from 2004-5 until 2010-11. The response rate in 2004-5 was 82%.<sup>24,25</sup> Over half were women, or aged between 60 and 74 years (Table 1). Medical diagnosis for all five conditions increased as wealth decreased, for example in depression from 4% in the wealthiest quintile to 11% in the poorest (Table 1). There was little variation between the waves for each of the five conditions (Table 2).

The hypothetically least wealthy participant had substantially higher odds than the hypothetically most wealthy of meeting the criteria for 'illness burden' from any of the five conditions at all four time points (overall odds ratios (OR) ranged from 4.2 to 15.1) (Table 3). The least wealthy participant also had higher odds of diagnosis (ORs 1.1 to 4.5) and either no different or relatively small odds of treatment (ORs 0.9 to 2.6) (Table 3, Figure 1).

For angina, the overall odds ratio for meeting the criteria for 'illness burden' was 7.6, indicating that the hypothetically least wealthy individual was seven times more likely to have angina symptoms (defined by the Rose angina scale) than the wealthiest. The odds ratio for reported medical diagnosis was 4.5, suggesting that some less wealthy people with angina symptoms had not received a diagnosis of angina, as the expected odds ratio for equitably distributed diagnosis would have been 7.6. The odds ratio for treatment was 3.2, and again the expected odds ratios for equitably distributed treatment would have been 7.6. For depression, the overall odds ratio for illness burden was 6.4, for medical diagnosis was 3.3, and for treatment was 2.6, again suggesting that some poorer people with symptoms of depression were less likely to have received a diagnosis or indicated health care, as the expected odds ratios for equitably distributed treatment would have been 6.4.

For diabetes, the overall odds ratio for illness burden was 4.2 and 4.0 for diagnosis, suggesting that for diabetes diagnosis was distributed equitably. However, the odds ratio for treatment was 0.9 and not statistically significantly different from 1, again suggesting that some less wealthy people with medically diagnosed diabetes had not received treatment, as the expected odds ratios for equitably distributed treatment would have been 4.2.

The subsidiary analysis calculated the odds ratios of receiving a diagnosis by a subsequent wave only for those who had met the criteria for 'illness burden' for the relevant long term condition in a previous wave; and then the likelihood of receiving treatment only for those who had received a medical diagnosis in a previous wave. The substantial inequalities in the illness burden of conditions by wealth are identical to Table 3, as expected, and subsequently the numbers of eligible participants dwindle rapidly due to the nested nature of the analysis, with some wide confidence intervals and 9 out of 10 results not statistically significant (Supplemental file 1).

**Table 1:** Characteristics of ELSA participants at wave 5 (2010-11) and medical diagnosis of angina, cataract, depression, diabetes and osteoarthritis.

|                  |         | Whole sample | Angina | Cataract | Depression | Diabetes | Osteoarthritis |
|------------------|---------|--------------|--------|----------|------------|----------|----------------|
|                  |         | N            | %      | %        | %          | %        | %              |
| Sex              | Male    | 3,886        | 8.2    | 13.4     | 5.4        | 13.3     | 19.8           |
|                  | Female  | 4,843        | 6.3    | 20.4     | 7.8        | 9.4      | 32.9           |
| Age (years)      | 50-59   | 1,906        | 2.2    | 3.7      | 10.1       | 7.2      | 17.1           |
|                  | 60-74   | 4,766        | 5.8    | 14.5     | 7.0        | 11.0     | 28.1           |
|                  | 75+     | 2,057        | 15.0   | 36.6     | 2.9        | 15.0     | 34.1           |
| Wealth quintile* | 1       | 1,716        | 3.4    | 13.8     | 4.1        | 6.0      | 21.5           |
|                  | 2       | 1,714        | 4.9    | 15.5     | 5.9        | 8.0      | 24.2           |
|                  | 3       | 1,723        | 6.6    | 20.1     | 5.7        | 11.3     | 25.7           |
|                  | 4       | 1,716        | 8.2    | 18.6     | 6.7        | 13.6     | 31.6           |
|                  | 5       | 1,715        | 12.9   | 19.2     | 11.5       | 16.7     | 33.1           |
|                  | missing | 145          | 5.5    | 9.7      | 4.8        | 9.7      | 20.0           |
| Total            |         | 8,729        | 7.2    | 17.3     | 6.7        | 11.1     | 27.1           |

\*1=wealthiest quintile, 5=least wealthy quintile



**Table 2.** Illness burden, medical diagnosis, and treatment for angina, cataract, depression, diabetes and osteoarthritis in four waves of ELSA

|                                                                                                       | <b>Angina</b><br>N (%) | <b>Cataract</b><br>N (%) | <b>Depression</b><br>N (%) | <b>Diabetes</b><br>N (%) | <b>Osteoarthritis</b><br>N (%) |
|-------------------------------------------------------------------------------------------------------|------------------------|--------------------------|----------------------------|--------------------------|--------------------------------|
| <b>Illness burden</b>                                                                                 |                        |                          |                            |                          |                                |
| Wave 2 (2004-5)                                                                                       | 397 (4.6)              | 308 (3.5)                | 2,037 (23.4)               | 160 (1.8)                | 1,106 (12.7)                   |
| Wave 3 (2006-7)                                                                                       | 300 (3.6)              | 317 (3.8)                | 1,929 (23.3)               | n/a                      | 917 (11.1)                     |
| Wave 4 (2008-9)                                                                                       | 300 (3.1)              | 331 (3.5)                | 2,049 (21.4)               | 220 (2.3)                | 1,088 (11.4)                   |
| Wave 5 (2010-11)                                                                                      | 254 (2.9)              | 320 (3.7)                | 1,956 (22.4)               | n/a                      | 1,046 (12.0)                   |
| <b>Medical diagnosis</b>                                                                              |                        |                          |                            |                          |                                |
| Wave 2 (2004-5)                                                                                       | 668 (7.6)              | 1,050 (12.1)             | 402 (4.6)                  | 715 (8.2)                | 1,861 (21.4)                   |
| Wave 3 (2006-7)                                                                                       | 591 (7.1)              | 1,294 (15.7)             | 490 (5.9)                  | 935 (11.3)               | 1,952 (23.6)                   |
| Wave 4 (2008-9)                                                                                       | 645 (6.7)              | 1,421 (14.8)             | 601 (6.3)                  | 1,215 (12.7)             | 2,262 (23.6)                   |
| Wave 5 (2010-11)                                                                                      | 655 (7.5)              | 1,566 (17.9)             | 602 (6.9)                  | 1,413 (16.2)             | 2,416 (27.7)                   |
| <b>Treatment</b>                                                                                      |                        |                          |                            |                          |                                |
| Wave 2 (2004-5)                                                                                       | 85 (1.0)               | 535 (6.2)                | 98 (1.1)                   | 552 (6.4)                | 202 (2.3)                      |
| Wave 3 (2006-7)                                                                                       | n/a                    | 379 (4.9)                | n/a                        | 618 (7.5)                | 141 (1.7)                      |
| Wave 4 (2008-9)                                                                                       | n/a                    | 444 (4.6)                | 155 (1.6)                  | 671 (7.0)                | 226 (2.4)                      |
| Wave 5 (2010-11)                                                                                      | 88 (1.0)               | 646 (7.4)                | n/a                        | 748 (8.6)                | 208 (2.4)                      |
| Total number of participants in each wave: wave 2: 8,688; wave 3: 8,268; wave 4: 9,578; wave 5: 8,729 |                        |                          |                            |                          |                                |
| n/a = data not available for that condition in that wave                                              |                        |                          |                            |                          |                                |

**Table 3.** Illness burden, medical diagnosis and treatment of angina, cataract, depression, diabetes and osteoarthritis, comparing the least wealthy with the most wealthy: binomial regression.

|                                       |                   | Angina                    | Cataract                  | Depression               | Diabetes                 | Osteoarthritis              |
|---------------------------------------|-------------------|---------------------------|---------------------------|--------------------------|--------------------------|-----------------------------|
| Odds ratios (95% confidence interval) |                   |                           |                           |                          |                          |                             |
| Wave 2*<br>(2004-5)                   | Illness burden    | <b>5.6</b><br>(3.8, 8.3)  | <b>7.2</b><br>(4.5, 11.5) | <b>5.1</b><br>(4.3, 6.2) | <b>4.4</b><br>(2.5, 8.0) | <b>11.0</b><br>(8.1, 14.9)  |
|                                       | Medical diagnosis | <b>2.9</b><br>(2.2, 3.9)  | <b>1.3</b><br>(1.0, 1.6)  | <b>4.8</b><br>(3.3, 7.0) | <b>3.1</b><br>(2.3, 4.2) | <b>1.6</b><br>(1.3, 2.0)    |
|                                       | Treatment         | <b>2.6</b><br>(1.2, 5.7)  | <b>1.5</b><br>(1.0, 2.2)  | 0.6<br>(0.1, 2.9)        | 0.7<br>(0.3, 1.5)        | 1.1<br>(0.7, 1.9)           |
| Wave 3*<br>(2006-7)                   | Illness burden    | <b>8.7</b><br>(5.5, 13.8) | <b>8.2</b><br>(5.1, 13.1) | <b>6.9</b><br>(5.7, 8.5) |                          | <b>12.7</b><br>(9.1, 17.8)  |
|                                       | Medical diagnosis | <b>4.9</b><br>(3.6, 6.8)  | <b>1.2</b><br>(1.0, 1.5)  | 0.7<br>(0.4, 1.4)        | <b>3.4</b><br>(2.6, 4.4) | <b>0.6</b><br>(0.4, 0.8)    |
|                                       | Treatment         |                           | 1.3<br>(0.8, 1.9)         |                          | 1.2<br>(0.6, 2.4)        | 1.0<br>(0.6, 1.9)           |
| Wave 4*<br>(2008-9)                   | Illness burden    | <b>6.7</b><br>(4.2, 10.5) | <b>5.5</b><br>(3.6, 8.6)  | <b>5.9</b><br>(4.9, 7.1) | <b>3.9</b><br>(2.4, 6.4) | <b>14.0</b><br>(10.3, 19.1) |
|                                       | Medical diagnosis | <b>4.3</b><br>(3.2, 5.9)  | 1.1<br>(0.9, 1.4)         | 0.7<br>(0.4, 1.2)        | <b>3.9</b><br>(3.1, 5.1) | <b>0.6</b><br>(0.4, 0.8)    |
|                                       | Treatment         |                           | 1.1<br>(0.7, 1.6)         | <b>2.4</b><br>(1.0, 5.9) | <b>0.2</b><br>(0.1, 0.6) | 1.0<br>(0.6, 1.6)           |
| Wave 5*<br>(2010-11)                  | Illness burden    | <b>8.4</b><br>(5.1, 13.7) | <b>6.2</b><br>(3.9, 9.9)  | <b>5.9</b><br>(4.8, 7.1) |                          | <b>16.0</b><br>(11.7, 21.8) |
|                                       | Medical diagnosis | <b>5.3</b><br>(3.9, 7.3)  | <b>1.3</b><br>(1.0, 1.5)  | <b>1.7</b><br>(1.0, 2.8) | <b>4.3</b><br>(3.4, 5.4) | <b>0.6</b><br>(0.4, 0.8)    |
|                                       | Treatment         | <b>3.3</b><br>(1.5, 7.3)  | <b>1.8</b><br>(1.2, 2.6)  |                          | 0.8<br>(0.4, 1.6)        | 1.2<br>(0.7, 2.0)           |
| Overall†                              | Illness burden    | <b>7.6</b><br>(5.4, 10.8) | <b>8.0</b><br>(5.4, 11.9) | <b>6.4</b><br>(5.5, 7.5) | <b>4.2</b><br>(2.6, 6.8) | <b>15.1</b><br>(11.4, 20.0) |
|                                       | Medical diagnosis | <b>4.5</b><br>(3.3, 6.0)  | <b>1.3</b><br>(1.1, 1.5)  | <b>3.3</b><br>(2.4, 4.5) | <b>4.0</b><br>(3.1, 5.2) | 1.1<br>(0.9, 1.3)           |
|                                       | Treatment         | <b>3.2</b><br>(1.7, 6.0)  | <b>1.3</b><br>(1.0, 1.8)  | <b>2.6</b><br>(1.1, 6.1) | 0.9<br>(0.5, 1.4)        | 1.2<br>(0.8, 1.6)           |

\*Odds ratios adjusted for age group and sex

†Odds ratios adjusted for age group, sex and unique participant identifier

\*\*Analyses for osteoarthritis excluded those younger than 60 years, as data on osteoarthritis treatment were only collected in those aged 60 or over.

Odds ratios where the 95% confidence intervals do not include 1 (before rounding to one decimal place) are shown in bold

**Figure 1.** Illness burden, medical diagnosis, and treatment of angina, cataract, depression, diabetes and osteoarthritis, comparing the least wealthy with the most wealthy: Overall odds ratios (adjusted for age and sex) and 95% confidence bars (binomial regression)

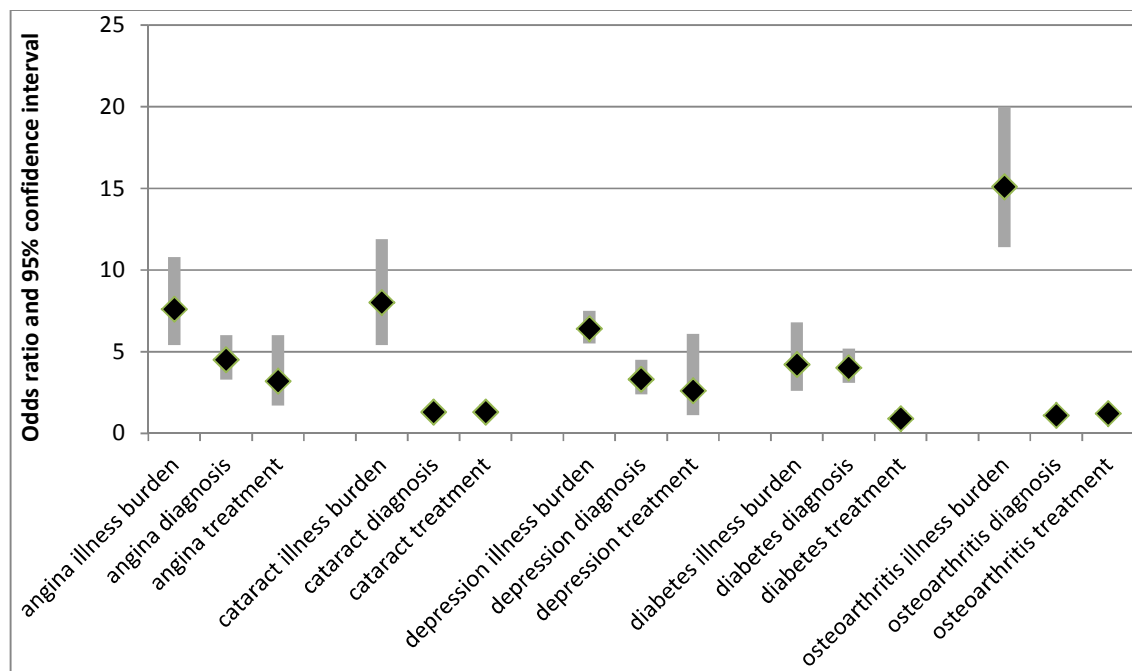

## Discussion

We found that while there were strong inverse associations between wealth and the burden of illness (based on validated scales, symptoms and biomarker) of a long-term condition, there were smaller or absent inequalities in receipt of self-reported medical diagnosis or treatment for the conditions considered. This suggests that the substantially higher illness burden in less wealthy participants was not matched by appropriately higher levels of diagnosis and treatment, and that equitable receipt of a medical diagnosis may have an important role in reducing inequalities in health.

ELSA is a unique single source of detailed longitudinal data on socioeconomic status and health, and this is the first study to compare inequalities in illness burden, medical diagnosis and treatment of long-term conditions on the same population over time. ELSA used robust measures of individual socio-economic position, and standardised scales and blood biomarkers to assess health status. This exploratory study has some limitations and the results should be interpreted with caution and tested in subsequent research. Whilst standardised measures were used to estimate the illness burden of depression, angina and diabetes, symptoms alone were used for osteoarthritis and cataract, and the attributed symptoms were not specific for osteoarthritis and cataract. However, this lack of specificity is unlikely to vary with wealth, and so is not likely to be an important source of bias. Self-reported data may be a source of bias if self-report varies by factors other than objective health status, such as wealth or social experience. This is a recognised problem with some self-reported morbidity data, but is less of a problem with measures of pain, where self-report is the best means of assessment<sup>26</sup>.

1  
2  
3  
4 We have not adjusted for health-related factors that are also more prevalent in poorer  
5 populations, such as smoking, obesity and comorbidity, because none of these are a reason  
6 for not making a diagnosis. Comorbid conditions are commoner in those with lower socio-  
7 economic status, but there is no evidence that comorbidities make a new diagnosis less likely.  
8 On the contrary, a higher number of comorbid conditions in older people may be associated  
9 with higher quality of care<sup>27</sup>. We found different patterns in different conditions, which fits  
10 with other research showing that wealth acts differently in different conditions, and for  
11 example, has no association with referral for post-menopausal bleeding<sup>28</sup>. Major national  
12 policy interventions such as the Quality and Outcomes Framework payment for performance  
13 scheme in primary care<sup>29</sup> have been associated with improved healthcare for included  
14 conditions such as angina and diabetes, more than for excluded conditions such as osteoarthritis  
15 and poor vision<sup>30-32</sup>.

16  
17  
18 The serial cross-sectional analysis of 4 waves of ELSA included all eligible participants in  
19 each wave in order to maximise the sample size. This approach meant that some participants  
20 with a diagnosed condition would no longer have had symptoms or raised biomarkers, if they  
21 were being successfully treated. Examples would be diabetic participants whose blood sugar  
22 levels were being successfully controlled by treatment, and participants with successfully  
23 treated depression. We therefore checked our main results with the secondary (longitudinal)  
24 analysis, which assessed subsequent diagnosis in those had met the criteria for ‘illness  
25 burden’, and subsequent treatment in those with a medical diagnosis, but the number of  
26 participants who could be followed through the waves in this way was too small to allow  
27 meaningful conclusions to be drawn from the results.  
28  
29

30  
31 Our results fit with previous findings that a greater proportion of people in deprived groups  
32 had Rose angina, but there was no difference in the proportions receiving a general  
33 practitioner diagnosis of coronary heart disease<sup>14</sup>. Care-seeking behaviour and patient  
34 preferences may differ with wealth. Given the same information, patients may want fewer  
35 medical interventions than their doctors recommend<sup>33;34</sup> and pessimism about availability of  
36 treatment may make older people reluctant to seek help<sup>35</sup>. Older people may view living with  
37 symptoms (such as pain, or emotional problems) as a normal part of ageing<sup>36</sup>. The response  
38 of the primary care physician may also vary with the wealth of the patient. For example, the  
39 physician might be more likely to consider symptoms of breathlessness as a medical problem  
40 requiring a diagnosis, whereas aches and pains, poor vision, and low mood might be  
41 considered part of the tapestry of life, or the natural ageing process. Comorbidity is more  
42 common in deprived populations, and may make diagnosis of all conditions harder for  
43 doctors within the constraints of a short consultation<sup>37</sup>.  
44  
45

46 At a system level, the results may be partially explained by wealthier people living in areas  
47 where there are more healthcare resources. Wennberg introduced the concept of ‘supply-  
48 sensitive care’ to describe how the quantity of healthcare resources allocated to a particular  
49 population was a major determinant of the frequency of use of health services by that  
50 population, and gives an example in which ‘a doubling of the supply of internists or  
51 cardiologists results in roughly a halving of the interval between repeat visits’<sup>38;39</sup>. Where  
52 healthcare resources are relatively plentiful, patients with chronic diseases will consult more,  
53 use more diagnostic tests, and be referred to hospital more. Further research could helpfully  
54 investigate whether those missing out on diagnosis are not accessing health services, or are  
55 seeing a doctor but not being diagnosed. The participants were selected to be nationally  
56 representative of the population of England, and so the findings are likely to be generalisable  
57  
58  
59  
60

1  
2  
3 to England, but not to countries with different healthcare systems. If validated, our findings  
4 that inequalities in receipt of diagnoses are potential barriers to equitable healthcare for five  
5 common long-term conditions, suggest that future policy interventions to reduce socio-  
6 economic inequalities in healthcare should consider improving access to diagnosis as well as  
7 treatment.  
8

9  
10  
11  
12  
13 **Funding statement:** This article presents independent research commissioned by the UK  
14 National Institute for Health Research (NIHR) under the Health Services Research  
15 programme: HSR Project 10/2002/06 – ‘The dynamics of quality: a national panel study of  
16 evidence-based standards’. IL’s work was supported by the NIHR Collaboration for Applied  
17 Health Research and Care (CLAHRC) for the South West Peninsula. The views expressed in  
18 this publication are those of the authors and not necessarily those of the NHS, the NIHR or  
19 the Department of Health.  
20

21  
22 **Competing interests:** All authors have completed the ICMJE uniform disclosure form at  
23 [www.icmje.org/coi\\_disclosure.pdf](http://www.icmje.org/coi_disclosure.pdf) and declare: all authors had financial support from the  
24 National Institute for Health Research for the submitted work, DM had financial support from  
25 Age UK; no financial relationships with any organisations that might have an interest in the  
26 submitted work in the previous three years; no other relationships or activities that could  
27 appear to have influenced the submitted work.  
28

29  
30 **Ethics approval:** The English Longitudinal Study of Ageing received ethics approval from  
31 the National Research Ethics Service: 09/H0505/124. Participants gave informed consent  
32 before taking part.  
33

34 **Contributors:** NS contributed to the study design, oversaw data analysis and interpretation,  
35 and drafted the paper. NS is guarantor. AH undertook data preparation, analysis and  
36 interpretation, and contributed to drafting the paper. LM undertook data preparation and  
37 analysis. MB and AC advised on statistical techniques. SR, JC and IL advised on data  
38 analysis and interpretation. DM contributed to the study design and advised on data analysis  
39 and interpretation. All authors contributed to data interpretation and revised the paper  
40 critically. Dave Stott and Amander Wellings, representatives of Public and Patient  
41 Involvement in Research (PPIRes), brought a helpful lay perspective to this research.  
42  
43

44 **Data sharing:** The ELSA dataset and technical documentation are available from the UK  
45 Data Service at: <http://discover.ukdataservice.ac.uk/catalogue?sn=5050>.  
46  
47  
48  
49  
50  
51  
52  
53  
54  
55  
56  
57  
58  
59  
60

## Reference List

- 1  
2  
3  
4  
5 (1) Marmot M, Banks J, Blundell R, Lessof C, Nazroo J. Health, Wealth and Lifestyles of  
6 the Older Population in England: the 2002 English Longitudinal Study of Ageing.  
7 London: The Institute for Fiscal Studies; 2003.  
8
- 9  
10 (2) Börsch-Supan A, Brugiavini A, Jürges H, Mackenbach J, Siegris J, Weber G. Health,  
11 Ageing and Retirement in Europe. First Results from the Survey of Health, Ageing  
12 and Retirement in Europe. Mannheim: Mannheim Research Institute for the  
13 Economics of Aging (MEA); 2005.  
14
- 15 (3) Hemingway H, Shipley M, Macfarlane P, Marmot M. Impact of socioeconomic status  
16 on coronary mortality in people with symptoms, electrocardiographic abnormalities,  
17 both or neither: the original Whitehall study 25 year follow up. *J Epidemiol  
18 Community Health* 2000; 54(7):510-516.  
19
- 20 (4) Wilkinson R, Marmot M. Social determinants of health: the solid facts. 2nd edition  
21 ed. Copenhagen: World Health Organisation; 2003.  
22
- 23 (5) McKeown T. The role of medicine: dream, mirage or nemesis? 1 ed. London:  
24 Nuffield Principal Hospital Trust; 1976.  
25
- 26 (6) Bunker JP. The role of medical care in contributing to health improvements within  
27 societies. *Int J Epidemiol* 2001; 30(6):1260-1263.  
28
- 29 (7) Watt G. The inverse care law today. *Lancet* 2002; 360:252-4.  
30
- 31 (8) Richards HM, Reid ME, Watt GCM. Socioeconomic variations in responses to chest  
32 pain: qualitative study. *BMJ* 2002; 324(7349):1308.  
33
- 34 (9) Gardner K, Chapple A. Barriers to referral in patients with angina: qualitative study.  
35 *BMJ* 1999; 319(7207):418-421.  
36
- 37 (10) Berger J, Mohr J. A fortunate man: the story of a country doctor. London: Penguin;  
38 1967.  
39
- 40 (11) Tod AM, Read C, Lacey A, Abbott J. Barriers to uptake of services for coronary heart  
41 disease: qualitative. *BMJ* 2001; 323(7306):214.  
42
- 43 (12) Chaturvedi N, Ben Shlomo Y. From the surgery to the surgeon: does deprivation  
44 influence consultation and operation rates? *Br J Gen Pract* 1995; 45(392):127-131.  
45
- 46 (13) Mahomed NN, Barrett JA, Katz JN, Phillips CB, Losina E, Lew RA et al. Rates and  
47 outcomes of primary and revision total hip replacement in the United States medicare  
48 population. *J Bone Joint Surg Am* 2003; 85-A(1):27-32.  
49
- 50 (14) Richards H, McConnachie A, Morrison C, Murray K, Watt G. Social and gender  
51 variation in the prevalence, presentation and general practitioner provisional diagnosis  
52 of chest pain. *J Epidemiol Community Health* 2000; 54(9):714-718.  
53
- 54 (15) Natcen Social Research. English Longitudinal Study of Ageing (ELSA) Wave One to  
55 Wave Five User Guide. <http://www.esds.ac>  
56  
57  
58  
59  
60

uk/doc/5050/mrdoc/pdf/5050\_User\_Guide\_to\_the\_ELSA\_Datasets\_Waves\_1\_to\_5  
pdf [ 2012 [cited 2013 Sept. 28];

- (16) Scholes S, Taylor R, Cheshire H, Cox K, Lessof C. Retirement, health and relationships of the older population in England: The 2004 English Longitudinal Study of Ageing. Technical Report P2808. London: National Centre for Social Research; 2008.
- (17) Steel N, Melzer D, Gardener E, McWilliams B. Need for and receipt of hip and knee replacement--a national population survey. *Rheumatology* 2006;(45):1437-1441.
- (18) Evans JR, Fletcher AE, Wormald RPL, Siu-Woon Ng E, Sterling S, Smeeth L et al. Prevalence of partial sight and blindness in people aged 75 years and older in Britain: results from the MRC trial of assessment and management of older people in the community. *Br J Ophthalmol* 2002; 86:795-800.
- (19) Congdon N, O'Colmain B, Klaver CCW, Klein R, Munoz B, Friedman DS et al. Causes and Prevalence of Partial sight and blindness among adults in the United States. *Arch Ophthalmol* 2004; 122:477-485.
- (20) Steel N, Melzer D, Shekelle PG, Wenger NS, Forsyth D, McWilliams BC. Developing quality indicators for older adults: transfer from the USA to the UK is feasible. *Quality and Safety in Health Care* 2004; 13(4):260-264.
- (21) Steel N, Bachmann M, Maisey S, Shekelle P, Breeze E, Marmot M et al. Self reported receipt of care consistent with 32 quality indicators: National population survey of adults aged 50 or more in England. *BMJ* 2008; 337:a957.
- (22) Wagstaff A, Paci P, Van Doorslaer E. On the measurement of inequalities in health. *Soc Sci Med* 1991; 33(5):545-557.
- (23) Bachmann MO, Eachus J, Hopper CD, Davey SG, Propper C, Pearson NJ et al. Socio-economic inequalities in diabetes complications, control, attitudes and health service use: a cross-sectional study. *Diabet Med* 2003; 20(11):921-929.
- (24) Banks J, Breeze E, Lessof C, Nazroo J. Retirement, health and relationships of the older population in England: The 2004 English Longitudinal Study of Ageing (Wave 2). London: The Institute for Fiscal Studies; 2006.
- (25) Cheshire H, Hussey D, Medina J, Pickering K, Wood N, Ward K et al. Financial circumstances, health and well-being of the older population in England: The 2008 English Longitudinal Study of Ageing. Wave 4 Technical Report. London: National Centre for Social Research; 2012.
- (26) Sen A. Health: perception versus observation. *BMJ* 2002; 324(7342):860-861.
- (27) Min LC, Reuben DB, MacLean CH, Shekelle PG, Solomon DH, Higashi T et al. Predictors of Overall Quality of Care Provided to Vulnerable Older People. *J Am Geriatr Soc* 2005; 53(10):1705-1711.
- (28) McBride D, Hardoon S, Walters K, Gilmour S, Raine R. Explaining variation in referral from primary to secondary care: cohort study. *BMJ* 2010; 341.

- 1  
2  
3 (29) NHS Employers and the General Practitioners Committee. Quality and Outcomes  
4 Framework for 2012/13. Guidance for PCOs and practices. London: NHS Employers;  
5 2012.  
6  
7 (30) Gillam S, Steel N. The Quality and Outcomes Framework: where next? BMJ 2013;  
8 346.  
9  
10 (31) Gillam SJ, Siriwardena AN, Steel N. Pay-for-Performance in the United Kingdom:  
11 Impact of the Quality and Outcomes Framework - A Systematic Review. The Annals  
12 of Family Medicine 2012; 10(5):461-468.  
13  
14 (32) Steel N, Maisey S, Clark A, Fleetcroft R, Howe A. Quality of clinical primary care  
15 and targeted incentive payments: an observational study. Br J Gen Pract  
16 2007;(57):449-454.  
17  
18 (33) Steel N. Thresholds for taking antihypertensive drugs in different professional and lay  
19 groups: questionnaire survey. BMJ 2000; 320:1446-7.  
20  
21 (34) Montgomery AA, Fahey T. How do patients' treatment preferences compare with  
22 those of clinicians? Quality in health care 2001; 10 (Suppl I):i39-i43.  
23  
24 (35) Sanders C, Donovan JL, Dieppe PA. Unmet need for joint replacement: a qualitative  
25 investigation of barriers to treatment among individuals with severe pain and  
26 disability of the hip and knee. Rheumatology 2004; 43(3):353-357.  
27  
28 (36) Murray J, Banerjee S, Byng R, Tylee A, Bhugra D, Macdonald A. Primary care  
29 professionals' perceptions of depression in older people: a qualitative study. Social  
30 Science & Medicine 2006; 63:1363-73.  
31  
32 (37) Mercer SW, Guthrie B, Furler J, Watt G, Tudor Hart J. Multimorbidity and the  
33 inverse care law in primary care. BMJ 2012; 344.  
34  
35 (38) Wennberg JE. Understanding Geographic Variations in Health Care Delivery. The  
36 New England Journal of Medicine 1999; 340(1):52-53.  
37  
38 (39) Wennberg JE. Unwarranted variations in healthcare delivery: implications for  
39 academic medical centres. BMJ 2002; 325(7370):961-964.  
40  
41  
42  
43  
44  
45  
46  
47  
48  
49  
50  
51  
52  
53  
54  
55  
56  
57  
58  
59  
60



## Supplemental file 1

**Supplemental Table 1.** Odds ratios for meeting the ‘illness burden’ criteria for angina, cataract, depression, diabetes and osteoarthritis, medical diagnosis for those estimated to have a condition, and treatment for those with a diagnosis, comparing the least wealthy with the most wealthy: binomial regression

| Condition      | Adjusted odds ratios* (95% CI) |                                  |                       |                 |
|----------------|--------------------------------|----------------------------------|-----------------------|-----------------|
|                | Illness burden<br>(Wave 3)     | Medical<br>diagnosis<br>(Wave 4) | Treatment<br>(Wave 5) | N in treatment† |
| Angina         | <b>8.7</b> (5.5, 13.8)         | 1.4 (0.5, 4.0)                   | 1.6 (0.3, 9.0)        | 11              |
| Cataract       | <b>8.2</b> (5.1, 13.1)         | 1.0 (0.3, 3.1)                   | <b>2.2</b> (1.2, 3.8) | 83              |
| Osteoarthritis | <b>12.7</b> (9.1, 17.8)        | 0.7 (0.3, 1.6)                   | 0.7 (0.3, 1.6)        | 30              |
|                | Adjusted odds ratios* (95% CI) |                                  |                       |                 |
|                | Illness burden<br>(Wave 2)     | Medical<br>diagnosis<br>(Wave 3) | Treatment<br>(Wave 4) | N in treatment† |
| Depression     | <b>5.1</b> (4.3, 6.2)          | 0.4 (0.1, 1.4)                   | 17.3 (0.5, 604)       | 12              |
| Diabetes       | <b>4.4</b> (2.5, 8.0)          | 0.1 (0.0, 3.6)                   | 0.5 (0.2, 1.1)        | 99              |

\*adjusted for age group and sex

†followed through the waves

Waves used in analysis were the most recent with available data

Odds ratios where the 95% confidence intervals do not include 1 (before rounding to one decimal place) are shown in bold

STROBE 2007 (v4) Statement—Checklist of items that should be included in reports of *cross-sectional studies*

| Section/Topic             | Item # | Recommendation                                                                                                                                                                       | Reported on page # |
|---------------------------|--------|--------------------------------------------------------------------------------------------------------------------------------------------------------------------------------------|--------------------|
| Title and abstract        | 1      | (a) Indicate the study’s design with a commonly used term in the title or the abstract                                                                                               | 1&2                |
|                           |        | (b) Provide in the abstract an informative and balanced summary of what was done and what was found                                                                                  | 2                  |
| <b>Introduction</b>       |        |                                                                                                                                                                                      |                    |
| Background/rationale      | 2      | Explain the scientific background and rationale for the investigation being reported                                                                                                 | 4                  |
| Objectives                | 3      | State specific objectives, including any prespecified hypotheses                                                                                                                     | 4                  |
| <b>Methods</b>            |        |                                                                                                                                                                                      |                    |
| Study design              | 4      | Present key elements of study design early in the paper                                                                                                                              | 4-6                |
| Setting                   | 5      | Describe the setting, locations, and relevant dates, including periods of recruitment, exposure, follow-up, and data collection                                                      | 4-5                |
| Participants              | 6      | (a) Give the eligibility criteria, and the sources and methods of selection of participants                                                                                          | 4-6                |
| Variables                 | 7      | Clearly define all outcomes, exposures, predictors, potential confounders, and effect modifiers. Give diagnostic criteria, if applicable                                             | 5                  |
| Data sources/ measurement | 8*     | For each variable of interest, give sources of data and details of methods of assessment (measurement). Describe comparability of assessment methods if there is more than one group | 5                  |
| Bias                      | 9      | Describe any efforts to address potential sources of bias                                                                                                                            | 6                  |
| Study size                | 10     | Explain how the study size was arrived at                                                                                                                                            | 6                  |
| Quantitative variables    | 11     | Explain how quantitative variables were handled in the analyses. If applicable, describe which groupings were chosen and why                                                         | 6                  |
| Statistical methods       | 12     | (a) Describe all statistical methods, including those used to control for confounding                                                                                                | 6                  |
|                           |        | (b) Describe any methods used to examine subgroups and interactions                                                                                                                  | 6                  |
|                           |        | (c) Explain how missing data were addressed                                                                                                                                          | 6                  |
|                           |        | (d) If applicable, describe analytical methods taking account of sampling strategy                                                                                                   | 6                  |
|                           |        | (e) Describe any sensitivity analyses                                                                                                                                                | 6                  |
| <b>Results</b>            |        |                                                                                                                                                                                      |                    |

|                          |     |                                                                                                                                                                                                              |       |
|--------------------------|-----|--------------------------------------------------------------------------------------------------------------------------------------------------------------------------------------------------------------|-------|
| Participants             | 13* | (a) Report numbers of individuals at each stage of study—eg numbers potentially eligible, examined for eligibility, confirmed eligible, included in the study, completing follow-up, and analysed            | 6-8   |
|                          |     | (b) Give reasons for non-participation at each stage                                                                                                                                                         | 6-8   |
|                          |     | (c) Consider use of a flow diagram                                                                                                                                                                           |       |
| Descriptive data         | 14* | (a) Give characteristics of study participants (eg demographic, clinical, social) and information on exposures and potential confounders                                                                     | 7     |
|                          |     | (b) Indicate number of participants with missing data for each variable of interest                                                                                                                          |       |
| Outcome data             | 15* | Report numbers of outcome events or summary measures                                                                                                                                                         | 8     |
| Main results             | 16  | (a) Give unadjusted estimates and, if applicable, confounder-adjusted estimates and their precision (eg, 95% confidence interval). Make clear which confounders were adjusted for and why they were included | 7-9   |
|                          |     | (b) Report category boundaries when continuous variables were categorized                                                                                                                                    | 7     |
|                          |     | (c) If relevant, consider translating estimates of relative risk into absolute risk for a meaningful time period                                                                                             |       |
| Other analyses           | 17  | Report other analyses done—eg analyses of subgroups and interactions, and sensitivity analyses                                                                                                               | 7     |
| <b>Discussion</b>        |     |                                                                                                                                                                                                              |       |
| Key results              | 18  | Summarise key results with reference to study objectives                                                                                                                                                     | 10    |
| Limitations              | 19  | Discuss limitations of the study, taking into account sources of potential bias or imprecision. Discuss both direction and magnitude of any potential bias                                                   | 10-11 |
| Interpretation           | 20  | Give a cautious overall interpretation of results considering objectives, limitations, multiplicity of analyses, results from similar studies, and other relevant evidence                                   | 11    |
| Generalisability         | 21  | Discuss the generalisability (external validity) of the study results                                                                                                                                        | 11-12 |
| <b>Other information</b> |     |                                                                                                                                                                                                              |       |
| Funding                  | 22  | Give the source of funding and the role of the funders for the present study and, if applicable, for the original study on which the present article is based                                                | 12    |

\*Give information separately for cases and controls in case-control studies and, if applicable, for exposed and unexposed groups in cohort and cross-sectional studies.

**Note:** An Explanation and Elaboration article discusses each checklist item and gives methodological background and published examples of transparent reporting. The STROBE checklist is best used in conjunction with this article (freely available on the Web sites of PLoS Medicine at <http://www.plosmedicine.org/>, Annals of Internal Medicine at <http://www.annals.org/>, and Epidemiology at <http://www.epidem.com/>). Information on the STROBE Initiative is available at [www.strobe-statement.org](http://www.strobe-statement.org).

# BMJ Open

## Economic inequalities in burden of illness, diagnosis and treatment of five long-term conditions in England: panel study.

|                                 |                                                                                                                                                                                                                                                                                                                                                                                                                                                                                                                                             |
|---------------------------------|---------------------------------------------------------------------------------------------------------------------------------------------------------------------------------------------------------------------------------------------------------------------------------------------------------------------------------------------------------------------------------------------------------------------------------------------------------------------------------------------------------------------------------------------|
| Journal:                        | <i>BMJ Open</i>                                                                                                                                                                                                                                                                                                                                                                                                                                                                                                                             |
| Manuscript ID:                  | bmjopen-2014-005530.R1                                                                                                                                                                                                                                                                                                                                                                                                                                                                                                                      |
| Article Type:                   | Research                                                                                                                                                                                                                                                                                                                                                                                                                                                                                                                                    |
| Date Submitted by the Author:   | 28-Jul-2014                                                                                                                                                                                                                                                                                                                                                                                                                                                                                                                                 |
| Complete List of Authors:       | Steel, Nicholas; University of East Anglia<br>Hardcastle, Antonia; University of East Anglia, Norwich Medical School<br>Bachmann, Max; Univeristy of East Anglia, School of Medicine, Health Policy and Practic<br>Richards, Suzanne; University of Exeter Medical School,<br>Mounce, Luke; University of Exeter Medical School,<br>Clark, Allan; University of East Anglia, Norwich Medical School<br>Lang, Iain; PenCLAHRC,<br>Melzer, David; University of Exeter Medical School,<br>Campbell, John; University of Exeter, Primary Care; |
| <b>Primary Subject Heading</b>: | Health services research                                                                                                                                                                                                                                                                                                                                                                                                                                                                                                                    |
| Secondary Subject Heading:      | Health services research, Epidemiology, Public health, Sociology                                                                                                                                                                                                                                                                                                                                                                                                                                                                            |
| Keywords:                       | Quality in health care < HEALTH SERVICES ADMINISTRATION & MANAGEMENT, EPIDEMIOLOGY, Health policy < HEALTH SERVICES ADMINISTRATION & MANAGEMENT                                                                                                                                                                                                                                                                                                                                                                                             |
|                                 |                                                                                                                                                                                                                                                                                                                                                                                                                                                                                                                                             |

SCHOLARONE™  
Manuscripts

1  
2  
3  
4 **Economic inequalities in burden of illness, diagnosis and**  
5 **treatment of five long-term conditions in England: panel study.**  
6  
7  
8

9  
10 Steel N, Hardcastle A, Bachmann MO, Richards S, Mounce L, Clark A, Lang I, Melzer D,  
11 Campbell J.

12  
13 N Steel, Clinical Senior Lecturer<sup>1</sup>  
14 AC Hardcastle, Senior Research Associate<sup>1</sup>  
15 MO Bachmann, Professor of Health Services Research<sup>1</sup>  
16 S H Richards, Senior Lecturer<sup>2</sup>  
17 LTA Mounce, Research Associate<sup>2</sup>  
18 A Clark, Senior Lecturer<sup>1</sup>  
19 I Lang, Senior Lecturer in Public Health<sup>3</sup>  
20 D Melzer, Professor of Epidemiology and Public Health<sup>2</sup>  
21 J Campbell, Professor of General Practice and Primary Care<sup>2</sup>  
22

23  
24 <sup>1</sup>Population Health and Primary Care, Norwich Medical School, University of East Anglia,  
25 Norwich NR4 7TJ  
26

27  
28 <sup>2</sup>University of Exeter Medical School, Smeall Building, St Luke's Campus, Exeter, EX1 2LU  
29

30  
31 <sup>3</sup>NIHR CLAHRC South West Peninsula, Veysey Building, Salmon Pool Lane, Exeter, EX2  
32 4SG

33 Corresponding author: Nicholas Steel  
34 [n.steel@uea.ac.uk](mailto:n.steel@uea.ac.uk)  
35 01603 591161  
36  
37  
38  
39  
40  
41  
42  
43  
44  
45  
46  
47  
48  
49  
50  
51  
52  
53  
54  
55  
56  
57  
58  
59  
60

## Abstract

### Objective:

We compared the distribution by wealth of self-reported illness burden (estimated from validated scales, biomarker and reported symptoms) for angina, cataract, depression, diabetes and osteoarthritis, with the distribution of self-reported medical diagnosis and treatment. We aimed to determine if the greater illness burden borne by poorer participants was matched by appropriately higher levels of diagnosis and treatment.

### Design:

The English Longitudinal Study of Ageing, a panel study of 12,765 participants aged 50 years and older in four waves from 2004 to 2011, selected using a stratified random sample of households in England. Distribution of illness burden, diagnosis and treatment by wealth was estimated using regression analysis.

### Outcome measures:

The main outcome measures were odds ratios (ORs) for the illness burden, diagnosis and treatment respectively, adjusted for age, sex and wealth. We estimated the illness burden for angina with the Rose Angina scale, diabetes with fasting glycosylated haemoglobin, depression with the Centre for Epidemiologic Studies Depression Scale, osteoarthritis with self-reported pain and disability, and cataract with self-reported poor vision. Medical diagnoses were self-reported for all conditions. Treatment was defined as beta-blocker prescription for angina, surgery for osteoarthritis and cataract, and receipt of pre-defined effective interventions for diabetes and depression.

### Results:

Compared to the wealthiest, the least wealthy participant had substantially higher odds for illness burden from any of the five conditions at all four time points, with odds ratios ranging from 4.2 (95% confidence interval 2.6 to 6.8) for diabetes to 15.1 (11.4 to 20.0) for osteoarthritis. The odds ratios for diagnosis and treatment were smaller in all 5 conditions, and ranged from 0.9 (0.5 to 1.4) for diabetes treatment to 4.5 (3.3 to 6.0) for angina diagnosis.

### Conclusions:

The substantially higher illness burden in less wealthy participants was not matched by appropriately higher levels of diagnosis and treatment.

## Strengths and limitations of this study

- The English Longitudinal Study of Ageing (ELSA) is a unique single source of detailed longitudinal data on socioeconomic status and health, and this is the first study to compare inequalities in illness burden, self-reported medical diagnosis and treatment of long-term conditions in a longitudinal panel study
- Highly detailed measures of individual wealth were used alongside standardised scales and blood biomarker to assess the illness burden of depression, angina and diabetes
- Standardised scales were not included in ELSA for osteoarthritis and cataract, so assessment of illness burden for these two conditions was based on attributed symptoms which were not specific for osteoarthritis and cataract
- The study used self-reported data collected using an extensively tested structured questionnaire, but no information from medical records was collected
- An analysis of pooled data from 4 waves of ELSA was used to maximise the sample size, and the main finding that less wealthy participants are relatively underdiagnosed requires validation in a larger longitudinal study.

## Main text

### Introduction

Poverty is associated with poor health, poor access to health care and poor health outcomes in many countries and across different health care systems<sup>1-3</sup>. Much of this variation is caused by recognised broad social determinants of health<sup>4</sup>. Considerable political effort has been directed at attempts to narrow health inequalities by reducing poverty and social exclusion. However, as health care has become more effective at improving health, its potential contribution to ameliorating health inequalities has increased. McKeown demonstrated in the 1970s that health services had contributed little to health improvement<sup>5</sup>, but the same claim could not be made today. The past 30 years have seen the introduction of a wide range of effective interventions, particularly for the prevention and management of chronic disease<sup>6</sup>. Yet although these new interventions improve health, they are not necessarily applied equally across the population. Health inequalities will widen if effective services are offered, or taken up, with greater frequency by wealthier than less wealthy people. The reverse is also true, however, and there is an opportunity for healthcare to reduce social inequalities if it reaches those most in need<sup>7</sup>.

Little is known about pathways into poor health. The National Health Service provides medical care free at point-of-need to all UK residents, but there is scope for inequalities to occur in the pathway from identification of early symptoms through diagnosis and on to effective treatment. Individuals in more deprived social groups may be more reluctant to present to doctors with their symptoms and so may not receive a diagnosis<sup>8,9</sup>. Diagnosis is a key step that has meaning for both patient and physician in all health systems, and 'diagnostic confusion' may act as a barrier to health care for vulnerable populations<sup>10,8,11</sup>. Previous studies have found socio-economic variation in either diagnosis or treatment rates, but have not been able to compare inequalities in illness burden, rates of diagnosis and treatment modalities in the same population<sup>12-14</sup>.

The English Longitudinal Study of Ageing (ELSA) provides new data that can be used to identify barriers to equitable receipt of healthcare, and constitutes a unique source of information on illness burden, self-reported medical diagnosis and treatment. Other data sources cover symptoms, or diagnosis, or treatment, but no other single source covers all three. ELSA collects data on symptoms and validated markers of common health conditions, as well as diagnosis and treatment. It also contains detailed socio-demographic information, including direct measures of personal wealth, on a sample selected to be representative of the population of England aged 50 years and older. These data can be used to compare socio-economic inequalities for several conditions, providing insight into a healthcare system with no direct financial barriers to treatment (the National Health Service in England). We aimed to assess socio-economic inequalities in the burden of illness (estimated by validated scales, biomarker, and reported symptoms) of angina, cataract, depression, diabetes and osteoarthritis, and compare them with inequalities in self-reported medical diagnosis and treatment, in order to determine whether key components of health care were received equitably.



## Methods

We obtained data from the ELSA cohort, an interview survey of a sample of the population aged 50 years or older in England. The sample was selected from households that had previously responded to the Health Survey for England, and drawn from selected postcode sectors stratified by health authority and deprivation to be representative of adults aged 50 or more living in private households in England<sup>15</sup>. Participants are interviewed in their homes or care homes every two years about a wide range of health, economic and social topics. We used data collected from core participants who had been interviewed in any of four waves of ELSA from wave 2 in 2004-5 until wave 5 in 2010-11. Wave 2 was the first wave to include questions on receipt of quality-indicated healthcare, and information was not collected on every variable in every wave. Ethical approval was received from the London Multi-Centre Research Ethics Committee. We studied five common and important long-term conditions: angina, diabetes, depression, osteoarthritis, and cataract. Effective treatment is freely available for all five conditions from the National Health Service.

## Variables

We collected data on illness burden, self-reported medical diagnosis and treatment of angina, cataract, depression, diabetes and osteoarthritis. The illness burden for angina was defined as grade 2 on the Rose Angina scale (pain or discomfort in chest when walking at an ordinary pace on the level on most occasions or more often, which makes subject stop or slow down if occurs while walking, and which then goes away within 10 minutes, and which includes either sternum (any level), or left arm and left anterior chest). Illness burden for diabetes was defined as a fasting HbA1c level of >7.5%<sup>16</sup>. Illness burden for depression was defined as a score of 3 or more on the eight-item Centre for Epidemiologic Studies Depression Scale (CES-D). The application of these standardised scales in ELSA has been described previously<sup>1</sup>. Illness burden for osteoarthritis was defined as self-reported pain in the hip or knee of 5 or more on a scale of 0 to 10<sup>17</sup>. Illness burden for cataract was defined broadly as reporting poor vision or blindness. Cataract is responsible for about a quarter of poor vision in the UK, so this measure is the least specific and includes those with other causes of poor vision, such as age-related macular degeneration, which is responsible for about a third of poor vision<sup>18;19</sup>.

A medical diagnosis was considered to exist if a participant answered 'yes' when asked whether a doctor had ever told them they had the condition of interest. For arthritis, a follow-up question asked whether they had been told they had osteoarthritis, rheumatoid or other arthritis.

Treatment for depression and diabetes was defined by reported achievement of quality of care indicators, derived through a robust process of literature reviews, expert panel assessment and piloting<sup>20;21</sup>. For depression, the quality indicator was about receipt of treatment since the previous wave: '*if a person is diagnosed with clinical depression, then antidepressive treatment, talking treatment or electroconvulsive treatment should be offered within 2 weeks after diagnosis unless within that period the patient has improved, or unless the patient has substance abuse or dependence, in which case treatment may wait until 8 weeks after the patient is in a drug-or alcohol-free state*'. For diabetes, treatment was measurement of glycosylated haemoglobin or fructosamine levels in the preceding 12 months. Treatment for angina was defined as ever being offered or currently taking beta-blockers (ELSA variables

1  
2  
3 hebeta or hebetb). Treatment for osteoarthritis and cataract were defined as reporting ever  
4 having had surgery for the condition. For osteoarthritis this excluded those with hips or knees  
5 replaced due to fracture. Data on hip and knee replacements were only available for  
6 respondents aged 60 and over, and so respondents aged less than 60 years (n= 3,186) were  
7 excluded from the analysis of osteoarthritis.  
8

9  
10 Wealth was defined as the sum of financial, physical and housing wealth plus state and  
11 private pension income. Age was categorised into three groups, 50-59 years, 60-74 years and  
12 75 years and older.  
13

### 14 **Analysis**

15 We used two approaches to analysis, a main analysis using serial cross sectional data and  
16 then a subsidiary analysis using longitudinal data. Multivariable logistic regression analysis  
17 was used, with the outcome variables defined as one of illness burden, self-reported medical  
18 diagnosis or treatment for each of the five conditions in each cross-sectional wave (STATA  
19 statistical software version 12.1). This regression analysis was repeated for each of the four  
20 waves of ELSA from 2004 to 2011 separately and then 'overall' for all four waves combined.  
21 For the 'overall' analysis, the data were reshaped into 'long' format in Stata statistical  
22 software, with each participant having a separate record for each wave. Intra-person  
23 correlation of outcomes was accounted for using robust adjustment with Stata, with each  
24 participant's unique identifier included in the regression equation as a cluster variable.  
25 Missing data were excluded from the analyses.  
26  
27

28  
29 The independent variables were age group, sex and slope order of inequality. We used the  
30 slope order of inequality as an independent variable to estimate the relationship between the  
31 outcome measures and the categorised measure of wealth<sup>22,23</sup>. The slope order of inequality  
32 consisted of wealth quintiles with values of 0.1, 0.3, 0.5, 0.7 and 0.9, that is, the midpoints of  
33 each quintile on a scale of zero (least wealthy) to one (most wealthy). The slope order of  
34 inequality was modelled as a continuous variable, so that the slope or coefficient of a logit  
35 linear regression line across all five quintiles represents the difference in outcome between  
36 the hypothetically wealthiest and least wealthy participant. Exponentiating this slope  
37 coefficient results in an odds ratio, which is the ratio of the odds of the outcome in the  
38 wealthiest compared with the least wealthy participant. This odds ratio is also known as a  
39 relative index of inequality<sup>22</sup>. Advantages of this method of quantifying inequality are that it  
40 includes all participants, instead of just comparing the highest and lowest quintiles, it  
41 accounts for the number of participants in each category and it provides a single overall  
42 measure of inequality.  
43  
44

45 We included all participants in the main cross sectional analysis in order to compare the  
46 distribution of illness burden in the whole population with the distributions of diagnoses and  
47 treatments in the whole population. This meant that diagnosis was assessed even in those who  
48 did not meet the criteria for 'illness burden', and treatment was assessed even in those with  
49 no diagnosis. For the subsidiary analysis using longitudinal data, we estimated the odds ratio  
50 of receiving a diagnosis by a subsequent wave only for those who had met the criteria for  
51 'illness burden' in a previous wave, and then the likelihood of receiving treatment only for  
52 those who had received a diagnosis in a previous wave. This was a subsidiary analysis as the  
53 numbers of participants that could be followed over time in this manner was small,  
54 particularly for treatment in angina and depression.  
55  
56  
57  
58  
59  
60

## Results

The whole sample (n=12,765) was composed of participants aged 50 years or more who had responded to at least one wave of ELSA from 2004-5 until 2010-11. The response rate in 2004-5 was 82%.<sup>24;25</sup> In wave 5 (2010-11), over half of the sample of 8,729 were women, or were aged between 60 and 74 years (Table 1). Self-reported medical diagnosis for all five conditions increased as wealth decreased, for example in depression from 4% in the wealthiest quintile to 11% in the poorest (Table 1). There was little variation between the waves for each of the five conditions (Table 2).

The hypothetically least wealthy participant had substantially higher odds than the hypothetically most wealthy of meeting the criteria for 'illness burden' from any of the five conditions at all four time points (overall odds ratios (OR) ranged from 4.2 to 15.1) (Table 3). The least wealthy participant also had higher odds of diagnosis (ORs 1.1 to 4.5) and either no different or relatively small odds of treatment (ORs 0.9 to 2.6) (Table 3, Figure 1).

For angina, the overall odds ratio for meeting the criteria for 'illness burden' was 7.6, indicating that the hypothetically least wealthy individual was seven times more likely to have angina symptoms (defined by the Rose angina scale) than the wealthiest. The odds ratio for self-reported medical diagnosis was 4.5, suggesting that some less wealthy people with angina symptoms had not received a diagnosis of angina, as the expected odds ratio for equitably distributed diagnosis would have been 7.6. The odds ratio for treatment was 3.2, and again the expected odds ratios for equitably distributed treatment would have been 7.6. For depression, the overall odds ratio for illness burden was 6.4, for medical diagnosis was 3.3, and for treatment was 2.6, again suggesting that some poorer people with symptoms of depression were less likely to have received a diagnosis or indicated health care, as the expected odds ratios for equitably distributed treatment would have been 6.4.

For diabetes, the overall odds ratio for illness burden was 4.2 and 4.0 for diagnosis, suggesting that for diabetes diagnosis was distributed equitably. However, the odds ratio for treatment was 0.9 and not statistically significantly different from 1, again suggesting that some less wealthy people with medically diagnosed diabetes had not received treatment, as the expected odds ratios for equitably distributed treatment would have been 4.2.

The subsidiary analysis calculated the odds ratios of receiving a diagnosis by a subsequent wave only for those who had met the criteria for 'illness burden' for the relevant long term condition in a previous wave; and then the likelihood of receiving treatment only for those who had received a medical diagnosis in a previous wave. The substantial inequalities in the illness burden of conditions by wealth are identical to Table 3, as expected, and subsequently the numbers of eligible participants dwindle rapidly due to the nested nature of the analysis, with some wide confidence intervals and 9 out of 10 results not statistically significant (Supplemental file 1).

**Table 1:** Characteristics of ELSA participants at wave 5 (2010-11) and self-reported medical diagnosis of angina, cataract, depression, diabetes and osteoarthritis.

|                  |         | <b>Whole sample</b> | <b>Angina</b> | <b>Cataract</b> | <b>Depression</b> | <b>Diabetes</b> | <b>Osteoarthritis</b> |
|------------------|---------|---------------------|---------------|-----------------|-------------------|-----------------|-----------------------|
|                  |         | <b>N</b>            | <b>%</b>      | <b>%</b>        | <b>%</b>          | <b>%</b>        | <b>%</b>              |
| Sex              | Male    | 3,886               | 8.2           | 13.4            | 5.4               | 13.3            | 19.8                  |
|                  | Female  | 4,843               | 6.3           | 20.4            | 7.8               | 9.4             | 32.9                  |
| Age (years)      | 50-59   | 1,906               | 2.2           | 3.7             | 10.1              | 7.2             | 17.1                  |
|                  | 60-74   | 4,766               | 5.8           | 14.5            | 7.0               | 11.0            | 28.1                  |
|                  | 75+     | 2,057               | 15.0          | 36.6            | 2.9               | 15.0            | 34.1                  |
| Wealth quintile* | 1       | 1,716               | 3.4           | 13.8            | 4.1               | 6.0             | 21.5                  |
|                  | 2       | 1,714               | 4.9           | 15.5            | 5.9               | 8.0             | 24.2                  |
|                  | 3       | 1,723               | 6.6           | 20.1            | 5.7               | 11.3            | 25.7                  |
|                  | 4       | 1,716               | 8.2           | 18.6            | 6.7               | 13.6            | 31.6                  |
|                  | 5       | 1,715               | 12.9          | 19.2            | 11.5              | 16.7            | 33.1                  |
|                  | missing | 145                 | 5.5           | 9.7             | 4.8               | 9.7             | 20.0                  |
| Total            |         | 8,729               | 7.2           | 17.3            | 6.7               | 11.1            | 27.1                  |

\*1=wealthiest quintile, 5=least wealthy quintile

**Table 2.** Prevalence of illness burden, self-reported medical diagnosis, and treatment for angina, cataract, depression, diabetes and osteoarthritis in four waves of ELSA

|                                                                                                       | <b>Angina</b> | <b>Cataract</b> | <b>Depression</b> | <b>Diabetes</b> | <b>Osteoarthritis</b> |
|-------------------------------------------------------------------------------------------------------|---------------|-----------------|-------------------|-----------------|-----------------------|
|                                                                                                       | <b>N (%)</b>  | <b>N (%)</b>    | <b>N (%)</b>      | <b>N (%)</b>    | <b>N (%)</b>          |
| <b>Illness burden</b>                                                                                 |               |                 |                   |                 |                       |
| Wave 2 (2004-5)                                                                                       | 397 (4.6)     | 308 (3.5)       | 2,037 (23.4)      | 160 (1.8)       | 1,106 (12.7)          |
| Wave 3 (2006-7)                                                                                       | 300 (3.6)     | 317 (3.8)       | 1,929 (23.3)      | n/a             | 917 (11.1)            |
| Wave 4 (2008-9)                                                                                       | 300 (3.1)     | 331 (3.5)       | 2,049 (21.4)      | 220 (2.3)       | 1,088 (11.4)          |
| Wave 5 (2010-11)                                                                                      | 254 (2.9)     | 320 (3.7)       | 1,956 (22.4)      | n/a             | 1,046 (12.0)          |
| <b>Medical diagnosis</b>                                                                              |               |                 |                   |                 |                       |
| Wave 2 (2004-5)                                                                                       | 668 (7.6)     | 1,050 (12.1)    | 402 (4.6)         | 715 (8.2)       | 1,861 (21.4)          |
| Wave 3 (2006-7)                                                                                       | 591 (7.1)     | 1,294 (15.7)    | 490 (5.9)         | 935 (11.3)      | 1,952 (23.6)          |
| Wave 4 (2008-9)                                                                                       | 645 (6.7)     | 1,421 (14.8)    | 601 (6.3)         | 1,215 (12.7)    | 2,262 (23.6)          |
| Wave 5 (2010-11)                                                                                      | 655 (7.5)     | 1,566 (17.9)    | 602 (6.9)         | 1,413 (16.2)    | 2,416 (27.7)          |
| <b>Treatment</b>                                                                                      |               |                 |                   |                 |                       |
| Wave 2 (2004-5)                                                                                       | 85 (1.0)      | 535 (6.2)       | 98 (1.1)          | 552 (6.4)       | 202 (2.3)             |
| Wave 3 (2006-7)                                                                                       | n/a           | 379 (4.9)       | n/a               | 618 (7.5)       | 141 (1.7)             |
| Wave 4 (2008-9)                                                                                       | n/a           | 444 (4.6)       | 155 (1.6)         | 671 (7.0)       | 226 (2.4)             |
| Wave 5 (2010-11)                                                                                      | 88 (1.0)      | 646 (7.4)       | n/a               | 748 (8.6)       | 208 (2.4)             |
| Total number of participants in each wave: wave 2: 8,688; wave 3: 8,268; wave 4: 9,578; wave 5: 8,729 |               |                 |                   |                 |                       |
| n/a = data not available for that condition in that wave                                              |               |                 |                   |                 |                       |

**Table 3.** Illness burden, self-reported medical diagnosis and treatment of angina, cataract, depression, diabetes and osteoarthritis, comparing the least wealthy with the most wealthy: logistic regression.

|                                       |                   | Angina                    | Cataract                  | Depression               | Diabetes                 | Osteoarthritis              |
|---------------------------------------|-------------------|---------------------------|---------------------------|--------------------------|--------------------------|-----------------------------|
| Odds ratios (95% confidence interval) |                   |                           |                           |                          |                          |                             |
| Wave 2*<br>(2004-5)                   | Illness burden    | <b>5.6</b><br>(3.8, 8.3)  | <b>7.2</b><br>(4.5, 11.5) | <b>5.1</b><br>(4.3, 6.2) | <b>4.4</b><br>(2.5, 8.0) | <b>11.0</b><br>(8.1, 14.9)  |
|                                       | Medical diagnosis | <b>2.9</b><br>(2.2, 3.9)  | <b>1.3</b><br>(1.0, 1.6)  | <b>4.8</b><br>(3.3, 7.0) | <b>3.1</b><br>(2.3, 4.2) | <b>1.6</b><br>(1.3, 2.0)    |
|                                       | Treatment         | <b>2.6</b><br>(1.2, 5.7)  | <b>1.5</b><br>(1.0, 2.2)  | 0.6<br>(0.1, 2.9)        | 0.7<br>(0.3, 1.5)        | 1.1<br>(0.7, 1.9)           |
| Wave 3*<br>(2006-7)                   | Illness burden    | <b>8.7</b><br>(5.5, 13.8) | <b>8.2</b><br>(5.1, 13.1) | <b>6.9</b><br>(5.7, 8.5) |                          | <b>12.7</b><br>(9.1, 17.8)  |
|                                       | Medical diagnosis | <b>4.9</b><br>(3.6, 6.8)  | <b>1.2</b><br>(1.0, 1.5)  | 0.7<br>(0.4, 1.4)        | <b>3.4</b><br>(2.6, 4.4) | <b>0.6</b><br>(0.4, 0.8)    |
|                                       | Treatment         |                           | 1.3<br>(0.8, 1.9)         |                          | 1.2<br>(0.6, 2.4)        | 1.0<br>(0.6, 1.9)           |
| Wave 4*<br>(2008-9)                   | Illness burden    | <b>6.7</b><br>(4.2, 10.5) | <b>5.5</b><br>(3.6, 8.6)  | <b>5.9</b><br>(4.9, 7.1) | <b>3.9</b><br>(2.4, 6.4) | <b>14.0</b><br>(10.3, 19.1) |
|                                       | Medical diagnosis | <b>4.3</b><br>(3.2, 5.9)  | 1.1<br>(0.9, 1.4)         | 0.7<br>(0.4, 1.2)        | <b>3.9</b><br>(3.1, 5.1) | <b>0.6</b><br>(0.4, 0.8)    |
|                                       | Treatment         |                           | 1.1<br>(0.7, 1.6)         | <b>2.4</b><br>(1.0, 5.9) | <b>0.2</b><br>(0.1, 0.6) | 1.0<br>(0.6, 1.6)           |
| Wave 5*<br>(2010-11)                  | Illness burden    | <b>8.4</b><br>(5.1, 13.7) | <b>6.2</b><br>(3.9, 9.9)  | <b>5.9</b><br>(4.8, 7.1) |                          | <b>16.0</b><br>(11.7, 21.8) |
|                                       | Medical diagnosis | <b>5.3</b><br>(3.9, 7.3)  | <b>1.3</b><br>(1.0, 1.5)  | <b>1.7</b><br>(1.0, 2.8) | <b>4.3</b><br>(3.4, 5.4) | <b>0.6</b><br>(0.4, 0.8)    |
|                                       | Treatment         | <b>3.3</b><br>(1.5, 7.3)  | <b>1.8</b><br>(1.2, 2.6)  |                          | 0.8<br>(0.4, 1.6)        | 1.2<br>(0.7, 2.0)           |
| Overall†                              | Illness burden    | <b>7.6</b><br>(5.4, 10.8) | <b>8.0</b><br>(5.4, 11.9) | <b>6.4</b><br>(5.5, 7.5) | <b>4.2</b><br>(2.6, 6.8) | <b>15.1</b><br>(11.4, 20.0) |
|                                       | Medical diagnosis | <b>4.5</b><br>(3.3, 6.0)  | <b>1.3</b><br>(1.1, 1.5)  | <b>3.3</b><br>(2.4, 4.5) | <b>4.0</b><br>(3.1, 5.2) | 1.1<br>(0.9, 1.3)           |
|                                       | Treatment         | <b>3.2</b><br>(1.7, 6.0)  | <b>1.3</b><br>(1.0, 1.8)  | <b>2.6</b><br>(1.1, 6.1) | 0.9<br>(0.5, 1.4)        | 1.2<br>(0.8, 1.6)           |

\*Odds ratios adjusted for age group and sex

†Odds ratios adjusted for age group, sex and unique participant identifier

\*\*Analyses for osteoarthritis excluded those younger than 60 years, as data on osteoarthritis treatment were only collected in those aged 60 or over.

Odds ratios where the 95% confidence intervals do not include 1 (before rounding to one decimal place) are shown in bold

## Discussion

We found that while there were strong inverse associations between wealth and the burden of illness (based on validated scales, symptoms and biomarker) of a long-term condition, there were smaller or absent inequalities in receipt of self-reported medical diagnosis or treatment for the conditions considered. This suggests that the substantially higher illness burden in less wealthy participants was not matched by appropriately higher levels of diagnosis and treatment, and that equitable receipt of a medical diagnosis may have an important role in reducing inequalities in health.

ELSA is a unique single source of detailed longitudinal data on socioeconomic status and health, and this is the first study to compare inequalities in illness burden, self-reported medical diagnosis and treatment of long-term conditions in a longitudinal panel study. ELSA used robust measures of individual socio-economic position, and standardised scales and blood biomarker to assess health status. This exploratory study has some limitations and the results should be interpreted with caution and tested in subsequent research. Whilst standardised measures were used to estimate the illness burden of depression, angina and diabetes, symptoms alone were used for osteoarthritis and cataract, and the attributed symptoms were not specific for osteoarthritis and cataract. However, this lack of specificity is unlikely to vary with wealth, and so is not likely to be an important source of bias. Self-reported data may be a source of bias if self-report varies by factors other than objective health status, such as wealth or social experience. This is a recognised problem with some self-reported morbidity data, but is less of a problem with sensory assessment for pain, which is essentially self-perceived, and where self-report is the best means of assessment <sup>26</sup>.

We have not adjusted for health-related factors that are also more prevalent in poorer populations, such as smoking, obesity and comorbidity, because none of these are a reason for not making a diagnosis. Comorbid conditions are commoner in those with lower socio-economic status, but there is no evidence that comorbidities make a new diagnosis less likely. On the contrary, a higher number of comorbid conditions in older people may be associated with higher quality of care <sup>27</sup>. We found different patterns in different conditions, which fits with other research showing that wealth acts differently in different conditions, and for example, has no association with referral for post-menopausal bleeding <sup>28</sup>. Major national policy interventions such as the Quality and Outcomes Framework payment for performance scheme in primary care <sup>29</sup> have been associated with improved healthcare for included conditions such as angina and diabetes, more than for excluded conditions such as osteoarthritis and poor vision <sup>30-32</sup>.

The serial cross-sectional analysis of 4 waves of ELSA included all eligible participants in each wave in order to maximise the sample size. This approach meant that some participants with a diagnosed condition would no longer have had symptoms or raised biomarkers, if they were being successfully treated. Examples would be diabetic participants whose blood sugar levels were being successfully controlled by treatment, and participants with successfully treated depression. We therefore checked our main results with the secondary (longitudinal) analysis, which assessed subsequent diagnosis in those had met the criteria for 'illness burden', and subsequent treatment in those with a medical diagnosis, but the number of participants who could be followed through the waves in this way was too small to allow meaningful conclusions to be drawn from the results.

1  
2  
3 Our results fit with previous findings that a greater proportion of people in deprived groups  
4 had Rose angina, but there was no difference in the proportions receiving a general  
5 practitioner diagnosis of coronary heart disease<sup>14</sup>. Care-seeking behaviour and patient  
6 preferences may differ with wealth. Given the same information, patients may want fewer  
7 medical interventions than their doctors recommend<sup>33;34</sup>, and pessimism about availability of  
8 treatment may make older people reluctant to seek help<sup>35</sup>. Older people may view living with  
9 symptoms (such as pain, or emotional problems) as a normal part of ageing<sup>36</sup>. The response  
10 of the primary care physician may also vary with the wealth of the patient. For example, the  
11 physician might be more likely to consider symptoms of breathlessness as a medical problem  
12 requiring a diagnosis, whereas aches and pains, poor vision, and low mood might be  
13 considered part of the tapestry of life, or the natural ageing process. Comorbidity is more  
14 common in deprived populations, and may make diagnosis of all conditions harder for  
15 doctors within the constraints of a short consultation<sup>37</sup>.

16  
17  
18 At a system level, the results may be partially explained by wealthier people living in areas  
19 where there are more healthcare resources. Wennberg introduced the concept of 'supply-  
20 sensitive care' to describe how the quantity of healthcare resources allocated to a particular  
21 population was a major determinant of the frequency of use of health services by that  
22 population, and gives an example in which 'a doubling of the supply of internists or  
23 cardiologists results in roughly a halving of the interval between repeat visits'<sup>38;39</sup>. Where  
24 healthcare resources are relatively plentiful, patients with chronic diseases will consult more,  
25 use more diagnostic tests, and be referred to hospital more. Further research could helpfully  
26 investigate whether those missing out on diagnosis are not accessing health services, or are  
27 seeing a doctor but not being diagnosed. The participants were selected to be nationally  
28 representative of the population of England, and so the findings are likely to be generalisable  
29 to England, but not to countries with different healthcare systems. If validated, our findings  
30 that inequalities in receipt of diagnoses are potential barriers to equitable healthcare for five  
31 common long-term conditions, suggest that future policy interventions to reduce socio-  
32 economic inequalities in healthcare should consider improving access to diagnosis as well as  
33 treatment.  
34  
35  
36  
37  
38  
39  
40  
41  
42  
43  
44  
45  
46  
47  
48  
49  
50  
51  
52  
53  
54

55 **Funding statement:** This article presents independent research commissioned by the UK  
56 National Institute for Health Research (NIHR) under the Health Services Research  
57 programme: HSR Project 10/2002/06 – 'The dynamics of quality: a national panel study of  
58  
59  
60

1  
2  
3 evidence-based standards'. IL's work was supported by the NIHR Collaboration for Applied  
4 Health Research and Care (CLAHRC) for the South West Peninsula. The views expressed in  
5 this publication are those of the authors and not necessarily those of the NHS, the NIHR or  
6 the Department of Health.  
7

8  
9 **Competing interests:** All authors have completed the ICMJE uniform disclosure form at  
10 [www.icmje.org/coi\\_disclosure.pdf](http://www.icmje.org/coi_disclosure.pdf) and declare: all authors had financial support from the  
11 National Institute for Health Research for the submitted work, DM had financial support from  
12 Age UK; no financial relationships with any organisations that might have an interest in the  
13 submitted work in the previous three years; no other relationships or activities that could  
14 appear to have influenced the submitted work.  
15

16  
17 **Ethics approval:** The English Longitudinal Study of Ageing received ethics approval from  
18 the National Research Ethics Service: 09/H0505/124. Participants gave informed consent  
19 before taking part.  
20

21  
22 **Contributors:** NS contributed to the study design, oversaw data analysis and interpretation,  
23 and drafted the paper. NS is guarantor. AH undertook data preparation, analysis and  
24 interpretation, and contributed to drafting the paper. LM undertook data preparation and  
25 analysis. MB and AC advised on statistical techniques. SR, JC and IL advised on data  
26 analysis and interpretation. DM contributed to the study design and advised on data analysis  
27 and interpretation. All authors contributed to data interpretation and revised the paper  
28 critically. Dave Stott and Amander Wellings, representatives of Public and Patient  
29 Involvement in Research (PPIRes), brought a helpful lay perspective to this research.  
30

31  
32 **Data sharing:** The ELSA dataset and technical documentation are available from the UK  
33 Data Service at: <http://discover.ukdataservice.ac.uk/catalogue?sn=5050>.  
34  
35  
36  
37  
38  
39  
40  
41  
42  
43  
44  
45  
46  
47  
48  
49  
50  
51  
52  
53  
54  
55  
56  
57  
58  
59  
60



### Reference List

- (1) Marmot M, Banks J, Blundell R, et al. Health, Wealth and Lifestyles of the Older Population in England: the 2002 English Longitudinal Study of Ageing. London: The Institute for Fiscal Studies; 2003.
- (2) Börsch-Supan A, Brugiavini A, Jürges H, et al. Health, Ageing and Retirement in Europe. First Results from the Survey of Health, Ageing and Retirement in Europe. Mannheim: Mannheim Research Institute for the Economics of Aging (MEA); 2005.
- (3) Hemingway H, Shipley M, Macfarlane P, et al. Impact of socioeconomic status on coronary mortality in people with symptoms, electrocardiographic abnormalities, both or neither: the original Whitehall study 25 year follow up. *J Epidemiol Community Health* 2000; 54(7):510-516.
- (4) Wilkinson R, Marmot M. Social determinants of health: the solid facts. 2nd edition ed. Copenhagen: World Health Organisation; 2003.
- (5) McKeown T. The role of medicine: dream, mirage or nemesis? 1 ed. London: Nuffield Principal Hospital Trust; 1976.
- (6) Bunker JP. The role of medical care in contributing to health improvements within societies. *Int J Epidemiol* 2001; 30(6):1260-1263.
- (7) Watt G. The inverse care law today. *Lancet* 2002; 360:252-4.
- (8) Richards HM, Reid ME, Watt GCM. Socioeconomic variations in responses to chest pain: qualitative study. *BMJ* 2002; 324(7349):1308.
- (9) Gardner K, Chapple A. Barriers to referral in patients with angina: qualitative study. *BMJ* 1999; 319(7207):418-421.
- (10) Berger J, Mohr J. A fortunate man: the story of a country doctor. London: Penguin; 1967.
- (11) Tod AM, Read C, Lacey A, et al. Barriers to uptake of services for coronary heart disease: qualitative. *BMJ* 2001; 323(7306):214.
- (12) Chaturvedi N, Ben Shlomo Y. From the surgery to the surgeon: does deprivation influence consultation and operation rates? *Br J Gen Pract* 1995; 45(392):127-131.
- (13) Mahomed NN, Barrett JA, Katz JN, et al. Rates and outcomes of primary and revision total hip replacement in the United States medicare population. *J Bone Joint Surg Am* 2003; 85-A(1):27-32.
- (14) Richards H, McConnachie A, Morrison C, et al. Social and gender variation in the prevalence, presentation and general practitioner provisional diagnosis of chest pain. *J Epidemiol Community Health* 2000; 54(9):714-718.
- (15) Natcen Social Research. English Longitudinal Study of Ageing (ELSA) Wave One to Wave Five User Guide. <http://www.esds.ac>

1  
2  
3 uk/doc/5050/mrdoc/pdf/5050\_User\_Guide\_to\_the\_ELSA\_Datasets\_Waves\_1\_to\_5  
4 pdf [ 2012 [cited 2013 Sept. 28];  
5

- 6 (16) Scholes S, Taylor R, Cheshire H, et al. Retirement, health and relationships of the  
7 older population in England: The 2004 English Longitudinal Study of Ageing.  
8 Technical Report P2808. London: National Centre for Social Research; 2008.  
9
- 10 (17) Steel N, Melzer D, Gardener E, et al. Need for and receipt of hip and knee  
11 replacement--a national population survey. *Rheumatology* 2006;(45):1437-1441.  
12
- 13 (18) Evans JR, Fletcher AE, Wormald RPL, et al. Prevalence of partial sight and blindness  
14 in people aged 75 years and older in Britain: results from the MRC trial of assessment  
15 and management of older people in the community. *Br J Ophthalmol* 2002; 86:795-  
16 800.  
17
- 18 (19) Congdon N, O'Colmain B, Klaver CCW, et al. Causes and Prevalence of Partial sight  
19 and blindness among adults in the United States. *Arch Ophthalmol* 2004; 122:477-  
20 485.  
21
- 22 (20) Steel N, Melzer D, Shekelle PG, et al. Developing quality indicators for older adults:  
23 transfer from the USA to the UK is feasible. *Quality and Safety in Health Care* 2004;  
24 13(4):260-264.  
25
- 26 (21) Steel N, Bachmann M, Maisey S, et al. Self reported receipt of care consistent with 32  
27 quality indicators: National population survey of adults aged 50 or more in England.  
28 *BMJ* 2008; 337:a957.  
29
- 30 (22) Wagstaff A, Paci P, Van Doorslaer E. On the measurement of inequalities in health.  
31 *Soc Sci Med* 1991; 33(5):545-557.  
32
- 33 (23) Bachmann MO, Eachus J, Hopper CD, et al. Socio-economic inequalities in diabetes  
34 complications, control, attitudes and health service use: a cross-sectional study.  
35 *Diabet Med* 2003; 20(11):921-929.  
36
- 37 (24) Banks J, Breeze E, Lessof C, et al. Retirement, health and relationships of the older  
38 population in England: The 2004 English Longitudinal Study of Ageing (Wave 2).  
39 London: The Institute for Fiscal Studies; 2006.  
40
- 41 (25) Cheshire H, Hussey D, Medina J, et al. Financial circumstances, health and well-  
42 being of the older population in England: The 2008 English Longitudinal Study of  
43 Ageing. Wave 4 Technical Report. London: National Centre for Social Research;  
44 2012.  
45
- 46 (26) Sen A. Health: perception versus observation. *BMJ* 2002; 324(7342):860-861.  
47
- 48 (27) Min LC, Reuben DB, MacLean CH, et al. Predictors of Overall Quality of Care  
49 Provided to Vulnerable Older People. *J Am Geriatr Soc* 2005; 53(10):1705-1711.  
50
- 51 (28) McBride D, Hardoon S, Walters K, et al. Explaining variation in referral from  
52 primary to secondary care: cohort study. *BMJ* 2010; 341.  
53  
54  
55  
56  
57  
58  
59  
60

- 1  
2  
3 (29) NHS Employers and the General Practitioners Committee. Quality and Outcomes  
4 Framework for 2012/13. Guidance for PCOs and practices. London: NHS Employers;  
5 2012.  
6  
7 (30) Gillam S, Steel N. The Quality and Outcomes Framework: where next? BMJ 2013;  
8 346.  
9  
10 (31) Gillam SJ, Siriwardena AN, Steel N. Pay-for-Performance in the United Kingdom:  
11 Impact of the Quality and Outcomes Framework - A Systematic Review. The Annals  
12 of Family Medicine 2012; 10(5):461-468.  
13  
14 (32) Steel N, Maisey S, Clark A, et al. Quality of clinical primary care and targeted  
15 incentive payments: an observational study. Br J Gen Pract 2007;(57):449-454.  
16  
17 (33) Steel N. Thresholds for taking antihypertensive drugs in different professional and lay  
18 groups: questionnaire survey. BMJ 2000; 320:1446-7.  
19  
20 (34) Montgomery AA, Fahey T. How do patients' treatment preferences compare with  
21 those of clinicians? Quality in health care 2001; 10 (Suppl I):i39-i43.  
22  
23 (35) Sanders C, Donovan JL, Dieppe PA. Unmet need for joint replacement: a qualitative  
24 investigation of barriers to treatment among individuals with severe pain and  
25 disability of the hip and knee. Rheumatology 2004; 43(3):353-357.  
26  
27 (36) Murray J, Banerjee S, Byng R, et al. Primary care professionals' perceptions of  
28 depression in older people: a qualitative study. Social Science & Medicine 2006;  
29 63:1363-73.  
30  
31 (37) Mercer SW, Guthrie B, Furler J, et al. Multimorbidity and the inverse care law in  
32 primary care. BMJ 2012; 344.  
33  
34 (38) Wennberg JE. Understanding Geographic Variations in Health Care Delivery. The  
35 New England Journal of Medicine 1999; 340(1):52-53.  
36  
37 (39) Wennberg JE. Unwarranted variations in healthcare delivery: implications for  
38 academic medical centres. BMJ 2002; 325(7370):961-964.  
39  
40  
41  
42

43 **Figure 1.** Illness burden (in blue), self-reported medical diagnosis (in green), and treatment  
44 (in red) of angina, cataract, depression, diabetes and osteoarthritis, comparing the least  
45 wealthy with the most wealthy: Overall odds ratios (adjusted for age and sex) and 95%  
46 confidence bars (binomial regression)  
47  
48  
49  
50  
51  
52  
53  
54  
55  
56  
57  
58  
59  
60

1  
2  
3  
4  
5  
6  
7  
8 **Economic inequalities in burden of illness, diagnosis and**  
9 **treatment of five long-term conditions in England: panel study.**  
10

11  
12 Steel N, Hardcastle A, Bachmann MO, Richards S, Mounce L, Clark A, Lang I, Melzer D,  
13 Campbell J.  
14

15 N Steel, Clinical Senior Lecturer<sup>1</sup>  
16 AC Hardcastle, Senior Research Associate<sup>1</sup>  
17 MO Bachmann, Professor of Health Services Research<sup>1</sup>  
18 S H Richards, Senior Lecturer<sup>2</sup>  
19 LTA Mounce, Research Associate<sup>2</sup>  
20 A Clark, Senior Lecturer<sup>1</sup>  
21 I Lang, Senior Lecturer in Public Health<sup>3</sup>  
22 D Melzer, Professor of Epidemiology and Public Health<sup>2</sup>  
23 J Campbell, Professor of General Practice and Primary Care<sup>2</sup>  
24

25 <sup>1</sup>Population Health and Primary Care, Norwich Medical School, University of East Anglia,  
26 Norwich NR4 7TJ  
27

28 <sup>2</sup>University of Exeter Medical School, Smeall Building, St Luke's Campus, Exeter, EX1 2LU  
29

30 <sup>3</sup>NIHR CLAHRC South West Peninsula, Veysey Building, Salmon Pool Lane, Exeter, EX2  
31 4SG  
32

33 Corresponding author: Nicholas Steel  
34 [n.steel@uea.ac.uk](mailto:n.steel@uea.ac.uk)  
35 01603 591161  
36  
37  
38  
39  
40  
41  
42  
43  
44  
45  
46  
47  
48  
49  
50  
51  
52  
53  
54  
55

## Abstract

### Objective:

We compared the distribution by wealth of self-reported illness burden (estimated from validated scales, biomarker and reported symptoms) for angina, cataract, depression, diabetes and osteoarthritis, with the distribution of self-reported medical diagnosis and treatment. We aimed to determine if the greater illness burden borne by poorer participants was matched by appropriately higher levels of diagnosis and treatment.

### Design:

The English Longitudinal Study of Ageing, a panel study of 12,765 participants aged 50 years and older in four waves from 2004 to 2011, selected using a stratified random sample of households in England. Distribution of illness burden, diagnosis and treatment by wealth was estimated using regression analysis.

### Outcome measures:

The main outcome measures were odds ratios (ORs) for the illness burden, diagnosis and treatment respectively, adjusted for age, sex and wealth. We estimated the illness burden for angina with the Rose Angina scale, diabetes with fasting glycosylated haemoglobin, depression with the Centre for Epidemiologic Studies Depression Scale, osteoarthritis with self-reported pain and disability, and cataract with self-reported poor vision. Medical diagnoses were self-reported for all conditions. Treatment was defined as beta-blocker prescription for angina, surgery for osteoarthritis and cataract, and receipt of pre-defined effective interventions for diabetes and depression.

### Results:

Compared to the wealthiest, the least wealthy participant had substantially higher odds for illness burden from any of the five conditions at all four time points, with odds ratios ranging from 4.2 (95% confidence interval 2.6 to 6.8) for diabetes to 15.1 (11.4 to 20.0) for osteoarthritis. The odds ratios for diagnosis and treatment were smaller in all 5 conditions, and ranged from 0.9 (0.5 to 1.4) for diabetes treatment to 4.5 (3.3 to 6.0) for angina diagnosis.

### Conclusions:

The substantially higher illness burden in less wealthy participants was not matched by appropriately higher levels of diagnosis and treatment.

## Strengths and limitations of this study

- The English Longitudinal Study of Ageing (ELSA) is a unique single source of detailed longitudinal data on socioeconomic status and health, and this is the first study to compare inequalities in illness burden, self-reported medical diagnosis and treatment of long-term conditions on the same population over time in a longitudinal panel study
- Highly detailed measures of individual wealth were used alongside standardised scales and blood biomarker to assess the illness burden of depression, angina and diabetes
- Standardised scales were not included in ELSA for osteoarthritis and cataract, so assessment of illness burden for these two conditions was based on attributed symptoms which were not specific for osteoarthritis and cataract
- The study used self-reported data collected using an extensively tested structured questionnaire, but no information from medical records was collected
- An analysis of pooled data from 4 waves of ELSA was used to maximise the sample size, and the main finding that less wealthy participants are relatively underdiagnosed requires validation in a larger longitudinal study.

## Main text

### Introduction

Poverty is associated with poor health, poor access to health care and poor health outcomes in many countries and across different health care systems<sup>1-3</sup>. Much of this variation is caused by recognised broad social determinants of health<sup>4</sup>. Considerable political effort has been directed at attempts to narrow health inequalities by reducing poverty and social exclusion. However, as health care has become more effective at improving health, its potential contribution to ameliorating health inequalities has increased. McKeown demonstrated in the 1970s that health services had contributed little to health improvement<sup>5</sup>, but the same claim could not be made today. The past 30 years have seen the introduction of a wide range of effective interventions, particularly for the prevention and management of chronic disease<sup>6</sup>. Yet although these new interventions improve health, they are not necessarily applied equally across the population. Health inequalities will widen if effective services are offered, or taken up, with greater frequency by wealthier than less wealthy people. The reverse is also true, however, and there is an opportunity for healthcare to reduce social inequalities if it reaches those most in need<sup>7</sup>.

Little is known about pathways into poor health. The National Health Service provides medical care free at point-of-need to all UK residents, but there is scope for inequalities to occur in the pathway from identification of early symptoms through diagnosis and on to effective treatment. Individuals in more deprived social groups may be more reluctant to present to doctors with their symptoms and so may not receive a diagnosis<sup>8,9</sup>. Diagnosis is a key step that has meaning for both patient and physician in all health systems, and 'diagnostic confusion' may act as a barrier to health care for vulnerable populations<sup>10,8,11</sup>. Previous studies have found socio-economic variation in either diagnosis or treatment rates, but have not been able to compare inequalities in illness burden, rates of diagnosis and treatment modalities in the same population<sup>12-14</sup>.

The English Longitudinal Study of Ageing (ELSA) provides new data that can be used to identify barriers to equitable receipt of healthcare, and constitutes a unique source of information on illness burden, self-reported medical diagnosis and treatment. Other data sources cover symptoms, or diagnosis, or treatment, but no other single source covers all three. ELSA collects data on symptoms and validated markers of common health conditions, as well as diagnosis and treatment. It also contains detailed socio-demographic information, including direct measures of personal wealth, on a sample selected to be representative of the population of England aged 50 years and older. These data can be used to compare socio-economic inequalities for several conditions, providing insight into a healthcare system with no direct financial barriers to treatment (the National Health Service in England). We aimed to assess socio-economic inequalities in the burden of illness (estimated by validated scales, biomarker, and reported symptoms) of angina, cataract, depression, diabetes and osteoarthritis, and compare them with inequalities in self-reported reported medical diagnosis and treatment, in order to determine whether key components of health care were received equitably.

### Methods

We obtained data from the ELSA cohort, an interview survey of a sample of the population aged 50 years or older in England The sample was selected from households that had

1  
2  
3  
4  
5  
6  
7 previously responded to the Health Survey for England, and drawn from selected postcode  
8 sectors stratified by health authority and deprivation to be representative of adults aged 50 or  
9 more living in private households in England<sup>15</sup>. Participants are interviewed in their homes  
10 or care homes every two years about a wide range of health, economic and social topics. We  
11 used data collected from core participants who had been interviewed in any of four waves of  
12 ELSA from wave 2 in 2004-5 until wave 5 in 2010-11. Wave 2 was the first wave to include  
13 questions on receipt of quality-indicated healthcare, and information was not collected on  
14 every variable in every wave. Ethical approval was received from the London Multi-Centre  
15 Research Ethics Committee. We studied five common and important long-term conditions:  
16 angina, diabetes, depression, osteoarthritis, and cataract. Effective treatment is freely  
17 available for all five conditions from the National Health Service.

### 18 Variables

19 We collected data on illness burden, self-reported medical diagnosis and treatment of angina,  
20 cataract, depression, diabetes and osteoarthritis. The illness burden for angina was defined as  
21 grade 2 on the Rose Angina scale (pain or discomfort in chest when walking at an ordinary  
22 pace on the level on most occasions or more often, which makes subject stop or slow down if  
23 occurs while walking, and which then goes away within 10 minutes, and which includes  
24 either sternum (any level), or left arm and left anterior chest). Illness burden for diabetes was  
25 defined as a fasting HbA1c level of >7.5%<sup>16</sup>. Illness burden for depression was defined as a  
26 score of 3 or more on the eight-item Centre for Epidemiologic Studies Depression Scale  
27 (CES-D). The application of these standardised scales in ELSA has been described  
28 previously<sup>1</sup>. Illness burden for osteoarthritis was defined as self-reported pain in the hip or  
29 knee of 5 or more on a scale of 0 to 10<sup>17</sup>. Illness burden for cataract was defined broadly as  
30 reporting poor vision or blindness. Cataract is responsible for about a quarter of poor vision  
31 in the UK, so this measure is the least specific and includes those with other causes of poor  
32 vision, such as age-related macular degeneration, which is responsible for about a third of  
33 poor vision<sup>18,19</sup>.

34 A medical diagnosis was considered to exist if a participant answered 'yes' when asked  
35 whether a doctor had ever told them they had the condition of interest. For arthritis, a follow-  
36 up question asked whether they had been told they had osteoarthritis, rheumatoid or other  
37 arthritis.

38  
39 Treatment for depression and diabetes was defined by reported achievement of quality of care  
40 indicators, derived through a robust process of literature reviews, expert panel assessment and  
41 piloting<sup>20,21</sup>. For depression, the quality indicator was about receipt of treatment since the  
42 previous wave: '*if a person is diagnosed with clinical depression, then antidepressive*  
43 *treatment, talking treatment or electroconvulsive treatment should be offered within 2 weeks*  
44 *after diagnosis unless within that period the patient has improved, or unless the patient has*  
45 *substance abuse or dependence, in which case treatment may wait until 8 weeks after the*  
46 *patient is in a drug-or alcohol-free state*'. For diabetes, treatment was measurement of  
47 glycosylated haemoglobin or fructosamine levels in the preceding 12 months. Treatment for  
48 angina was defined as ever being offered or currently taking beta-blockers (ELSA variables  
49 hebeta or hebetc). Treatment for osteoarthritis and cataract were defined as reporting ever  
50 having had surgery for the condition. For osteoarthritis this excluded those with hips or knees  
51 replaced due to fracture. Data on hip and knee replacements were only available for  
52 respondents aged 60 and over, and so respondents aged less than 60 years (n= 3,186) were  
53 excluded from the analysis of osteoarthritis.



Wealth was defined as the sum of financial, physical and housing wealth plus state and private pension income. Age was categorised into three groups, 50-59 years, 60-74 years and 75 years and older.

### Analysis

We used two approaches to analysis, a main analysis using serial cross sectional data and then a subsidiary analysis using longitudinal data. Multivariable ~~binomial~~-logistic regression analysis was used, with the outcome variables defined as one of illness burden, ~~self-reported~~ medical diagnosis or treatment for each of the five conditions in each cross-sectional wave (STATA statistical software version 12.1). This regression analysis was repeated for each of the four waves of ELSA from 2004 to 2011 separately and then 'overall' for all four waves combined. For the 'overall' analysis, the data were reshaped into 'long' format in Stata statistical software, with each participant having a separate record for each wave. Intra-person correlation of outcomes was accounted for using robust adjustment with Stata, with each participant's unique identifier included in the regression equation as a cluster variable. Missing data were excluded from the analyses.

The independent variables were age group, sex and slope order of inequality. We used the slope order of inequality as an independent variable to estimate the relationship between the outcome measures and the categorised measure of wealth<sup>22,23</sup>. The slope order of inequality consisted of wealth quintiles with values of 0.1, 0.3, 0.5, 0.7 and 0.9, that is, the midpoints of each quintile on a scale of zero (least wealthy) to one (most wealthy). -The slope order of inequality was modelled as a continuous variable, ~~so that the slope or coefficient of a logit linear regression line across all five quintiles represents the difference in outcome between the hypothetically wealthiest and least wealthy participant. Exponentiating this slope coefficient results in an odds ratio, which is the ratio of the odds of the outcome in the wealthiest compared with the least wealthy participant and its odds ratio represents the ratio of the least wealthy compared with the wealthiest participant.~~ This odds ratio is also known as a relative index of inequality<sup>22</sup>. Advantages of this method of quantifying inequality are that it includes all participants, instead of just comparing the highest and lowest quintiles, it accounts for the number of participants in each category and it provides a single overall measure of inequality.

We included all participants in the main cross sectional analysis in order to compare the distribution of illness burden in the whole population with the distributions of diagnoses and treatments in the whole population. This meant that diagnosis was assessed even in those who did not meet the criteria for 'illness burden', and treatment was assessed even in those with no diagnosis. For the subsidiary analysis using longitudinal data, we estimated the odds ratio of receiving a diagnosis by a subsequent wave only for those who had met the criteria for 'illness burden' in a previous wave, and then the likelihood of receiving treatment only for those who had received a diagnosis in a previous wave. This was a subsidiary analysis as the numbers of participants that could be followed over time in this manner was small, particularly for treatment in angina and depression.

### Results

The whole sample (n=12,765) was composed of participants aged 50 years or more who had responded to at least one wave of ELSA from 2004-5 until 2010-11. The response rate in 2004-5 was 82%.<sup>24,25</sup> ~~In wave 5 (2010-11), o~~ver half ~~of the sample of 8,729~~ were women, or ~~were~~ aged between 60 and 74 years (Table 1). ~~Self-reported M~~medical diagnosis for all five conditions increased as wealth decreased, for example in depression from 4% in the

1  
2  
3  
4  
5  
6  
7 wealthiest quintile to 11% in the poorest (Table 1). There was little variation between the  
8 waves for each of the five conditions (Table 2).

9  
10 The hypothetically least wealthy participant had substantially higher odds than the  
11 hypothetically most wealthy of meeting the criteria for 'illness burden' from any of the five  
12 conditions at all four time points (overall odds ratios (OR) ranged from 4.2 to 15.1) (Table 3).  
13 The least wealthy participant also had higher odds of diagnosis (ORs 1.1 to 4.5) and either no  
14 different or relatively small odds of treatment (ORs 0.9 to 2.6) (Table 3, Figure 1).

15  
16 For angina, the overall odds ratio for meeting the criteria for 'illness burden' was 7.6,  
17 indicating that the hypothetically least wealthy individual was seven times more likely to  
18 have angina symptoms (defined by the Rose angina scale) than the wealthiest. The odds ratio  
19 for ~~self-reported~~ reported medical diagnosis was 4.5, suggesting that some less wealthy  
20 people with angina symptoms had not received a diagnosis of angina, as the expected odds  
21 ratio for equitably distributed diagnosis would have been 7.6. The odds ratio for treatment  
22 was 3.2, and again the expected odds ratios for equitably distributed treatment would have  
23 been 7.6. For depression, the overall odds ratio for illness burden was 6.4, for medical  
24 diagnosis was 3.3, and for treatment was 2.6, again suggesting that some poorer people with  
25 symptoms of depression were less likely to have received a diagnosis or indicated health care,  
26 as the expected odds ratios for equitably distributed treatment would have been 6.4.

27  
28 For diabetes, the overall odds ratio for illness burden was 4.2 and 4.0 for diagnosis,  
29 suggesting that for diabetes diagnosis was distributed equitably. However, the odds ratio for  
30 treatment was 0.9 and not statistically significantly different from 1, again suggesting that  
31 some less wealthy people with medically diagnosed diabetes had not received treatment, as  
32 the expected odds ratios for equitably distributed treatment would have been 4.2.

33  
34 The subsidiary analysis calculated the odds ratios of receiving a diagnosis by a subsequent  
35 wave only for those who had met the criteria for 'illness burden' for the relevant long term  
36 condition in a previous wave; and then the likelihood of receiving treatment only for those  
37 who had received a medical diagnosis in a previous wave. The substantial inequalities in the  
38 illness burden of conditions by wealth are identical to Table 3, as expected, and subsequently  
39 the numbers of eligible participants dwindle rapidly due to the nested nature of the analysis,  
40 with some wide confidence intervals and 9 out of 10 results not statistically significant  
41 (Supplemental file 1).  
42  
43  
44  
45  
46  
47  
48  
49  
50  
51  
52  
53  
54  
55  
56  
57  
58  
59  
60

**Table 1:** Characteristics of ELSA participants at wave 5 (2010-11) and self-reported medical diagnosis of angina, cataract, depression, diabetes and osteoarthritis.

|                  |         | Whole sample | Angina | Cataract | Depression | Diabetes | Osteoarthritis |
|------------------|---------|--------------|--------|----------|------------|----------|----------------|
|                  |         | N            | %      | %        | %          | %        | %              |
| Sex              | Male    | 3,886        | 8.2    | 13.4     | 5.4        | 13.3     | 19.8           |
|                  | Female  | 4,843        | 6.3    | 20.4     | 7.8        | 9.4      | 32.9           |
| Age (years)      | 50-59   | 1,906        | 2.2    | 3.7      | 10.1       | 7.2      | 17.1           |
|                  | 60-74   | 4,766        | 5.8    | 14.5     | 7.0        | 11.0     | 28.1           |
|                  | 75+     | 2,057        | 15.0   | 36.6     | 2.9        | 15.0     | 34.1           |
| Wealth quintile* | 1       | 1,716        | 3.4    | 13.8     | 4.1        | 6.0      | 21.5           |
|                  | 2       | 1,714        | 4.9    | 15.5     | 5.9        | 8.0      | 24.2           |
|                  | 3       | 1,723        | 6.6    | 20.1     | 5.7        | 11.3     | 25.7           |
|                  | 4       | 1,716        | 8.2    | 18.6     | 6.7        | 13.6     | 31.6           |
|                  | 5       | 1,715        | 12.9   | 19.2     | 11.5       | 16.7     | 33.1           |
|                  | missing | 145          | 5.5    | 9.7      | 4.8        | 9.7      | 20.0           |
| Total            |         | 8,729        | 7.2    | 17.3     | 6.7        | 11.1     | 27.1           |

\*1=wealthiest quintile, 5=least wealthy quintile

**Table 2.** Prevalence of illness burden, self-reported medical diagnosis, and treatment for angina, cataract, depression, diabetes and osteoarthritis in four waves of ELSA

|                          | Angina<br>N (%) | Cataract<br>N (%) | Depression<br>N (%) | Diabetes<br>N (%) | Osteoarthritis<br>N (%) |
|--------------------------|-----------------|-------------------|---------------------|-------------------|-------------------------|
| <b>Illness burden</b>    |                 |                   |                     |                   |                         |
| Wave 2 (2004-5)          | 397 (4.6)       | 308 (3.5)         | 2,037 (23.4)        | 160 (1.8)         | 1,106 (12.7)            |
| Wave 3 (2006-7)          | 300 (3.6)       | 317 (3.8)         | 1,929 (23.3)        | n/a               | 917 (11.1)              |
| Wave 4 (2008-9)          | 300 (3.1)       | 331 (3.5)         | 2,049 (21.4)        | 220 (2.3)         | 1,088 (11.4)            |
| Wave 5 (2010-11)         | 254 (2.9)       | 320 (3.7)         | 1,956 (22.4)        | n/a               | 1,046 (12.0)            |
| <b>Medical diagnosis</b> |                 |                   |                     |                   |                         |
| Wave 2 (2004-5)          | 668 (7.6)       | 1,050 (12.1)      | 402 (4.6)           | 715 (8.2)         | 1,861 (21.4)            |
| Wave 3 (2006-7)          | 591 (7.1)       | 1,294 (15.7)      | 490 (5.9)           | 935 (11.3)        | 1,952 (23.6)            |
| Wave 4 (2008-9)          | 645 (6.7)       | 1,421 (14.8)      | 601 (6.3)           | 1,215 (12.7)      | 2,262 (23.6)            |
| Wave 5 (2010-11)         | 655 (7.5)       | 1,566 (17.9)      | 602 (6.9)           | 1,413 (16.2)      | 2,416 (27.7)            |
| <b>Treatment</b>         |                 |                   |                     |                   |                         |
| Wave 2 (2004-5)          | 85 (1.0)        | 535 (6.2)         | 98 (1.1)            | 552 (6.4)         | 202 (2.3)               |
| Wave 3 (2006-7)          | n/a             | 379 (4.9)         | n/a                 | 618 (7.5)         | 141 (1.7)               |
| Wave 4 (2008-9)          | n/a             | 444 (4.6)         | 155 (1.6)           | 671 (7.0)         | 226 (2.4)               |
| Wave 5 (2010-11)         | 88 (1.0)        | 646 (7.4)         | n/a                 | 748 (8.6)         | 208 (2.4)               |

Total number of participants in each wave: wave 2: 8,688; wave 3: 8,268; wave 4: 9,578; wave 5: 8,729

n/a = data not available for that condition in that wave

**Table 3.** Illness burden, self-reported medical diagnosis and treatment of angina, cataract, depression, diabetes and osteoarthritis, comparing the least wealthy with the most wealthy: binomial logistic regression.

|                                       |                   | Angina                    | Cataract                  | Depression               | Diabetes                 | Osteoarthritis              |
|---------------------------------------|-------------------|---------------------------|---------------------------|--------------------------|--------------------------|-----------------------------|
| Odds ratios (95% confidence interval) |                   |                           |                           |                          |                          |                             |
| Wave 2*<br>(2004-5)                   | Illness burden    | <b>5.6</b><br>(3.8, 8.3)  | <b>7.2</b><br>(4.5, 11.5) | <b>5.1</b><br>(4.3, 6.2) | <b>4.4</b><br>(2.5, 8.0) | <b>11.0</b><br>(8.1, 14.9)  |
|                                       | Medical diagnosis | <b>2.9</b><br>(2.2, 3.9)  | <b>1.3</b><br>(1.0, 1.6)  | <b>4.8</b><br>(3.3, 7.0) | <b>3.1</b><br>(2.3, 4.2) | <b>1.6</b><br>(1.3, 2.0)    |
|                                       | Treatment         | <b>2.6</b><br>(1.2, 5.7)  | <b>1.5</b><br>(1.0, 2.2)  | 0.6<br>(0.1, 2.9)        | 0.7<br>(0.3, 1.5)        | 1.1<br>(0.7, 1.9)           |
| Wave 3*<br>(2006-7)                   | Illness burden    | <b>8.7</b><br>(5.5, 13.8) | <b>8.2</b><br>(5.1, 13.1) | <b>6.9</b><br>(5.7, 8.5) |                          | <b>12.7</b><br>(9.1, 17.8)  |
|                                       | Medical diagnosis | <b>4.9</b><br>(3.6, 6.8)  | <b>1.2</b><br>(1.0, 1.5)  | 0.7<br>(0.4, 1.4)        | <b>3.4</b><br>(2.6, 4.4) | <b>0.6</b><br>(0.4, 0.8)    |
|                                       | Treatment         |                           | 1.3<br>(0.8, 1.9)         |                          | 1.2<br>(0.6, 2.4)        | 1.0<br>(0.6, 1.9)           |
| Wave 4*<br>(2008-9)                   | Illness burden    | <b>6.7</b><br>(4.2, 10.5) | <b>5.5</b><br>(3.6, 8.6)  | <b>5.9</b><br>(4.9, 7.1) | <b>3.9</b><br>(2.4, 6.4) | <b>14.0</b><br>(10.3, 19.1) |
|                                       | Medical diagnosis | <b>4.3</b><br>(3.2, 5.9)  | 1.1<br>(0.9, 1.4)         | 0.7<br>(0.4, 1.2)        | <b>3.9</b><br>(3.1, 5.1) | <b>0.6</b><br>(0.4, 0.8)    |
|                                       | Treatment         |                           | 1.1<br>(0.7, 1.6)         | <b>2.4</b><br>(1.0, 5.9) | <b>0.2</b><br>(0.1, 0.6) | 1.0<br>(0.6, 1.6)           |
| Wave 5*<br>(2010-11)                  | Illness burden    | <b>8.4</b><br>(5.1, 13.7) | <b>6.2</b><br>(3.9, 9.9)  | <b>5.9</b><br>(4.8, 7.1) |                          | <b>16.0</b><br>(11.7, 21.8) |
|                                       | Medical diagnosis | <b>5.3</b><br>(3.9, 7.3)  | <b>1.3</b><br>(1.0, 1.5)  | <b>1.7</b><br>(1.0, 2.8) | <b>4.3</b><br>(3.4, 5.4) | <b>0.6</b><br>(0.4, 0.8)    |
|                                       | Treatment         | <b>3.3</b><br>(1.5, 7.3)  | <b>1.8</b><br>(1.2, 2.6)  |                          | 0.8<br>(0.4, 1.6)        | 1.2<br>(0.7, 2.0)           |
| Overall†                              | Illness burden    | <b>7.6</b><br>(5.4, 10.8) | <b>8.0</b><br>(5.4, 11.9) | <b>6.4</b><br>(5.5, 7.5) | <b>4.2</b><br>(2.6, 6.8) | <b>15.1</b><br>(11.4, 20.0) |
|                                       | Medical diagnosis | <b>4.5</b><br>(3.3, 6.0)  | <b>1.3</b><br>(1.1, 1.5)  | <b>3.3</b><br>(2.4, 4.5) | <b>4.0</b><br>(3.1, 5.2) | 1.1<br>(0.9, 1.3)           |
|                                       | Treatment         | <b>3.2</b><br>(1.7, 6.0)  | <b>1.3</b><br>(1.0, 1.8)  | <b>2.6</b><br>(1.1, 6.1) | 0.9<br>(0.5, 1.4)        | 1.2<br>(0.8, 1.6)           |

\*Odds ratios adjusted for age group and sex

†Odds ratios adjusted for age group, sex and unique participant identifier

\*\*Analyses for osteoarthritis excluded those younger than 60 years, as data on osteoarthritis treatment were only collected in those aged 60 or over.

Odds ratios where the 95% confidence intervals do not include 1 (before rounding to one decimal place) are shown in bold

**Figure 1.** Illness burden (in blue), self-reported medical diagnosis (in green), and treatment (in red) of angina, cataract, depression, diabetes and osteoarthritis, comparing the least wealthy with the most wealthy: Overall odds ratios (adjusted for age and sex) and 95% confidence bars (binomial regression)

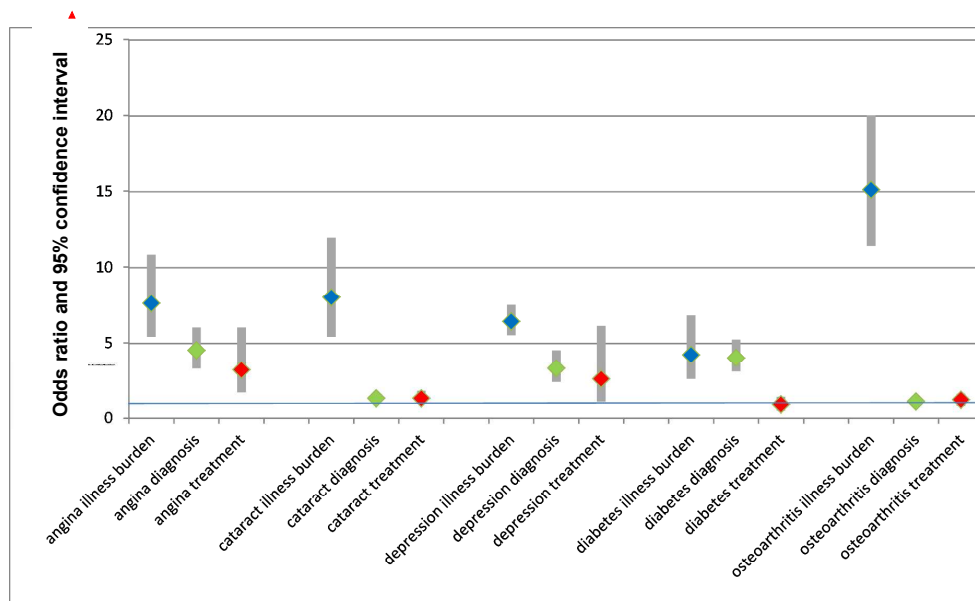

Formatted: Font: 9 pt, Bold

## Discussion

We found that while there were strong inverse associations between wealth and the burden of illness (based on validated scales, symptoms and biomarker) of a long-term condition, there were smaller or absent inequalities in receipt of self-reported medical diagnosis or treatment for the conditions considered. This suggests that the substantially higher illness burden in less wealthy participants was not matched by appropriately higher levels of diagnosis and treatment, and that equitable receipt of a medical diagnosis may have an important role in reducing inequalities in health.

ELSA is a unique single source of detailed longitudinal data on socioeconomic status and health, and this is the first study to compare inequalities in illness burden, self-reported medical diagnosis and treatment of long-term conditions in a longitudinal panel study on the same population over time. ELSA used robust measures of individual socio-economic position, and standardised scales and blood biomarker to assess health status. This exploratory study has some limitations and the results should be interpreted with caution and tested in subsequent research. Whilst standardised measures were used to estimate the illness burden of depression, angina and diabetes, symptoms alone were used for osteoarthritis and cataract, and the attributed symptoms were not specific for osteoarthritis and cataract. However, this lack of specificity is unlikely to vary with wealth, and so is not likely to be an important source of bias. Self-reported data may be a source of bias if self-report varies by factors other than objective health status, such as wealth or social experience. This is a recognised problem with some self-reported morbidity data, but is less of a problem with

1  
2  
3  
4  
5  
6  
7 | sensory assessment for measures of pain, which is essentially self-perceived, and where self-  
8 report is the best means of assessment <sup>26</sup>.

9  
10 We have not adjusted for health-related factors that are also more prevalent in poorer  
11 populations, such as smoking, obesity and comorbidity, because none of these are a reason  
12 for not making a diagnosis. Comorbid conditions are commoner in those with lower socio-  
13 economic status, but there is no evidence that comorbidities make a new diagnosis less likely.  
14 On the contrary, a higher number of comorbid conditions in older people may be associated  
15 with higher quality of care <sup>27</sup>. We found different patterns in different conditions, which fits  
16 with other research showing that wealth acts differently in different conditions, and for  
17 example, has no association with referral for post-menopausal bleeding <sup>28</sup>. Major national  
18 policy interventions such as the Quality and Outcomes Framework payment for performance  
19 scheme in primary care <sup>29</sup> have been associated with improved healthcare for included  
20 conditions such as angina and diabetes, more than for excluded conditions such osteoarthritis  
21 and poor vision <sup>30-32</sup>.

22 The serial cross-sectional analysis of 4 waves of ELSA included all eligible participants in  
23 each wave in order to maximise the sample size. This approach meant that some participants  
24 with a diagnosed condition would no longer have had symptoms or raised biomarkers, if they  
25 were being successfully treated. Examples would be diabetic participants whose blood sugar  
26 levels were being successfully controlled by treatment, and participants with successfully  
27 treated depression. We therefore checked our main results with the secondary (longitudinal)  
28 analysis, which assessed subsequent diagnosis in those had met the criteria for 'illness  
29 burden', and subsequent treatment in those with a medical diagnosis, but the number of  
30 participants who could be followed through the waves in this way was too small to allow  
31 meaningful conclusions to be drawn from the results.

32  
33 Our results fit with previous findings that a greater proportion of people in deprived groups  
34 had Rose angina, but there was no difference in the proportions receiving a general  
35 practitioner diagnosis of coronary heart disease <sup>14</sup>. Care-seeking behaviour and patient  
36 preferences may differ with wealth. Given the same information, patients may want fewer  
37 medical interventions than their doctors recommend <sup>33,34</sup>, and pessimism about availability of  
38 treatment may make older people reluctant to seek help <sup>35</sup>. Older people may view living with  
39 symptoms (such as pain, or emotional problems) as a normal part of ageing <sup>36</sup>. The response  
40 of the primary care physician may also vary with the wealth of the patient. For example, the  
41 physician might be more likely to consider symptoms of breathlessness as a medical problem  
42 requiring a diagnosis, whereas aches and pains, poor vision, and low mood might be  
43 considered part of the tapestry of life, or the natural ageing process. Comorbidity is more  
44 common in deprived populations, and may make diagnosis of all conditions harder for  
45 doctors within the constraints of a short consultation <sup>37</sup>.

46 At a system level, the results may be partially explained by wealthier people living in areas  
47 where there are more healthcare resources. Wennberg introduced the concept of 'supply-  
48 sensitive care' to describe how the quantity of healthcare resources allocated to a particular  
49 population was a major determinant of the frequency of use of health services by that  
50 population, and gives an example in which 'a doubling of the supply of internists or  
51 cardiologists results in roughly a halving of the interval between repeat visits' <sup>38,39</sup>. Where  
52 healthcare resources are relatively plentiful, patients with chronic diseases will consult more,  
53 use more diagnostic tests, and be referred to hospital more. Further research could helpfully  
54 investigate whether those missing out on diagnosis are not accessing health services, or are  
55

1  
2  
3  
4  
5  
6  
7 seeing a doctor but not being diagnosed. The participants were selected to be nationally  
8 representative of the population of England, and so the findings are likely to be generalisable  
9 to England, but not to countries with different healthcare systems. If validated, our findings  
10 that inequalities in receipt of diagnoses are potential barriers to equitable healthcare for five  
11 common long-term conditions, suggest that future policy interventions to reduce socio-  
12 economic inequalities in healthcare should consider improving access to diagnosis as well as  
13 treatment.

14  
15  
16  
17 **Funding statement:** This article presents independent research commissioned by the UK  
18 National Institute for Health Research (NIHR) under the Health Services Research  
19 programme: HSR Project 10/2002/06 – ‘The dynamics of quality: a national panel study of  
20 evidence-based standards’. IL’s work was supported by the NIHR Collaboration for Applied  
21 Health Research and Care (CLAHRC) for the South West Peninsula. The views expressed in  
22 this publication are those of the authors and not necessarily those of the NHS, the NIHR or  
23 the Department of Health.

24  
25 **Competing interests:** All authors have completed the ICMJE uniform disclosure form at  
26 [www.icmje.org/coi\\_disclosure.pdf](http://www.icmje.org/coi_disclosure.pdf) and declare: all authors had financial support from the  
27 National Institute for Health Research for the submitted work, DM had financial support from  
28 Age UK; no financial relationships with any organisations that might have an interest in the  
29 submitted work in the previous three years; no other relationships or activities that could  
30 appear to have influenced the submitted work.

31  
32 **Ethics approval:** The English Longitudinal Study of Ageing received ethics approval from  
33 the National Research Ethics Service: 09/H0505/124. Participants gave informed consent  
34 before taking part.

35  
36 **Contributors:** NS contributed to the study design, oversaw data analysis and interpretation,  
37 and drafted the paper. NS is guarantor. AH undertook data preparation, analysis and  
38 interpretation, and contributed to drafting the paper. LM undertook data preparation and  
39 analysis. MB and AC advised on statistical techniques. SR, JC and IL advised on data  
40 analysis and interpretation. DM contributed to the study design and advised on data analysis  
41 and interpretation. All authors contributed to data interpretation and revised the paper  
42 critically. Dave Stott and Amander Wellings, representatives of Public and Patient  
43 Involvement in Research (PPIRes), brought a helpful lay perspective to this research.

44  
45 **Data sharing:** The ELSA dataset and technical documentation are available from the UK  
46 Data Service at: <http://discover.ukdataservice.ac.uk/catalogue?sn=5050>.

### Reference List

- (1) Marmot M, Banks J, Blundell R, Lessof C, Nazroo J. Health, Wealth and Lifestyles of the Older Population in England: the 2002 English Longitudinal Study of Ageing. London: The Institute for Fiscal Studies; 2003.
- (2) Börsch-Supan A, Brugiavini A, Jürges H, Mackenbach J, Siegris J, Weber G. Health, Ageing and Retirement in Europe. First Results from the Survey of Health, Ageing and Retirement in Europe. Mannheim: Mannheim Research Institute for the Economics of Aging (MEA); 2005.
- (3) Hemingway H, Shipley M, Macfarlane P, Marmot M. Impact of socioeconomic status on coronary mortality in people with symptoms, electrocardiographic abnormalities, both or neither: the original Whitehall study 25 year follow up. *J Epidemiol Community Health* 2000; 54(7):510-516.
- (4) Wilkinson R, Marmot M. Social determinants of health: the solid facts. 2nd edition ed. Copenhagen: World Health Organisation; 2003.
- (5) McKeown T. The role of medicine: dream, mirage or nemesis? 1 ed. London: Nuffield Principal Hospital Trust; 1976.
- (6) Bunker JP. The role of medical care in contributing to health improvements within societies. *Int J Epidemiol* 2001; 30(6):1260-1263.
- (7) Watt G. The inverse care law today. *Lancet* 2002; 360:252-4.
- (8) Richards HM, Reid ME, Watt GCM. Socioeconomic variations in responses to chest pain: qualitative study. *BMJ* 2002; 324(7349):1308.
- (9) Gardner K, Chapple A. Barriers to referral in patients with angina: qualitative study. *BMJ* 1999; 319(7207):418-421.
- (10) Berger J, Mohr J. A fortunate man: the story of a country doctor. London: Penguin; 1967.
- (11) Tod AM, Read C, Lacey A, Abbott J. Barriers to uptake of services for coronary heart disease: qualitative. *BMJ* 2001; 323(7306):214.
- (12) Chaturvedi N, Ben Shlomo Y. From the surgery to the surgeon: does deprivation influence consultation and operation rates? *Br J Gen Pract* 1995; 45(392):127-131.
- (13) Mahomed NN, Barrett JA, Katz JN, Phillips CB, Losina E, Lew RA et al. Rates and outcomes of primary and revision total hip replacement in the United States medicare population. *J Bone Joint Surg Am* 2003; 85-A(1):27-32.
- (14) Richards H, McConnachie A, Morrison C, Murray K, Watt G. Social and gender variation in the prevalence, presentation and general practitioner provisional diagnosis of chest pain. *J Epidemiol Community Health* 2000; 54(9):714-718.
- (15) Natcen Social Research. English Longitudinal Study of Ageing (ELSA) Wave One to Wave Five User Guide. <http://www.esds.ac>



1  
2  
3  
4  
5  
6  
7  
8  
9  
10  
11  
12  
13  
14  
15  
16  
17  
18  
19  
20  
21  
22  
23  
24  
25  
26  
27  
28  
29  
30  
31  
32  
33  
34  
35  
36  
37  
38  
39  
40  
41  
42  
43  
44  
45  
46  
47  
48  
49  
50  
51  
52  
53  
54  
55  
56  
57  
58  
59  
60

uk/doc/5050/mrdoc/pdf/5050\_User\_Guide\_to\_the\_ELSA\_Datasets\_Waves\_1\_to\_5  
pdf [ 2012 [cited 2013 Sept. 28];

- (16) Scholes S, Taylor R, Cheshire H, Cox K, Lessof C. Retirement, health and relationships of the older population in England: The 2004 English Longitudinal Study of Ageing. Technical Report P2808. London: National Centre for Social Research; 2008.
- (17) Steel N, Melzer D, Gardener E, McWilliams B. Need for and receipt of hip and knee replacement--a national population survey. *Rheumatology* 2006;(45):1437-1441.
- (18) Evans JR, Fletcher AE, Wormald RPL, Siu-Woon Ng E, Sterling S, Smeeth L et al. Prevalence of partial sight and blindness in people aged 75 years and older in Britain: results from the MRC trial of assessment and management of older people in the community. *Br J Ophthalmol* 2002; 86:795-800.
- (19) Congdon N, O'Colmain B, Klaver CCW, Klein R, Munoz B, Friedman DS et al. Causes and Prevalence of Partial sight and blindness among adults in the United States. *Arch Ophthalmol* 2004; 122:477-485.
- (20) Steel N, Melzer D, Shekelle PG, Wenger NS, Forsyth D, McWilliams BC. Developing quality indicators for older adults: transfer from the USA to the UK is feasible. *Quality and Safety in Health Care* 2004; 13(4):260-264.
- (21) Steel N, Bachmann M, Maisey S, Shekelle P, Breeze E, Marmot M et al. Self reported receipt of care consistent with 32 quality indicators: National population survey of adults aged 50 or more in England. *BMJ* 2008; 337:a957.
- (22) Wagstaff A, Paci P, Van Doorslaer E. On the measurement of inequalities in health. *Soc Sci Med* 1991; 33(5):545-557.
- (23) Bachmann MO, Eachus J, Hopper CD, Davey SG, Propper C, Pearson NJ et al. Socio-economic inequalities in diabetes complications, control, attitudes and health service use: a cross-sectional study. *Diabet Med* 2003; 20(11):921-929.
- (24) Banks J, Breeze E, Lessof C, Nazroo J. Retirement, health and relationships of the older population in England: The 2004 English Longitudinal Study of Ageing (Wave 2). London: The Institute for Fiscal Studies; 2006.
- (25) Cheshire H, Hussey D, Medina J, Pickering K, Wood N, Ward K et al. Financial circumstances, health and well-being of the older population in England: The 2008 English Longitudinal Study of Ageing. Wave 4 Technical Report. London: National Centre for Social Research; 2012.
- (26) Sen A. Health: perception versus observation. *BMJ* 2002; 324(7342):860-861.
- (27) Min LC, Reuben DB, MacLean CH, Shekelle PG, Solomon DH, Higashi T et al. Predictors of Overall Quality of Care Provided to Vulnerable Older People. *J Am Geriatr Soc* 2005; 53(10):1705-1711.
- (28) McBride D, Hardoon S, Walters K, Gilmour S, Raine R. Explaining variation in referral from primary to secondary care: cohort study. *BMJ* 2010; 341.

- 1  
2  
3  
4  
5  
6  
7 (29) NHS Employers and the General Practitioners Committee. Quality and Outcomes  
8 Framework for 2012/13. Guidance for PCOs and practices. London: NHS Employers;  
9 2012.
- 10 (30) Gillam S, Steel N. The Quality and Outcomes Framework: where next? BMJ 2013;  
11 346.
- 12 (31) Gillam SJ, Siriwardena AN, Steel N. Pay-for-Performance in the United Kingdom:  
13 Impact of the Quality and Outcomes Framework - A Systematic Review. The Annals  
14 of Family Medicine 2012; 10(5):461-468.
- 15 (32) Steel N, Maisey S, Clark A, Fleetcroft R, Howe A. Quality of clinical primary care  
16 and targeted incentive payments: an observational study. Br J Gen Pract  
17 2007;(57):449-454.
- 18 (33) Steel N. Thresholds for taking antihypertensive drugs in different professional and lay  
19 groups: questionnaire survey. BMJ 2000; 320:1446-7.
- 20 (34) Montgomery AA, Fahey T. How do patients' treatment preferences compare with  
21 those of clinicians? Quality in health care 2001; 10 (Suppl I):i39-i43.
- 22 (35) Sanders C, Donovan JL, Dieppe PA. Unmet need for joint replacement: a qualitative  
23 investigation of barriers to treatment among individuals with severe pain and  
24 disability of the hip and knee. Rheumatology 2004; 43(3):353-357.
- 25 (36) Murray J, Banerjee S, Byng R, Tylee A, Bhugra D, Macdonald A. Primary care  
26 professionals' perceptions of depression in older people: a qualitative study. Social  
27 Science & Medicine 2006; 63:1363-73.
- 28 (37) Mercer SW, Guthrie B, Furler J, Watt G, Tudor Hart J. Multimorbidity and the  
29 inverse care law in primary care. BMJ 2012; 344.
- 30 (38) Wennberg JE. Understanding Geographic Variations in Health Care Delivery. The  
31 New England Journal of Medicine 1999; 340(1):52-53.
- 32 (39) Wennberg JE. Unwarranted variations in healthcare delivery: implications for  
33 academic medical centres. BMJ 2002; 325(7370):961-964.
- 34  
35  
36  
37  
38  
39  
40  
41  
42  
43  
44  
45  
46  
47  
48  
49  
50  
51  
52  
53  
54  
55  
56  
57  
58  
59  
60

1  
2  
3  
4  
5  
6  
7  
8  
9  
10  
11  
12  
13  
14  
15  
16  
17  
18  
19  
20  
21  
22  
23  
24  
25  
26  
27  
28  
29  
30  
31  
32  
33  
34  
35  
36  
37  
38  
39  
40  
41  
42  
43  
44  
45  
46  
47  
48  
49  
50  
51  
52  
53  
54  
55  
56  
57  
58  
59  
60

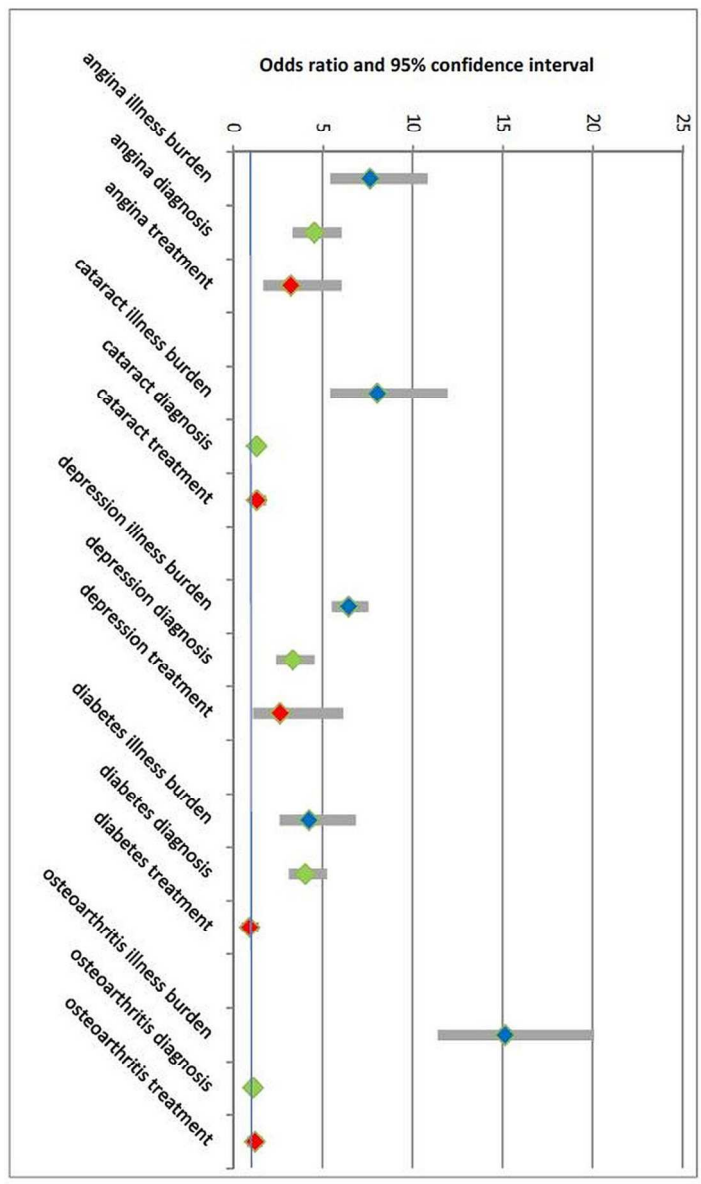

90x139mm (300 x 300 DPI)

## Supplemental file 1

**Supplemental Table 1.** Odds ratios for meeting the ‘illness burden’ criteria for angina, cataract, depression, diabetes and osteoarthritis, medical diagnosis for those estimated to have a condition, and treatment for those with a diagnosis, comparing the least wealthy with the most wealthy: binomial regression

| Condition      | Adjusted odds ratios* (95% CI) |                                  |                       |                 |
|----------------|--------------------------------|----------------------------------|-----------------------|-----------------|
|                | Illness burden<br>(Wave 3)     | Medical<br>diagnosis<br>(Wave 4) | Treatment<br>(Wave 5) | N in treatment† |
| Angina         | <b>8.7</b> (5.5, 13.8)         | 1.4 (0.5, 4.0)                   | 1.6 (0.3, 9.0)        | 11              |
| Cataract       | <b>8.2</b> (5.1, 13.1)         | 1.0 (0.3, 3.1)                   | <b>2.2</b> (1.2, 3.8) | 83              |
| Osteoarthritis | <b>12.7</b> (9.1, 17.8)        | 0.7 (0.3, 1.6)                   | 0.7 (0.3, 1.6)        | 30              |
|                | Adjusted odds ratios* (95% CI) |                                  |                       |                 |
|                | Illness burden<br>(Wave 2)     | Medical<br>diagnosis<br>(Wave 3) | Treatment<br>(Wave 4) | N in treatment† |
| Depression     | <b>5.1</b> (4.3, 6.2)          | 0.4 (0.1, 1.4)                   | 17.3 (0.5, 604)       | 12              |
| Diabetes       | <b>4.4</b> (2.5, 8.0)          | 0.1 (0.0, 3.6)                   | 0.5 (0.2, 1.1)        | 99              |

\*adjusted for age group and sex

†followed through the waves

Waves used in analysis were the most recent with available data

Odds ratios where the 95% confidence intervals do not include 1 (before rounding to one decimal place) are shown in bold

STROBE 2007 (v4) Statement—Checklist of items that should be included in reports of cross-sectional studies

| Section/Topic             | Item # | Recommendation                                                                                                                                                                       | Reported on page # |
|---------------------------|--------|--------------------------------------------------------------------------------------------------------------------------------------------------------------------------------------|--------------------|
| Title and abstract        | 1      | (a) Indicate the study’s design with a commonly used term in the title or the abstract                                                                                               | 1&2                |
|                           |        | (b) Provide in the abstract an informative and balanced summary of what was done and what was found                                                                                  | 2                  |
| <b>Introduction</b>       |        |                                                                                                                                                                                      |                    |
| Background/rationale      | 2      | Explain the scientific background and rationale for the investigation being reported                                                                                                 | 4                  |
| Objectives                | 3      | State specific objectives, including any prespecified hypotheses                                                                                                                     | 4                  |
| <b>Methods</b>            |        |                                                                                                                                                                                      |                    |
| Study design              | 4      | Present key elements of study design early in the paper                                                                                                                              | 4-6                |
| Setting                   | 5      | Describe the setting, locations, and relevant dates, including periods of recruitment, exposure, follow-up, and data collection                                                      | 4-5                |
| Participants              | 6      | (a) Give the eligibility criteria, and the sources and methods of selection of participants                                                                                          | 4-6                |
| Variables                 | 7      | Clearly define all outcomes, exposures, predictors, potential confounders, and effect modifiers. Give diagnostic criteria, if applicable                                             | 5                  |
| Data sources/ measurement | 8*     | For each variable of interest, give sources of data and details of methods of assessment (measurement). Describe comparability of assessment methods if there is more than one group | 5                  |
| Bias                      | 9      | Describe any efforts to address potential sources of bias                                                                                                                            | 6                  |
| Study size                | 10     | Explain how the study size was arrived at                                                                                                                                            | 6                  |
| Quantitative variables    | 11     | Explain how quantitative variables were handled in the analyses. If applicable, describe which groupings were chosen and why                                                         | 6                  |
| Statistical methods       | 12     | (a) Describe all statistical methods, including those used to control for confounding                                                                                                | 6                  |
|                           |        | (b) Describe any methods used to examine subgroups and interactions                                                                                                                  | 6                  |
|                           |        | (c) Explain how missing data were addressed                                                                                                                                          | 6                  |
|                           |        | (d) If applicable, describe analytical methods taking account of sampling strategy                                                                                                   | 6                  |
|                           |        | (e) Describe any sensitivity analyses                                                                                                                                                | 6                  |
| <b>Results</b>            |        |                                                                                                                                                                                      |                    |

1  
2  
3  
4  
5  
6  
7  
8  
9  
10  
11  
12  
13  
14  
15  
16  
17  
18  
19  
20  
21  
22  
23  
24  
25  
26  
27  
28  
29  
30  
31  
32  
33  
34  
35  
36  
37  
38  
39  
40  
41  
42  
43  
44  
45  
46  
47  
48  
49

|                          |     |                                                                                                                                                                                                              |       |
|--------------------------|-----|--------------------------------------------------------------------------------------------------------------------------------------------------------------------------------------------------------------|-------|
| Participants             | 13* | (a) Report numbers of individuals at each stage of study—eg numbers potentially eligible, examined for eligibility, confirmed eligible, included in the study, completing follow-up, and analysed            | 6-8   |
|                          |     | (b) Give reasons for non-participation at each stage                                                                                                                                                         | 6-8   |
|                          |     | (c) Consider use of a flow diagram                                                                                                                                                                           |       |
| Descriptive data         | 14* | (a) Give characteristics of study participants (eg demographic, clinical, social) and information on exposures and potential confounders                                                                     | 7     |
|                          |     | (b) Indicate number of participants with missing data for each variable of interest                                                                                                                          |       |
| Outcome data             | 15* | Report numbers of outcome events or summary measures                                                                                                                                                         | 8     |
| Main results             | 16  | (a) Give unadjusted estimates and, if applicable, confounder-adjusted estimates and their precision (eg, 95% confidence interval). Make clear which confounders were adjusted for and why they were included | 7-9   |
|                          |     | (b) Report category boundaries when continuous variables were categorized                                                                                                                                    | 7     |
|                          |     | (c) If relevant, consider translating estimates of relative risk into absolute risk for a meaningful time period                                                                                             |       |
| Other analyses           | 17  | Report other analyses done—eg analyses of subgroups and interactions, and sensitivity analyses                                                                                                               | 7     |
| <b>Discussion</b>        |     |                                                                                                                                                                                                              |       |
| Key results              | 18  | Summarise key results with reference to study objectives                                                                                                                                                     | 10    |
| Limitations              | 19  | Discuss limitations of the study, taking into account sources of potential bias or imprecision. Discuss both direction and magnitude of any potential bias                                                   | 10-11 |
| Interpretation           | 20  | Give a cautious overall interpretation of results considering objectives, limitations, multiplicity of analyses, results from similar studies, and other relevant evidence                                   | 11    |
| Generalisability         | 21  | Discuss the generalisability (external validity) of the study results                                                                                                                                        | 11-12 |
| <b>Other information</b> |     |                                                                                                                                                                                                              |       |
| Funding                  | 22  | Give the source of funding and the role of the funders for the present study and, if applicable, for the original study on which the present article is based                                                | 12    |

\*Give information separately for cases and controls in case-control studies and, if applicable, for exposed and unexposed groups in cohort and cross-sectional studies.

**Note:** An Explanation and Elaboration article discusses each checklist item and gives methodological background and published examples of transparent reporting. The STROBE checklist is best used in conjunction with this article (freely available on the Web sites of PLoS Medicine at <http://www.plosmedicine.org/>, Annals of Internal Medicine at <http://www.annals.org/>, and Epidemiology at <http://www.epidem.com/>). Information on the STROBE Initiative is available at [www.strobe-statement.org](http://www.strobe-statement.org).

# BMJ Open

## Economic inequalities in burden of illness, diagnosis and treatment of five long-term conditions in England: panel study.

|                                 |                                                                                                                                                                                                                                                                                                                                                                                                                                                                                                                                             |
|---------------------------------|---------------------------------------------------------------------------------------------------------------------------------------------------------------------------------------------------------------------------------------------------------------------------------------------------------------------------------------------------------------------------------------------------------------------------------------------------------------------------------------------------------------------------------------------|
| Journal:                        | <i>BMJ Open</i>                                                                                                                                                                                                                                                                                                                                                                                                                                                                                                                             |
| Manuscript ID:                  | bmjopen-2014-005530.R2                                                                                                                                                                                                                                                                                                                                                                                                                                                                                                                      |
| Article Type:                   | Research                                                                                                                                                                                                                                                                                                                                                                                                                                                                                                                                    |
| Date Submitted by the Author:   | 01-Sep-2014                                                                                                                                                                                                                                                                                                                                                                                                                                                                                                                                 |
| Complete List of Authors:       | Steel, Nicholas; University of East Anglia<br>Hardcastle, Antonia; University of East Anglia, Norwich Medical School<br>Bachmann, Max; Univeristy of East Anglia, School of Medicine, Health Policy and Practic<br>Richards, Suzanne; University of Exeter Medical School,<br>Mounce, Luke; University of Exeter Medical School,<br>Clark, Allan; University of East Anglia, Norwich Medical School<br>Lang, Iain; PenCLAHRC,<br>Melzer, David; University of Exeter Medical School,<br>Campbell, John; University of Exeter, Primary Care; |
| <b>Primary Subject Heading</b>: | Health services research                                                                                                                                                                                                                                                                                                                                                                                                                                                                                                                    |
| Secondary Subject Heading:      | Health services research, Epidemiology, Public health, Sociology                                                                                                                                                                                                                                                                                                                                                                                                                                                                            |
| Keywords:                       | Quality in health care < HEALTH SERVICES ADMINISTRATION & MANAGEMENT, EPIDEMIOLOGY, Health policy < HEALTH SERVICES ADMINISTRATION & MANAGEMENT                                                                                                                                                                                                                                                                                                                                                                                             |
|                                 |                                                                                                                                                                                                                                                                                                                                                                                                                                                                                                                                             |

SCHOLARONE™  
Manuscripts

1  
2  
3  
4 **Economic inequalities in burden of illness, diagnosis and**  
5 **treatment of five long-term conditions in England: panel study.**  
6  
7  
8

9  
10 Steel N, Hardcastle A, Bachmann MO, Richards S, Mounce L, Clark A, Lang I, Melzer D,  
11 Campbell J.

12  
13 N Steel, Clinical Reader<sup>1</sup>

14 AC Hardcastle, Senior Research Associate<sup>1</sup>

15 MO Bachmann, Professor of Health Services Research<sup>1</sup>

16 S H Richards, Senior Lecturer<sup>2</sup>

17 LTA Mounce, Research Associate<sup>2</sup>

18 A Clark, Senior Lecturer<sup>1</sup>

19 I Lang, Senior Lecturer in Public Health<sup>3</sup>

20 D Melzer, Professor of Epidemiology and Public Health<sup>2</sup>

21 J Campbell, Professor of General Practice and Primary Care<sup>2</sup>

22  
23  
24 <sup>1</sup>Population Health and Primary Care, Norwich Medical School, University of East Anglia,  
25 Norwich NR4 7TJ

26  
27 <sup>2</sup>University of Exeter Medical School, Smeall Building, St Luke's Campus, Exeter, EX1 2LU

28  
29 <sup>3</sup>NIHR CLAHRC South West Peninsula, Veysey Building, Salmon Pool Lane, Exeter, EX2  
30 4SG

31  
32  
33 Corresponding author: Nicholas Steel

34 [n.steel@uea.ac.uk](mailto:n.steel@uea.ac.uk)

35 01603 591161  
36  
37  
38  
39  
40  
41  
42  
43  
44  
45  
46  
47  
48  
49  
50  
51  
52  
53  
54  
55  
56  
57  
58  
59  
60



## Abstract

### Objective:

We compared the distribution by wealth of self-reported illness burden (estimated from validated scales, biomarker and reported symptoms) for angina, cataract, depression, diabetes and osteoarthritis, with the distribution of self-reported medical diagnosis and treatment. We aimed to determine if the greater illness burden borne by poorer participants was matched by appropriately higher levels of diagnosis and treatment.

### Design:

The English Longitudinal Study of Ageing, a panel study of 12,765 participants aged 50 years and older in four waves from 2004 to 2011, selected using a stratified random sample of households in England. Distribution of illness burden, diagnosis and treatment by wealth was estimated using regression analysis.

### Outcome measures:

The main outcome measures were odds ratios (ORs) for the illness burden, diagnosis and treatment respectively, adjusted for age, sex and wealth. We estimated the illness burden for angina with the Rose Angina scale, diabetes with fasting glycosylated haemoglobin, depression with the Centre for Epidemiologic Studies Depression Scale, osteoarthritis with self-reported pain and disability, and cataract with self-reported poor vision. Medical diagnoses were self-reported for all conditions. Treatment was defined as beta-blocker prescription for angina, surgery for osteoarthritis and cataract, and receipt of pre-defined effective interventions for diabetes and depression.

### Results:

Compared to the wealthiest, the least wealthy participant had substantially higher odds for illness burden from any of the five conditions at all four time points, with odds ratios ranging from 4.2 (95% confidence interval 2.6 to 6.8) for diabetes to 15.1 (11.4 to 20.0) for osteoarthritis. The odds ratios for diagnosis and treatment were smaller in all 5 conditions, and ranged from 0.9 (0.5 to 1.4) for diabetes treatment to 4.5 (3.3 to 6.0) for angina diagnosis.

### Conclusions:

The substantially higher illness burden in less wealthy participants was not matched by appropriately higher levels of diagnosis and treatment.

## Strengths and limitations of this study

- The English Longitudinal Study of Ageing (ELSA) is a unique single source of detailed data on socioeconomic status and health, and this is the first study to compare inequalities in illness burden, self-reported medical diagnosis and treatment of long-term conditions in a panel study over time
- Highly detailed measures of individual wealth were used alongside standardised scales and blood biomarker to assess the illness burden of depression, angina and diabetes
- Standardised scales were not included in ELSA for osteoarthritis and cataract, so assessment of illness burden for these two conditions was based on attributed symptoms which were not specific for osteoarthritis and cataract
- The study used self-reported data collected using an extensively tested structured questionnaire, but no information from medical records was collected
- An analysis of pooled data from 4 waves of ELSA was used to maximise the sample size, and the main finding that less wealthy participants are relatively underdiagnosed requires validation in a larger longitudinal study.

## Main text

### Introduction

Poverty is associated with poor health, poor access to health care and poor health outcomes in many countries and across different health care systems<sup>1-3</sup>. Much of this variation is caused by recognised broad social determinants of health<sup>4</sup>. Considerable political effort has been directed at attempts to narrow health inequalities by reducing poverty and social exclusion. However, as health care has become more effective at improving health, its potential contribution to ameliorating health inequalities has increased. McKeown demonstrated in the 1970s that health services had contributed little to health improvement<sup>5</sup>, but the same claim could not be made today. The past 30 years have seen the introduction of a wide range of effective interventions, particularly for the prevention and management of chronic disease<sup>6</sup>. Yet although these new interventions improve health, they are not necessarily applied equally across the population. Health inequalities will widen if effective services are offered, or taken up, with greater frequency by wealthier than less wealthy people. The reverse is also true, however, and there is an opportunity for healthcare to reduce social inequalities if it reaches those most in need<sup>7</sup>.

Little is known about pathways into poor health. The National Health Service provides medical care free at point-of-need to all UK residents, but there is scope for inequalities to occur in the pathway from identification of early symptoms through diagnosis and on to effective treatment. Individuals in more deprived social groups may be more reluctant to present to doctors with their symptoms and so may not receive a diagnosis<sup>8,9</sup>. Diagnosis is a key step that has meaning for both patient and physician in all health systems, and 'diagnostic confusion' may act as a barrier to health care for vulnerable populations<sup>10,8,11</sup>. Previous studies have found socio-economic variation in either diagnosis or treatment rates, but have not been able to compare inequalities in illness burden, rates of diagnosis and treatment modalities in the same population<sup>12-14</sup>.

The English Longitudinal Study of Ageing (ELSA) provides new data that can be used to identify barriers to equitable receipt of healthcare, and constitutes a unique source of information on illness burden, self-reported medical diagnosis and treatment. Other data sources cover symptoms, or diagnosis, or treatment, but no other single source covers all three. ELSA collects data on symptoms and validated markers of common health conditions, as well as diagnosis and treatment. It also contains detailed socio-demographic information, including direct measures of personal wealth, on a sample selected to be representative of the population of England aged 50 years and older. These data can be used to compare socio-economic inequalities for several conditions, providing insight into a healthcare system with no direct financial barriers to treatment (the National Health Service in England). We aimed to assess socio-economic inequalities in the burden of illness (estimated by validated scales, biomarker, and reported symptoms) of angina, cataract, depression, diabetes and osteoarthritis, and compare them with inequalities in self-reported medical diagnosis and treatment, in order to determine whether key components of health care were received equitably.

### Methods

We obtained data from the ELSA cohort, an interview survey of a sample of the population aged 50 years or older in England. The sample was selected from households that had

1  
2  
3 previously responded to the Health Survey for England, and drawn from selected postcode  
4 sectors stratified by health authority and deprivation to be representative of adults aged 50 or  
5 more living in private households in England<sup>15</sup>. Participants are interviewed in their homes  
6 or care homes every two years about a wide range of health, economic and social topics. We  
7 used data collected from core participants who had been interviewed in any of four waves of  
8 ELSA from wave 2 in 2004-5 until wave 5 in 2010-11. Wave 2 was the first wave to include  
9 questions on receipt of quality-indicated healthcare, and information was not collected on  
10 every variable in every wave. Ethical approval was received from the London Multi-Centre  
11 Research Ethics Committee. We studied five common and important long-term conditions:  
12 angina, diabetes, depression, osteoarthritis, and cataract. Effective treatment is freely  
13 available for all five conditions from the National Health Service.  
14  
15

### 16 Variables

17 We collected data on illness burden, self-reported medical diagnosis and treatment of angina,  
18 cataract, depression, diabetes and osteoarthritis. The illness burden for angina was defined as  
19 grade 2 on the Rose Angina scale (pain or discomfort in chest when walking at an ordinary  
20 pace on the level on most occasions or more often, which makes subject stop or slow down if  
21 occurs while walking, and which then goes away within 10 minutes, and which includes  
22 either sternum (any level), or left arm and left anterior chest). Illness burden for diabetes was  
23 defined as a fasting HbA1c level of >7.5%<sup>16</sup>. Illness burden for depression was defined as a  
24 score of 3 or more on the eight-item Centre for Epidemiologic Studies Depression Scale  
25 (CES-D). The application of these standardised scales in ELSA has been described  
26 previously<sup>1</sup>. Illness burden for osteoarthritis was defined as self-reported pain in the hip or  
27 knee of 5 or more on a scale of 0 to 10<sup>17</sup>. Illness burden for cataract was defined broadly as  
28 reporting poor vision or blindness. Cataract is responsible for about a quarter of poor vision  
29 in the UK, so this measure is the least specific and includes those with other causes of poor  
30 vision, such as age-related macular degeneration, which is responsible for about a third of  
31 poor vision<sup>18,19</sup>.  
32  
33  
34

35 A medical diagnosis was considered to exist if a participant answered 'yes' when asked  
36 whether a doctor had ever told them they had the condition of interest. For arthritis, a follow-  
37 up question asked whether they had been told they had osteoarthritis, rheumatoid or other  
38 arthritis.  
39

40 Treatment for depression and diabetes was defined by reported achievement of quality of care  
41 indicators, derived through a robust process of literature reviews, expert panel assessment and  
42 piloting<sup>20,21</sup>. For depression, the quality indicator was about receipt of treatment since the  
43 previous wave: *'if a person is diagnosed with clinical depression, then antidepressive  
44 treatment, talking treatment or electroconvulsive treatment should be offered within 2 weeks  
45 after diagnosis unless within that period the patient has improved, or unless the patient has  
46 substance abuse or dependence, in which case treatment may wait until 8 weeks after the  
47 patient is in a drug-or alcohol-free state'*. For diabetes, treatment was measurement of  
48 glycosylated haemoglobin or fructosamine levels in the preceding 12 months. Treatment for  
49 angina was defined as ever being offered or currently taking beta-blockers (ELSA variables  
50 hebeta or hebetc). Treatment for osteoarthritis and cataract were defined as reporting ever  
51 having had surgery for the condition. For osteoarthritis this excluded those with hips or knees  
52 replaced due to fracture. Data on hip and knee replacements were only available for  
53 respondents aged 60 and over, and so respondents aged less than 60 years (n= 3,186) were  
54 excluded from the analysis of osteoarthritis.  
55  
56  
57  
58  
59  
60

Wealth was defined as the sum of financial, physical and housing wealth plus state and private pension income. Age was categorised into three groups, 50-59 years, 60-74 years and 75 years and older.

### Analysis

We used two approaches to analysis, a main analysis using serial cross sectional data and then a subsidiary analysis using longitudinal data. Multivariable logistic regression analysis was used, with the outcome variables defined as one of illness burden, self-reported medical diagnosis or treatment for each of the five conditions in each cross-sectional wave (STATA statistical software version 12.1). This regression analysis was repeated for each of the four waves of ELSA from 2004 to 2011 separately and then 'overall' for all four waves combined. For the 'overall' analysis, the data were reshaped into 'long' format in Stata statistical software, with each participant having a separate record for each wave. Intra-person correlation of outcomes was accounted for using robust adjustment with Stata, with each participant's unique identifier included in the regression equation as a cluster variable. Missing data were excluded from the analyses.

The independent variables were age group, sex and slope order of inequality. We used the slope order of inequality as an independent variable to estimate the relationship between the outcome measures and the categorised measure of wealth<sup>22,23</sup>. The slope order of inequality consisted of wealth quintiles with values of 0.1, 0.3, 0.5, 0.7 and 0.9, that is, the midpoints of each quintile on a scale of zero (least wealthy) to one (most wealthy). The slope order of inequality was modelled as a continuous variable, so that the slope or coefficient of a logit linear regression line across all five quintiles represents the difference in outcome between the hypothetically wealthiest and least wealthy participant. Exponentiating this slope coefficient results in an odds ratio, which is the ratio of the odds of the outcome in the wealthiest compared with the least wealthy participant. This odds ratio is also known as a relative index of inequality<sup>22</sup>. Advantages of this method of quantifying inequality are that it includes all participants, instead of just comparing the highest and lowest quintiles, it accounts for the number of participants in each category and it provides a single overall measure of inequality.

We included all participants in the main cross sectional analysis in order to compare the distribution of illness burden in the whole population with the distributions of diagnoses and treatments in the whole population. This meant that diagnosis was assessed even in those who did not meet the criteria for 'illness burden', and treatment was assessed even in those with no diagnosis. For the subsidiary analysis using longitudinal data, we estimated the odds ratio of receiving a diagnosis by a subsequent wave only for those who had met the criteria for 'illness burden' in a previous wave, and then the likelihood of receiving treatment only for those who had received a diagnosis in a previous wave. This was a subsidiary analysis as the numbers of participants that could be followed over time in this manner was small, particularly for treatment in angina and depression.

### Results

The whole sample (n=12,765) was composed of participants aged 50 years or more who had responded to at least one wave of ELSA from 2004-5 until 2010-11. The response rate in 2004-5 was 82%.<sup>24,25</sup> In wave 5 (2010-11), self-reported medical diagnosis for all five conditions increased as wealth decreased, for example in depression from 4% in the wealthiest quintile to 11% in the poorest (Table 1). There was little variation between the waves for each of the five conditions (Table 2).

1  
2  
3  
4 The hypothetically least wealthy participant had substantially higher odds than the  
5 hypothetically most wealthy of meeting the criteria for 'illness burden' from any of the five  
6 conditions at all four time points (overall odds ratios (OR) ranged from 4.2 to 15.1) (Table 3).  
7 The least wealthy participant also had higher odds of diagnosis (ORs 1.1 to 4.5) and either no  
8 different or relatively small odds of treatment (ORs 0.9 to 2.6) (Table 3, Figure 1).  
9

10  
11 For angina, the overall odds ratio for meeting the criteria for 'illness burden' was 7.6,  
12 indicating that the hypothetically least wealthy individual was seven times more likely to  
13 have angina symptoms (defined by the Rose angina scale) than the wealthiest. The odds ratio  
14 for self-reported medical diagnosis was 4.5, suggesting that some less wealthy people with  
15 angina symptoms had not received a diagnosis of angina, as the expected odds ratio for  
16 equitably distributed diagnosis would have been 7.6. The odds ratio for treatment was 3.2,  
17 and again the expected odds ratios for equitably distributed treatment would have been 7.6.  
18 For depression, the overall odds ratio for illness burden was 6.4, for medical diagnosis was  
19 3.3, and for treatment was 2.6, again suggesting that some poorer people with symptoms of  
20 depression were less likely to have received a diagnosis or indicated health care, as the  
21 expected odds ratios for equitably distributed treatment would have been 6.4.  
22  
23

24 For diabetes, the overall odds ratio for illness burden was 4.2 and 4.0 for diagnosis,  
25 suggesting that for diabetes diagnosis was distributed equitably. However, the odds ratio for  
26 treatment was 0.9 and not statistically significantly different from 1, again suggesting that  
27 some less wealthy people with medically diagnosed diabetes had not received treatment, as  
28 the expected odds ratios for equitably distributed treatment would have been 4.2.  
29  
30

31 The subsidiary analysis calculated the odds ratios of receiving a diagnosis by a subsequent  
32 wave only for those who had met the criteria for 'illness burden' for the relevant long term  
33 condition in a previous wave; and then the likelihood of receiving treatment only for those  
34 who had received a medical diagnosis in a previous wave. The substantial inequalities in the  
35 illness burden of conditions by wealth are identical to Table 3, as expected, and subsequently  
36 the numbers of eligible participants dwindle rapidly due to the nested nature of the analysis,  
37 with some wide confidence intervals and 9 out of 10 results not statistically significant  
38 (Supplemental file 1).  
39  
40  
41  
42  
43  
44  
45  
46  
47  
48  
49  
50  
51  
52  
53  
54  
55  
56  
57  
58  
59  
60

**Table 1:** Characteristics of ELSA participants at wave 5 (2010-11) and self-reported medical diagnosis of angina, cataract, depression, diabetes and osteoarthritis.

|                  |         | <b>Whole sample</b> | <b>Angina</b> | <b>Cataract</b> | <b>Depression</b> | <b>Diabetes</b> | <b>Osteoarthritis</b> |
|------------------|---------|---------------------|---------------|-----------------|-------------------|-----------------|-----------------------|
|                  |         | <b>N</b>            | <b>%</b>      | <b>%</b>        | <b>%</b>          | <b>%</b>        | <b>%</b>              |
| Sex              | Male    | 3,886               | 8.2           | 13.4            | 5.4               | 13.3            | 19.8                  |
|                  | Female  | 4,843               | 6.3           | 20.4            | 7.8               | 9.4             | 32.9                  |
| Age (years)      | 50-59   | 1,906               | 2.2           | 3.7             | 10.1              | 7.2             | 17.1                  |
|                  | 60-74   | 4,766               | 5.8           | 14.5            | 7.0               | 11.0            | 28.1                  |
|                  | 75+     | 2,057               | 15.0          | 36.6            | 2.9               | 15.0            | 34.1                  |
| Wealth quintile* | 1       | 1,716               | 3.4           | 13.8            | 4.1               | 6.0             | 21.5                  |
|                  | 2       | 1,714               | 4.9           | 15.5            | 5.9               | 8.0             | 24.2                  |
|                  | 3       | 1,723               | 6.6           | 20.1            | 5.7               | 11.3            | 25.7                  |
|                  | 4       | 1,716               | 8.2           | 18.6            | 6.7               | 13.6            | 31.6                  |
|                  | 5       | 1,715               | 12.9          | 19.2            | 11.5              | 16.7            | 33.1                  |
|                  | missing | 145                 | 5.5           | 9.7             | 4.8               | 9.7             | 20.0                  |
| Total            |         | 8,729               | 7.2           | 17.3            | 6.7               | 11.1            | 27.1                  |

\*1=wealthiest quintile, 5=least wealthy quintile

**Table 2.** Prevalence of illness burden, self-reported medical diagnosis, and treatment for angina, cataract, depression, diabetes and osteoarthritis in four waves of ELSA

|                                                                                                       | <b>Angina</b> | <b>Cataract</b> | <b>Depression</b> | <b>Diabetes</b> | <b>Osteoarthritis</b> |
|-------------------------------------------------------------------------------------------------------|---------------|-----------------|-------------------|-----------------|-----------------------|
|                                                                                                       | <b>N (%)</b>  | <b>N (%)</b>    | <b>N (%)</b>      | <b>N (%)</b>    | <b>N (%)</b>          |
| <b>Illness burden</b>                                                                                 |               |                 |                   |                 |                       |
| Wave 2 (2004-5)                                                                                       | 397 (4.6)     | 308 (3.5)       | 2,037 (23.4)      | 160 (1.8)       | 1,106 (12.7)          |
| Wave 3 (2006-7)                                                                                       | 300 (3.6)     | 317 (3.8)       | 1,929 (23.3)      | n/a             | 917 (11.1)            |
| Wave 4 (2008-9)                                                                                       | 300 (3.1)     | 331 (3.5)       | 2,049 (21.4)      | 220 (2.3)       | 1,088 (11.4)          |
| Wave 5 (2010-11)                                                                                      | 254 (2.9)     | 320 (3.7)       | 1,956 (22.4)      | n/a             | 1,046 (12.0)          |
| <b>Medical diagnosis</b>                                                                              |               |                 |                   |                 |                       |
| Wave 2 (2004-5)                                                                                       | 668 (7.6)     | 1,050 (12.1)    | 402 (4.6)         | 715 (8.2)       | 1,861 (21.4)          |
| Wave 3 (2006-7)                                                                                       | 591 (7.1)     | 1,294 (15.7)    | 490 (5.9)         | 935 (11.3)      | 1,952 (23.6)          |
| Wave 4 (2008-9)                                                                                       | 645 (6.7)     | 1,421 (14.8)    | 601 (6.3)         | 1,215 (12.7)    | 2,262 (23.6)          |
| Wave 5 (2010-11)                                                                                      | 655 (7.5)     | 1,566 (17.9)    | 602 (6.9)         | 1,413 (16.2)    | 2,416 (27.7)          |
| <b>Treatment</b>                                                                                      |               |                 |                   |                 |                       |
| Wave 2 (2004-5)                                                                                       | 85 (1.0)      | 535 (6.2)       | 98 (1.1)          | 552 (6.4)       | 202 (2.3)             |
| Wave 3 (2006-7)                                                                                       | n/a           | 379 (4.9)       | n/a               | 618 (7.5)       | 141 (1.7)             |
| Wave 4 (2008-9)                                                                                       | n/a           | 444 (4.6)       | 155 (1.6)         | 671 (7.0)       | 226 (2.4)             |
| Wave 5 (2010-11)                                                                                      | 88 (1.0)      | 646 (7.4)       | n/a               | 748 (8.6)       | 208 (2.4)             |
| Total number of participants in each wave: wave 2: 8,688; wave 3: 8,268; wave 4: 9,578; wave 5: 8,729 |               |                 |                   |                 |                       |
| n/a = data not available for that condition in that wave                                              |               |                 |                   |                 |                       |

**Table 3.** Illness burden, self-reported medical diagnosis and treatment of angina, cataract, depression, diabetes and osteoarthritis, comparing the least wealthy with the most wealthy: logistic regression.

|                                       |                   | Angina                    | Cataract                  | Depression               | Diabetes                 | Osteoarthritis              |
|---------------------------------------|-------------------|---------------------------|---------------------------|--------------------------|--------------------------|-----------------------------|
| Odds ratios (95% confidence interval) |                   |                           |                           |                          |                          |                             |
| Wave 2*<br>(2004-5)                   | Illness burden    | <b>5.6</b><br>(3.8, 8.3)  | <b>7.2</b><br>(4.5, 11.5) | <b>5.1</b><br>(4.3, 6.2) | <b>4.4</b><br>(2.5, 8.0) | <b>11.0</b><br>(8.1, 14.9)  |
|                                       | Medical diagnosis | <b>2.9</b><br>(2.2, 3.9)  | <b>1.3</b><br>(1.0, 1.6)  | <b>4.8</b><br>(3.3, 7.0) | <b>3.1</b><br>(2.3, 4.2) | <b>1.6</b><br>(1.3, 2.0)    |
|                                       | Treatment         | <b>2.6</b><br>(1.2, 5.7)  | <b>1.5</b><br>(1.0, 2.2)  | 0.6<br>(0.1, 2.9)        | 0.7<br>(0.3, 1.5)        | 1.1<br>(0.7, 1.9)           |
| Wave 3*<br>(2006-7)                   | Illness burden    | <b>8.7</b><br>(5.5, 13.8) | <b>8.2</b><br>(5.1, 13.1) | <b>6.9</b><br>(5.7, 8.5) |                          | <b>12.7</b><br>(9.1, 17.8)  |
|                                       | Medical diagnosis | <b>4.9</b><br>(3.6, 6.8)  | <b>1.2</b><br>(1.0, 1.5)  | 0.7<br>(0.4, 1.4)        | <b>3.4</b><br>(2.6, 4.4) | <b>0.6</b><br>(0.4, 0.8)    |
|                                       | Treatment         |                           | 1.3<br>(0.8, 1.9)         |                          | 1.2<br>(0.6, 2.4)        | 1.0<br>(0.6, 1.9)           |
| Wave 4*<br>(2008-9)                   | Illness burden    | <b>6.7</b><br>(4.2, 10.5) | <b>5.5</b><br>(3.6, 8.6)  | <b>5.9</b><br>(4.9, 7.1) | <b>3.9</b><br>(2.4, 6.4) | <b>14.0</b><br>(10.3, 19.1) |
|                                       | Medical diagnosis | <b>4.3</b><br>(3.2, 5.9)  | 1.1<br>(0.9, 1.4)         | 0.7<br>(0.4, 1.2)        | <b>3.9</b><br>(3.1, 5.1) | <b>0.6</b><br>(0.4, 0.8)    |
|                                       | Treatment         |                           | 1.1<br>(0.7, 1.6)         | <b>2.4</b><br>(1.0, 5.9) | <b>0.2</b><br>(0.1, 0.6) | 1.0<br>(0.6, 1.6)           |
| Wave 5*<br>(2010-11)                  | Illness burden    | <b>8.4</b><br>(5.1, 13.7) | <b>6.2</b><br>(3.9, 9.9)  | <b>5.9</b><br>(4.8, 7.1) |                          | <b>16.0</b><br>(11.7, 21.8) |
|                                       | Medical diagnosis | <b>5.3</b><br>(3.9, 7.3)  | <b>1.3</b><br>(1.0, 1.5)  | <b>1.7</b><br>(1.0, 2.8) | <b>4.3</b><br>(3.4, 5.4) | <b>0.6</b><br>(0.4, 0.8)    |
|                                       | Treatment         | <b>3.3</b><br>(1.5, 7.3)  | <b>1.8</b><br>(1.2, 2.6)  |                          | 0.8<br>(0.4, 1.6)        | 1.2<br>(0.7, 2.0)           |
| Overall†                              | Illness burden    | <b>7.6</b><br>(5.4, 10.8) | <b>8.0</b><br>(5.4, 11.9) | <b>6.4</b><br>(5.5, 7.5) | <b>4.2</b><br>(2.6, 6.8) | <b>15.1</b><br>(11.4, 20.0) |
|                                       | Medical diagnosis | <b>4.5</b><br>(3.3, 6.0)  | <b>1.3</b><br>(1.1, 1.5)  | <b>3.3</b><br>(2.4, 4.5) | <b>4.0</b><br>(3.1, 5.2) | 1.1<br>(0.9, 1.3)           |
|                                       | Treatment         | <b>3.2</b><br>(1.7, 6.0)  | <b>1.3</b><br>(1.0, 1.8)  | <b>2.6</b><br>(1.1, 6.1) | 0.9<br>(0.5, 1.4)        | 1.2<br>(0.8, 1.6)           |

\*Odds ratios adjusted for age group and sex

†Odds ratios adjusted for age group, sex and unique participant identifier

\*\*Analyses for osteoarthritis excluded those younger than 60 years, as data on osteoarthritis treatment were only collected in those aged 60 or over.

Statistically significant odds ratios (where the 95% confidence intervals do not include 1 before rounding to one decimal place) are shown in bold



1  
2  
3 **Figure 1.** Illness burden (in blue), self-reported medical diagnosis (in green), and treatment  
4 (in red) of angina, cataract, depression, diabetes and osteoarthritis, comparing the least  
5 wealthy with the most wealthy: Overall odds ratios (adjusted for age and sex) and 95%  
6 confidence bars: logistic regression  
7

8  
9 INSERT FIGURE 1 HERE

## 10 11 **Discussion**

12 We found that while there were strong inverse associations between wealth and the burden of  
13 illness (based on validated scales, symptoms and biomarker) of a long-term condition, there  
14 were smaller or absent inequalities in receipt of self-reported medical diagnosis or treatment  
15 for the conditions considered. This suggests that the substantially higher illness burden in less  
16 wealthy participants was not matched by appropriately higher levels of diagnosis and  
17 treatment, and that equitable receipt of a medical diagnosis may have an important role in  
18 reducing inequalities in health.  
19

20  
21 ELSA is a unique single source of detailed data on socioeconomic status and health, and this  
22 is the first study to compare inequalities in illness burden, self-reported medical diagnosis and  
23 treatment of long-term conditions in a panel study over time. ELSA used robust measures of  
24 individual socio-economic position, and standardised scales and blood biomarker to assess  
25 health status. This exploratory study has some limitations and the results should be  
26 interpreted with caution and tested in subsequent research. Whilst standardised measures  
27 were used to estimate the illness burden of depression, angina and diabetes, symptoms alone  
28 were used for osteoarthritis and cataract, and the attributed symptoms were not specific for  
29 osteoarthritis and cataract. However, this lack of specificity is unlikely to vary with wealth,  
30 and so is not likely to be an important source of bias. Self-reported data may be a source of  
31 bias if self-report varies by factors other than objective health status, such as wealth or social  
32 experience. This is a recognised problem with some self-reported morbidity data, but is less  
33 of a problem with sensory assessment for pain, which is essentially self-perceived, and  
34 where self-report is the best means of assessment <sup>26</sup>.  
35  
36

37  
38 We have not adjusted for health-related factors that are also more prevalent in poorer  
39 populations, such as smoking, obesity and comorbidity, because none of these are a reason  
40 for not making a diagnosis. Comorbid conditions are commoner in those with lower socio-  
41 economic status, but there is no evidence that comorbidities make a new diagnosis less likely.  
42 On the contrary, a higher number of comorbid conditions in older people may be associated  
43 with higher quality of care <sup>27</sup>. We found different patterns in different conditions, which fits  
44 with other research showing that wealth acts differently in different conditions, and for  
45 example, has no association with referral for post-menopausal bleeding <sup>28</sup>. Major national  
46 policy interventions such as the Quality and Outcomes Framework payment for performance  
47 scheme in primary care <sup>29</sup> have been associated with improved healthcare for included  
48 conditions such as angina and diabetes, more than for excluded conditions such osteoarthritis  
49 and poor vision <sup>30-32</sup>.  
50  
51

52 The serial cross-sectional analysis of 4 waves of ELSA included all eligible participants in  
53 each wave in order to maximise the sample size. This approach meant that some participants  
54 with a diagnosed condition would no longer have had symptoms or raised biomarkers, if they  
55 were being successfully treated. Examples would be diabetic participants whose blood sugar  
56 levels were being successfully controlled by treatment, and participants with successfully  
57 treated depression. We therefore checked our main results with the secondary (longitudinal)  
58  
59  
60

1  
2  
3 analysis, which assessed subsequent diagnosis in those had met the criteria for ‘illness  
4 burden’, and subsequent treatment in those with a medical diagnosis, but the number of  
5 participants who could be followed through the waves in this way was too small to allow  
6 meaningful conclusions to be drawn from the results.  
7

8  
9 Our results fit with previous findings that a greater proportion of people in deprived groups  
10 had Rose angina, but there was no difference in the proportions receiving a general  
11 practitioner diagnosis of coronary heart disease<sup>14</sup>. Care-seeking behaviour and patient  
12 preferences may differ with wealth. Given the same information, patients may want fewer  
13 medical interventions than their doctors recommend<sup>33,34</sup> and pessimism about availability of  
14 treatment may make older people reluctant to seek help<sup>35</sup>. Older people may view living with  
15 symptoms (such as pain, or emotional problems) as a normal part of ageing<sup>36</sup>. The response  
16 of the primary care physician may also vary with the wealth of the patient. For example, the  
17 physician might be more likely to consider symptoms of breathlessness as a medical problem  
18 requiring a diagnosis, whereas aches and pains, poor vision, and low mood might be  
19 considered part of the tapestry of life, or the natural ageing process. Comorbidity is more  
20 common in deprived populations, and may make diagnosis of all conditions harder for  
21 doctors within the constraints of a short consultation<sup>37</sup>.  
22  
23

24 At a system level, the results may be partially explained by wealthier people living in areas  
25 where there are more healthcare resources. Wennberg introduced the concept of ‘supply-  
26 sensitive care’ to describe how the quantity of healthcare resources allocated to a particular  
27 population was a major determinant of the frequency of use of health services by that  
28 population, and gives an example in which ‘a doubling of the supply of internists or  
29 cardiologists results in roughly a halving of the interval between repeat visits’<sup>38,39</sup>. Where  
30 healthcare resources are relatively plentiful, patients with chronic diseases will consult more,  
31 use more diagnostic tests, and be referred to hospital more. Further research could helpfully  
32 investigate whether those missing out on diagnosis are not accessing health services, or are  
33 seeing a doctor but not being diagnosed. The participants were selected to be nationally  
34 representative of the population of England, and so the findings are likely to be generalisable  
35 to England, but not to countries with different healthcare systems. If validated, our findings  
36 that inequalities in receipt of diagnoses are potential barriers to equitable healthcare for five  
37 common long-term conditions, suggest that future policy interventions to reduce socio-  
38 economic inequalities in healthcare should consider improving access to diagnosis as well as  
39 treatment.  
40  
41  
42  
43  
44  
45  
46  
47  
48  
49  
50  
51  
52  
53  
54  
55  
56  
57  
58  
59  
60

1  
2  
3  
4 **Funding statement:** This article presents independent research commissioned by the UK  
5 National Institute for Health Research (NIHR) under the Health Services Research  
6 programme: HSR Project 10/2002/06 – ‘The dynamics of quality: a national panel study of  
7 evidence-based standards’. IL’s work was supported by the NIHR Collaboration for Applied  
8 Health Research and Care (CLAHRC) for the South West Peninsula. The views expressed in  
9 this publication are those of the authors and not necessarily those of the NHS, the NIHR or  
10 the Department of Health.  
11

12  
13 **Competing interests:** All authors have completed the ICMJE uniform disclosure form at  
14 [www.icmje.org/coi\\_disclosure.pdf](http://www.icmje.org/coi_disclosure.pdf) and declare: all authors had financial support from the  
15 National Institute for Health Research for the submitted work, DM had financial support from  
16 Age UK; no financial relationships with any organisations that might have an interest in the  
17 submitted work in the previous three years; no other relationships or activities that could  
18 appear to have influenced the submitted work.  
19

20  
21 **Ethics approval:** The English Longitudinal Study of Ageing received ethics approval from  
22 the National Research Ethics Service: 09/H0505/124. Participants gave informed consent  
23 before taking part.  
24

25 **Contributors:** NS contributed to the study design, oversaw data analysis and interpretation,  
26 and drafted the paper. NS is guarantor. AH undertook data preparation, analysis and  
27 interpretation, and contributed to drafting the paper. LM undertook data preparation and  
28 analysis. MB and AC advised on statistical techniques. SR, JC and IL advised on data  
29 analysis and interpretation. DM contributed to the study design and advised on data analysis  
30 and interpretation. All authors contributed to data interpretation and revised the paper  
31 critically.  
32

33  
34 **Acknowledgements:** Dave Stott and Amander Wellings, representatives of Public and  
35 Patient Involvement in Research (PPIRes), brought a helpful lay perspective to this research.  
36

37 **Data sharing:** The ELSA dataset and technical documentation are available from the UK  
38 Data Service at: <http://discover.ukdataservice.ac.uk/catalogue?sn=5050>.  
39  
40  
41  
42  
43  
44  
45  
46  
47  
48  
49  
50  
51  
52  
53  
54  
55  
56  
57  
58  
59  
60

## Reference List

- 1  
2  
3  
4  
5 (1) Marmot M, Banks J, Blundell R, et al. Health, Wealth and Lifestyles of the Older  
6 Population in England: the 2002 English Longitudinal Study of Ageing. London: The  
7 Institute for Fiscal Studies; 2003.  
8
- 9  
10 (2) Börsch-Supan A, Brugiavini A, Jürges H, et al. Health, Ageing and Retirement in  
11 Europe. First Results from the Survey of Health, Ageing and Retirement in Europe.  
12 Mannheim: Mannheim Research Institute for the Economics of Aging (MEA); 2005.  
13
- 14 (3) Hemingway H, Shipley M, Macfarlane P, et al. Impact of socioeconomic status on  
15 coronary mortality in people with symptoms, electrocardiographic abnormalities, both  
16 or neither: the original Whitehall study 25 year follow up. *J Epidemiol Community*  
17 *Health* 2000; 54(7):510-516.  
18
- 19 (4) Wilkinson R, Marmot M. Social determinants of health: the solid facts. 2nd edition  
20 ed. Copenhagen: World Health Organisation; 2003.  
21
- 22 (5) McKeown T. The role of medicine: dream, mirage or nemesis? 1 ed. London:  
23 Nuffield Principal Hospital Trust; 1976.  
24
- 25 (6) Bunker JP. The role of medical care in contributing to health improvements within  
26 societies. *Int J Epidemiol* 2001; 30(6):1260-1263.  
27
- 28 (7) Watt G. The inverse care law today. *Lancet* 2002; 360:252-4.  
29
- 30 (8) Richards HM, Reid ME, Watt GCM. Socioeconomic variations in responses to chest  
31 pain: qualitative study. *BMJ* 2002; 324(7349):1308.  
32
- 33 (9) Gardner K, Chapple A. Barriers to referral in patients with angina: qualitative study.  
34 *BMJ* 1999; 319(7207):418-421.  
35
- 36 (10) Berger J, Mohr J. A fortunate man: the story of a country doctor. London: Penguin;  
37 1967.  
38
- 39 (11) Tod AM, Read C, Lacey A, et al. Barriers to uptake of services for coronary heart  
40 disease: qualitative. *BMJ* 2001; 323(7306):214.  
41
- 42 (12) Chaturvedi N, Ben Shlomo Y. From the surgery to the surgeon: does deprivation  
43 influence consultation and operation rates? *Br J Gen Pract* 1995; 45(392):127-131.  
44
- 45 (13) Mahomed NN, Barrett JA, Katz JN, et al. Rates and outcomes of primary and revision  
46 total hip replacement in the United States medicare population. *J Bone Joint Surg Am*  
47 2003; 85-A(1):27-32.  
48
- 49 (14) Richards H, McConnachie A, Morrison C, et al. Social and gender variation in the  
50 prevalence, presentation and general practitioner provisional diagnosis of chest pain. *J*  
51 *Epidemiol Community Health* 2000; 54(9):714-718.  
52
- 53 (15) Natcen Social Research. English Longitudinal Study of Ageing (ELSA) Wave One to  
54 Wave Five User Guide. <http://www.esds.ac>  
55  
56  
57  
58  
59  
60

1  
2  
3 uk/doc/5050/mrdoc/pdf/5050\_User\_Guide\_to\_the\_ELSA\_Datasets\_Waves\_1\_to\_5  
4 pdf [ 2012 [cited 2013 Sept. 28];  
5

- 6 (16) Scholes S, Taylor R, Cheshire H, et al. Retirement, health and relationships of the  
7 older population in England: The 2004 English Longitudinal Study of Ageing.  
8 Technical Report P2808. London: National Centre for Social Research; 2008.  
9
- 10 (17) Steel N, Melzer D, Gardener E, McWilliams B. Need for and receipt of hip and knee  
11 replacement--a national population survey. *Rheumatology* 2006;(45):1437-1441.  
12
- 13 (18) Evans JR, Fletcher AE, Wormald RPL, et al. Prevalence of partial sight and blindness  
14 in people aged 75 years and older in Britain: results from the MRC trial of assessment  
15 and management of older people in the community. *Br J Ophthalmol* 2002; 86:795-  
16 800.  
17
- 18 (19) Congdon N, O'Colmain B, Klaver CCW, et al. Causes and Prevalence of Partial sight  
19 and blindness among adults in the United States. *Arch Ophthalmol* 2004; 122:477-  
20 485.  
21
- 22 (20) Steel N, Melzer D, Shekelle PG, et al. Developing quality indicators for older adults:  
23 transfer from the USA to the UK is feasible. *Quality and Safety in Health Care* 2004;  
24 13(4):260-264.  
25
- 26 (21) Steel N, Bachmann M, Maisey S, et al. Self reported receipt of care consistent with 32  
27 quality indicators: National population survey of adults aged 50 or more in England.  
28 *BMJ* 2008; 337:a957.  
29
- 30 (22) Wagstaff A, Paci P, Van Doorslaer E. On the measurement of inequalities in health.  
31 *Soc Sci Med* 1991; 33(5):545-557.  
32
- 33 (23) Bachmann MO, Eachus J, Hopper CD, et al. Socio-economic inequalities in diabetes  
34 complications, control, attitudes and health service use: a cross-sectional study.  
35 *Diabet Med* 2003; 20(11):921-929.  
36
- 37 (24) Banks J, Breeze E, Lessof C, et al. Retirement, health and relationships of the older  
38 population in England: The 2004 English Longitudinal Study of Ageing (Wave 2).  
39 London: The Institute for Fiscal Studies; 2006.  
40
- 41 (25) Cheshire H, Hussey D, Medina J, et al. Financial circumstances, health and well-  
42 being of the older population in England: The 2008 English Longitudinal Study of  
43 Ageing. Wave 4 Technical Report. London: National Centre for Social Research;  
44 2012.  
45
- 46 (26) Sen A. Health: perception versus observation. *BMJ* 2002; 324(7342):860-861.  
47
- 48 (27) Min LC, Reuben DB, MacLean CH, et al. Predictors of Overall Quality of Care  
49 Provided to Vulnerable Older People. *J Am Geriatr Soc* 2005; 53(10):1705-1711.  
50
- 51 (28) McBride D, Hardoon S, Walters K, et al. Explaining variation in referral from  
52 primary to secondary care: cohort study. *BMJ* 2010; 341.  
53  
54  
55  
56  
57  
58  
59  
60

- 1  
2  
3 (29) NHS Employers and the General Practitioners Committee. Quality and Outcomes  
4 Framework for 2012/13. Guidance for PCOs and practices. London: NHS Employers;  
5 2012.  
6  
7 (30) Gillam S, Steel N. The Quality and Outcomes Framework: where next? BMJ 2013;  
8 346.  
9  
10 (31) Gillam SJ, Siriwardena AN, Steel N. Pay-for-Performance in the United Kingdom:  
11 Impact of the Quality and Outcomes Framework - A Systematic Review. The Annals  
12 of Family Medicine 2012; 10(5):461-468.  
13  
14 (32) Steel N, Maisey S, Clark A, et al. Quality of clinical primary care and targeted  
15 incentive payments: an observational study. Br J Gen Pract 2007;(57):449-454.  
16  
17 (33) Steel N. Thresholds for taking antihypertensive drugs in different professional and lay  
18 groups: questionnaire survey. BMJ 2000; 320:1446-7.  
19  
20 (34) Montgomery AA, Fahey T. How do patients' treatment preferences compare with  
21 those of clinicians? Quality in health care 2001; 10 (Suppl I):i39-i43.  
22  
23 (35) Sanders C, Donovan JL, Dieppe PA. Unmet need for joint replacement: a qualitative  
24 investigation of barriers to treatment among individuals with severe pain and  
25 disability of the hip and knee. Rheumatology 2004; 43(3):353-357.  
26  
27 (36) Murray J, Banerjee S, Byng R, et al. Primary care professionals' perceptions of  
28 depression in older people: a qualitative study. Social Science & Medicine 2006;  
29 63:1363-73.  
30  
31 (37) Mercer SW, Guthrie B, Furler J, et al. Multimorbidity and the inverse care law in  
32 primary care. BMJ 2012; 344.  
33  
34 (38) Wennberg JE. Understanding Geographic Variations in Health Care Delivery. The  
35 New England Journal of Medicine 1999; 340(1):52-53.  
36  
37 (39) Wennberg JE. Unwarranted variations in healthcare delivery: implications for  
38 academic medical centres. BMJ 2002; 325(7370):961-964.  
39  
40  
41  
42  
43  
44  
45  
46  
47  
48  
49  
50  
51  
52  
53  
54  
55  
56  
57  
58  
59  
60

1  
2  
3  
4 **Economic inequalities in burden of illness, diagnosis and**  
5 **treatment of five long-term conditions in England: panel study.**  
6  
7  
8

9  
10 Steel N, Hardcastle A, Bachmann MO, Richards S, Mounce L, Clark A, Lang I, Melzer D,  
11 Campbell J.

12  
13 N Steel, Clinical Reader<sup>1</sup>

14 AC Hardcastle, Senior Research Associate<sup>1</sup>

15 MO Bachmann, Professor of Health Services Research<sup>1</sup>

16 S H Richards, Senior Lecturer<sup>2</sup>

17 LTA Mounce, Research Associate<sup>2</sup>

18 A Clark, Senior Lecturer<sup>1</sup>

19 I Lang, Senior Lecturer in Public Health<sup>3</sup>

20 D Melzer, Professor of Epidemiology and Public Health<sup>2</sup>

21 J Campbell, Professor of General Practice and Primary Care<sup>2</sup>

22  
23  
24 <sup>1</sup>Population Health and Primary Care, Norwich Medical School, University of East Anglia,  
25 Norwich NR4 7TJ

26  
27 <sup>2</sup>University of Exeter Medical School, Smeall Building, St Luke's Campus, Exeter, EX1 2LU

28  
29 <sup>3</sup>NIHR CLAHRC South West Peninsula, Veysey Building, Salmon Pool Lane, Exeter, EX2  
30 4SG

31  
32  
33 Corresponding author: Nicholas Steel

34 [n.steel@uea.ac.uk](mailto:n.steel@uea.ac.uk)

35 01603 591161  
36  
37  
38  
39  
40  
41  
42  
43  
44  
45  
46  
47  
48  
49  
50  
51  
52  
53  
54  
55  
56  
57  
58  
59  
60

## Abstract

### Objective:

We compared the distribution by wealth of self-reported illness burden (estimated from validated scales, biomarker and reported symptoms) for angina, cataract, depression, diabetes and osteoarthritis, with the distribution of self-reported medical diagnosis and treatment. We aimed to determine if the greater illness burden borne by poorer participants was matched by appropriately higher levels of diagnosis and treatment.

### Design:

The English Longitudinal Study of Ageing, a panel study of 12,765 participants aged 50 years and older in four waves from 2004 to 2011, selected using a stratified random sample of households in England. Distribution of illness burden, diagnosis and treatment by wealth was estimated using regression analysis.

### Outcome measures:

The main outcome measures were odds ratios (ORs) for the illness burden, diagnosis and treatment respectively, adjusted for age, sex and wealth. We estimated the illness burden for angina with the Rose Angina scale, diabetes with fasting glycosylated haemoglobin, depression with the Centre for Epidemiologic Studies Depression Scale, osteoarthritis with self-reported pain and disability, and cataract with self-reported poor vision. Medical diagnoses were self-reported for all conditions. Treatment was defined as beta-blocker prescription for angina, surgery for osteoarthritis and cataract, and receipt of pre-defined effective interventions for diabetes and depression.

### Results:

Compared to the wealthiest, the least wealthy participant had substantially higher odds for illness burden from any of the five conditions at all four time points, with odds ratios ranging from 4.2 (95% confidence interval 2.6 to 6.8) for diabetes to 15.1 (11.4 to 20.0) for osteoarthritis. The odds ratios for diagnosis and treatment were smaller in all 5 conditions, and ranged from 0.9 (0.5 to 1.4) for diabetes treatment to 4.5 (3.3 to 6.0) for angina diagnosis.

### Conclusions:

The substantially higher illness burden in less wealthy participants was not matched by appropriately higher levels of diagnosis and treatment.



## Strengths and limitations of this study

- The English Longitudinal Study of Ageing (ELSA) is a unique single source of detailed ~~longitudinal~~ data on socioeconomic status and health, and this is the first study to compare inequalities in illness burden, self-reported medical diagnosis and treatment of long-term conditions in a ~~longitudinal~~ panel study over time
- Highly detailed measures of individual wealth were used alongside standardised scales and blood biomarker to assess the illness burden of depression, angina and diabetes
- Standardised scales were not included in ELSA for osteoarthritis and cataract, so assessment of illness burden for these two conditions was based on attributed symptoms which were not specific for osteoarthritis and cataract
- The study used self-reported data collected using an extensively tested structured questionnaire, but no information from medical records was collected
- An analysis of pooled data from 4 waves of ELSA was used to maximise the sample size, and the main finding that less wealthy participants are relatively underdiagnosed requires validation in a larger longitudinal study.

## Main text

### Introduction

Poverty is associated with poor health, poor access to health care and poor health outcomes in many countries and across different health care systems<sup>1-3</sup>. Much of this variation is caused by recognised broad social determinants of health<sup>4</sup>. Considerable political effort has been directed at attempts to narrow health inequalities by reducing poverty and social exclusion. However, as health care has become more effective at improving health, its potential contribution to ameliorating health inequalities has increased. McKeown demonstrated in the 1970s that health services had contributed little to health improvement<sup>5</sup>, but the same claim could not be made today. The past 30 years have seen the introduction of a wide range of effective interventions, particularly for the prevention and management of chronic disease<sup>6</sup>. Yet although these new interventions improve health, they are not necessarily applied equally across the population. Health inequalities will widen if effective services are offered, or taken up, with greater frequency by wealthier than less wealthy people. The reverse is also true, however, and there is an opportunity for healthcare to reduce social inequalities if it reaches those most in need<sup>7</sup>.

Little is known about pathways into poor health. The National Health Service provides medical care free at point-of-need to all UK residents, but there is scope for inequalities to occur in the pathway from identification of early symptoms through diagnosis and on to effective treatment. Individuals in more deprived social groups may be more reluctant to present to doctors with their symptoms and so may not receive a diagnosis<sup>8,9</sup>. Diagnosis is a key step that has meaning for both patient and physician in all health systems, and 'diagnostic confusion' may act as a barrier to health care for vulnerable populations<sup>10,8,11</sup>. Previous studies have found socio-economic variation in either diagnosis or treatment rates, but have not been able to compare inequalities in illness burden, rates of diagnosis and treatment modalities in the same population<sup>12-14</sup>.

The English Longitudinal Study of Ageing (ELSA) provides new data that can be used to identify barriers to equitable receipt of healthcare, and constitutes a unique source of information on illness burden, self-reported medical diagnosis and treatment. Other data sources cover symptoms, or diagnosis, or treatment, but no other single source covers all three. ELSA collects data on symptoms and validated markers of common health conditions, as well as diagnosis and treatment. It also contains detailed socio-demographic information, including direct measures of personal wealth, on a sample selected to be representative of the population of England aged 50 years and older. These data can be used to compare socio-economic inequalities for several conditions, providing insight into a healthcare system with no direct financial barriers to treatment (the National Health Service in England). We aimed to assess socio-economic inequalities in the burden of illness (estimated by validated scales, biomarker, and reported symptoms) of angina, cataract, depression, diabetes and osteoarthritis, and compare them with inequalities in self-reported medical diagnosis and treatment, in order to determine whether key components of health care were received equitably.

### Methods

We obtained data from the ELSA cohort, an interview survey of a sample of the population aged 50 years or older in England. The sample was selected from households that had

1  
2  
3 previously responded to the Health Survey for England, and drawn from selected postcode  
4 sectors stratified by health authority and deprivation to be representative of adults aged 50 or  
5 more living in private households in England<sup>15</sup>. Participants are interviewed in their homes  
6 or care homes every two years about a wide range of health, economic and social topics. We  
7 used data collected from core participants who had been interviewed in any of four waves of  
8 ELSA from wave 2 in 2004-5 until wave 5 in 2010-11. Wave 2 was the first wave to include  
9 questions on receipt of quality-indicated healthcare, and information was not collected on  
10 every variable in every wave. Ethical approval was received from the London Multi-Centre  
11 Research Ethics Committee. We studied five common and important long-term conditions:  
12 angina, diabetes, depression, osteoarthritis, and cataract. Effective treatment is freely  
13 available for all five conditions from the National Health Service.  
14  
15

### 16 Variables

17 We collected data on illness burden, self-reported medical diagnosis and treatment of angina,  
18 cataract, depression, diabetes and osteoarthritis. The illness burden for angina was defined as  
19 grade 2 on the Rose Angina scale (pain or discomfort in chest when walking at an ordinary  
20 pace on the level on most occasions or more often, which makes subject stop or slow down if  
21 occurs while walking, and which then goes away within 10 minutes, and which includes  
22 either sternum (any level), or left arm and left anterior chest). Illness burden for diabetes was  
23 defined as a fasting HbA1c level of >7.5%<sup>16</sup>. Illness burden for depression was defined as a  
24 score of 3 or more on the eight-item Centre for Epidemiologic Studies Depression Scale  
25 (CES-D). The application of these standardised scales in ELSA has been described  
26 previously<sup>1</sup>. Illness burden for osteoarthritis was defined as self-reported pain in the hip or  
27 knee of 5 or more on a scale of 0 to 10<sup>17</sup>. Illness burden for cataract was defined broadly as  
28 reporting poor vision or blindness. Cataract is responsible for about a quarter of poor vision  
29 in the UK, so this measure is the least specific and includes those with other causes of poor  
30 vision, such as age-related macular degeneration, which is responsible for about a third of  
31 poor vision<sup>18,19</sup>.  
32  
33  
34

35 A medical diagnosis was considered to exist if a participant answered 'yes' when asked  
36 whether a doctor had ever told them they had the condition of interest. For arthritis, a follow-  
37 up question asked whether they had been told they had osteoarthritis, rheumatoid or other  
38 arthritis.  
39

40 Treatment for depression and diabetes was defined by reported achievement of quality of care  
41 indicators, derived through a robust process of literature reviews, expert panel assessment and  
42 piloting<sup>20,21</sup>. For depression, the quality indicator was about receipt of treatment since the  
43 previous wave: *'if a person is diagnosed with clinical depression, then antidepressive  
44 treatment, talking treatment or electroconvulsive treatment should be offered within 2 weeks  
45 after diagnosis unless within that period the patient has improved, or unless the patient has  
46 substance abuse or dependence, in which case treatment may wait until 8 weeks after the  
47 patient is in a drug-or alcohol-free state'*. For diabetes, treatment was measurement of  
48 glycosylated haemoglobin or fructosamine levels in the preceding 12 months. Treatment for  
49 angina was defined as ever being offered or currently taking beta-blockers (ELSA variables  
50 hebeta or hebetc). Treatment for osteoarthritis and cataract were defined as reporting ever  
51 having had surgery for the condition. For osteoarthritis this excluded those with hips or knees  
52 replaced due to fracture. Data on hip and knee replacements were only available for  
53 respondents aged 60 and over, and so respondents aged less than 60 years (n= 3,186) were  
54 excluded from the analysis of osteoarthritis.  
55  
56  
57  
58  
59  
60

Wealth was defined as the sum of financial, physical and housing wealth plus state and private pension income. Age was categorised into three groups, 50-59 years, 60-74 years and 75 years and older.

### Analysis

We used two approaches to analysis, a main analysis using serial cross sectional data and then a subsidiary analysis using longitudinal data. Multivariable logistic regression analysis was used, with the outcome variables defined as one of illness burden, self-reported medical diagnosis or treatment for each of the five conditions in each cross-sectional wave (STATA statistical software version 12.1). This regression analysis was repeated for each of the four waves of ELSA from 2004 to 2011 separately and then 'overall' for all four waves combined. For the 'overall' analysis, the data were reshaped into 'long' format in Stata statistical software, with each participant having a separate record for each wave. Intra-person correlation of outcomes was accounted for using robust adjustment with Stata, with each participant's unique identifier included in the regression equation as a cluster variable. Missing data were excluded from the analyses.

The independent variables were age group, sex and slope order of inequality. We used the slope order of inequality as an independent variable to estimate the relationship between the outcome measures and the categorised measure of wealth<sup>22,23</sup>. The slope order of inequality consisted of wealth quintiles with values of 0.1, 0.3, 0.5, 0.7 and 0.9, that is, the midpoints of each quintile on a scale of zero (least wealthy) to one (most wealthy). The slope order of inequality was modelled as a continuous variable, so that the slope or coefficient of a logit linear regression line across all five quintiles represents the difference in outcome between the hypothetically wealthiest and least wealthy participant. Exponentiating this slope coefficient results in an odds ratio, which is the ratio of the odds of the outcome in the wealthiest compared with the least wealthy participant. This odds ratio is also known as a relative index of inequality<sup>22</sup>. Advantages of this method of quantifying inequality are that it includes all participants, instead of just comparing the highest and lowest quintiles, it accounts for the number of participants in each category and it provides a single overall measure of inequality.

We included all participants in the main cross sectional analysis in order to compare the distribution of illness burden in the whole population with the distributions of diagnoses and treatments in the whole population. This meant that diagnosis was assessed even in those who did not meet the criteria for 'illness burden', and treatment was assessed even in those with no diagnosis. For the subsidiary analysis using longitudinal data, we estimated the odds ratio of receiving a diagnosis by a subsequent wave only for those who had met the criteria for 'illness burden' in a previous wave, and then the likelihood of receiving treatment only for those who had received a diagnosis in a previous wave. This was a subsidiary analysis as the numbers of participants that could be followed over time in this manner was small, particularly for treatment in angina and depression.

### Results

The whole sample (n=12,765) was composed of participants aged 50 years or more who had responded to at least one wave of ELSA from 2004-5 until 2010-11. The response rate in 2004-5 was 82%.<sup>24,25</sup> In wave 5 (2010-11), ~~over half of the sample of 8,729 were women, or were aged between 60 and 74 years (Table 1).~~ Self-reported medical diagnosis for all five conditions increased as wealth decreased, for example in depression from 4% in the

1  
2  
3 wealthiest quintile to 11% in the poorest (Table 1). There was little variation between the  
4 waves for each of the five conditions (Table 2).

5  
6 The hypothetically least wealthy participant had substantially higher odds than the  
7 hypothetically most wealthy of meeting the criteria for 'illness burden' from any of the five  
8 conditions at all four time points (overall odds ratios (OR) ranged from 4.2 to 15.1) (Table 3).  
9 The least wealthy participant also had higher odds of diagnosis (ORs 1.1 to 4.5) and either no  
10 different or relatively small odds of treatment (ORs 0.9 to 2.6) (Table 3, Figure 1).  
11

12  
13 For angina, the overall odds ratio for meeting the criteria for 'illness burden' was 7.6,  
14 indicating that the hypothetically least wealthy individual was seven times more likely to  
15 have angina symptoms (defined by the Rose angina scale) than the wealthiest. The odds ratio  
16 for self-reported medical diagnosis was 4.5, suggesting that some less wealthy people with  
17 angina symptoms had not received a diagnosis of angina, as the expected odds ratio for  
18 equitably distributed diagnosis would have been 7.6. The odds ratio for treatment was 3.2,  
19 and again the expected odds ratios for equitably distributed treatment would have been 7.6.  
20 For depression, the overall odds ratio for illness burden was 6.4, for medical diagnosis was  
21 3.3, and for treatment was 2.6, again suggesting that some poorer people with symptoms of  
22 depression were less likely to have received a diagnosis or indicated health care, as the  
23 expected odds ratios for equitably distributed treatment would have been 6.4.  
24  
25

26 For diabetes, the overall odds ratio for illness burden was 4.2 and 4.0 for diagnosis,  
27 suggesting that for diabetes diagnosis was distributed equitably. However, the odds ratio for  
28 treatment was 0.9 and not statistically significantly different from 1, again suggesting that  
29 some less wealthy people with medically diagnosed diabetes had not received treatment, as  
30 the expected odds ratios for equitably distributed treatment would have been 4.2.  
31  
32

33 The subsidiary analysis calculated the odds ratios of receiving a diagnosis by a subsequent  
34 wave only for those who had met the criteria for 'illness burden' for the relevant long term  
35 condition in a previous wave; and then the likelihood of receiving treatment only for those  
36 who had received a medical diagnosis in a previous wave. The substantial inequalities in the  
37 illness burden of conditions by wealth are identical to Table 3, as expected, and subsequently  
38 the numbers of eligible participants dwindle rapidly due to the nested nature of the analysis,  
39 with some wide confidence intervals and 9 out of 10 results not statistically significant  
40 (Supplemental file 1).  
41  
42  
43  
44  
45  
46  
47  
48  
49  
50  
51  
52  
53  
54  
55  
56  
57  
58  
59  
60

**Table 1:** Characteristics of ELSA participants at wave 5 (2010-11) and self-reported medical diagnosis of angina, cataract, depression, diabetes and osteoarthritis.

|                  |         | <b>Whole sample</b> | <b>Angina</b> | <b>Cataract</b> | <b>Depression</b> | <b>Diabetes</b> | <b>Osteo-<br/>arthritis</b> |
|------------------|---------|---------------------|---------------|-----------------|-------------------|-----------------|-----------------------------|
|                  |         | <b>N</b>            | <b>%</b>      | <b>%</b>        | <b>%</b>          | <b>%</b>        | <b>%</b>                    |
| Sex              | Male    | 3,886               | 8.2           | 13.4            | 5.4               | 13.3            | 19.8                        |
|                  | Female  | 4,843               | 6.3           | 20.4            | 7.8               | 9.4             | 32.9                        |
| Age (years)      | 50-59   | 1,906               | 2.2           | 3.7             | 10.1              | 7.2             | 17.1                        |
|                  | 60-74   | 4,766               | 5.8           | 14.5            | 7.0               | 11.0            | 28.1                        |
|                  | 75+     | 2,057               | 15.0          | 36.6            | 2.9               | 15.0            | 34.1                        |
| Wealth quintile* | 1       | 1,716               | 3.4           | 13.8            | 4.1               | 6.0             | 21.5                        |
|                  | 2       | 1,714               | 4.9           | 15.5            | 5.9               | 8.0             | 24.2                        |
|                  | 3       | 1,723               | 6.6           | 20.1            | 5.7               | 11.3            | 25.7                        |
|                  | 4       | 1,716               | 8.2           | 18.6            | 6.7               | 13.6            | 31.6                        |
|                  | 5       | 1,715               | 12.9          | 19.2            | 11.5              | 16.7            | 33.1                        |
|                  | missing | 145                 | 5.5           | 9.7             | 4.8               | 9.7             | 20.0                        |
| Total            |         | 8,729               | 7.2           | 17.3            | 6.7               | 11.1            | 27.1                        |

\*1=wealthiest quintile, 5=least wealthy quintile

**Table 2.** Prevalence of illness burden, self-reported medical diagnosis, and treatment for angina, cataract, depression, diabetes and osteoarthritis in four waves of ELSA

|                                                                                                       | <b>Angina</b> | <b>Cataract</b> | <b>Depression</b> | <b>Diabetes</b> | <b>Osteoarthritis</b> |
|-------------------------------------------------------------------------------------------------------|---------------|-----------------|-------------------|-----------------|-----------------------|
|                                                                                                       | <b>N (%)</b>  | <b>N (%)</b>    | <b>N (%)</b>      | <b>N (%)</b>    | <b>N (%)</b>          |
| <b>Illness burden</b>                                                                                 |               |                 |                   |                 |                       |
| Wave 2 (2004-5)                                                                                       | 397 (4.6)     | 308 (3.5)       | 2,037 (23.4)      | 160 (1.8)       | 1,106 (12.7)          |
| Wave 3 (2006-7)                                                                                       | 300 (3.6)     | 317 (3.8)       | 1,929 (23.3)      | n/a             | 917 (11.1)            |
| Wave 4 (2008-9)                                                                                       | 300 (3.1)     | 331 (3.5)       | 2,049 (21.4)      | 220 (2.3)       | 1,088 (11.4)          |
| Wave 5 (2010-11)                                                                                      | 254 (2.9)     | 320 (3.7)       | 1,956 (22.4)      | n/a             | 1,046 (12.0)          |
| <b>Medical diagnosis</b>                                                                              |               |                 |                   |                 |                       |
| Wave 2 (2004-5)                                                                                       | 668 (7.6)     | 1,050 (12.1)    | 402 (4.6)         | 715 (8.2)       | 1,861 (21.4)          |
| Wave 3 (2006-7)                                                                                       | 591 (7.1)     | 1,294 (15.7)    | 490 (5.9)         | 935 (11.3)      | 1,952 (23.6)          |
| Wave 4 (2008-9)                                                                                       | 645 (6.7)     | 1,421 (14.8)    | 601 (6.3)         | 1,215 (12.7)    | 2,262 (23.6)          |
| Wave 5 (2010-11)                                                                                      | 655 (7.5)     | 1,566 (17.9)    | 602 (6.9)         | 1,413 (16.2)    | 2,416 (27.7)          |
| <b>Treatment</b>                                                                                      |               |                 |                   |                 |                       |
| Wave 2 (2004-5)                                                                                       | 85 (1.0)      | 535 (6.2)       | 98 (1.1)          | 552 (6.4)       | 202 (2.3)             |
| Wave 3 (2006-7)                                                                                       | n/a           | 379 (4.9)       | n/a               | 618 (7.5)       | 141 (1.7)             |
| Wave 4 (2008-9)                                                                                       | n/a           | 444 (4.6)       | 155 (1.6)         | 671 (7.0)       | 226 (2.4)             |
| Wave 5 (2010-11)                                                                                      | 88 (1.0)      | 646 (7.4)       | n/a               | 748 (8.6)       | 208 (2.4)             |
| Total number of participants in each wave: wave 2: 8,688; wave 3: 8,268; wave 4: 9,578; wave 5: 8,729 |               |                 |                   |                 |                       |
| n/a = data not available for that condition in that wave                                              |               |                 |                   |                 |                       |

**Table 3.** Illness burden, self-reported medical diagnosis and treatment of angina, cataract, depression, diabetes and osteoarthritis, comparing the least wealthy with the most wealthy: logistic regression.

|                                       |                   | Angina                    | Cataract                  | Depression               | Diabetes                 | Osteoarthritis              |
|---------------------------------------|-------------------|---------------------------|---------------------------|--------------------------|--------------------------|-----------------------------|
| Odds ratios (95% confidence interval) |                   |                           |                           |                          |                          |                             |
| Wave 2*<br>(2004-5)                   | Illness burden    | <b>5.6</b><br>(3.8, 8.3)  | <b>7.2</b><br>(4.5, 11.5) | <b>5.1</b><br>(4.3, 6.2) | <b>4.4</b><br>(2.5, 8.0) | <b>11.0</b><br>(8.1, 14.9)  |
|                                       | Medical diagnosis | <b>2.9</b><br>(2.2, 3.9)  | <b>1.3</b><br>(1.0, 1.6)  | <b>4.8</b><br>(3.3, 7.0) | <b>3.1</b><br>(2.3, 4.2) | <b>1.6</b><br>(1.3, 2.0)    |
|                                       | Treatment         | <b>2.6</b><br>(1.2, 5.7)  | <b>1.5</b><br>(1.0, 2.2)  | 0.6<br>(0.1, 2.9)        | 0.7<br>(0.3, 1.5)        | 1.1<br>(0.7, 1.9)           |
| Wave 3*<br>(2006-7)                   | Illness burden    | <b>8.7</b><br>(5.5, 13.8) | <b>8.2</b><br>(5.1, 13.1) | <b>6.9</b><br>(5.7, 8.5) |                          | <b>12.7</b><br>(9.1, 17.8)  |
|                                       | Medical diagnosis | <b>4.9</b><br>(3.6, 6.8)  | <b>1.2</b><br>(1.0, 1.5)  | 0.7<br>(0.4, 1.4)        | <b>3.4</b><br>(2.6, 4.4) | <b>0.6</b><br>(0.4, 0.8)    |
|                                       | Treatment         |                           | 1.3<br>(0.8, 1.9)         |                          | 1.2<br>(0.6, 2.4)        | 1.0<br>(0.6, 1.9)           |
| Wave 4*<br>(2008-9)                   | Illness burden    | <b>6.7</b><br>(4.2, 10.5) | <b>5.5</b><br>(3.6, 8.6)  | <b>5.9</b><br>(4.9, 7.1) | <b>3.9</b><br>(2.4, 6.4) | <b>14.0</b><br>(10.3, 19.1) |
|                                       | Medical diagnosis | <b>4.3</b><br>(3.2, 5.9)  | 1.1<br>(0.9, 1.4)         | 0.7<br>(0.4, 1.2)        | <b>3.9</b><br>(3.1, 5.1) | <b>0.6</b><br>(0.4, 0.8)    |
|                                       | Treatment         |                           | 1.1<br>(0.7, 1.6)         | <b>2.4</b><br>(1.0, 5.9) | <b>0.2</b><br>(0.1, 0.6) | 1.0<br>(0.6, 1.6)           |
| Wave 5*<br>(2010-11)                  | Illness burden    | <b>8.4</b><br>(5.1, 13.7) | <b>6.2</b><br>(3.9, 9.9)  | <b>5.9</b><br>(4.8, 7.1) |                          | <b>16.0</b><br>(11.7, 21.8) |
|                                       | Medical diagnosis | <b>5.3</b><br>(3.9, 7.3)  | <b>1.3</b><br>(1.0, 1.5)  | <b>1.7</b><br>(1.0, 2.8) | <b>4.3</b><br>(3.4, 5.4) | <b>0.6</b><br>(0.4, 0.8)    |
|                                       | Treatment         | <b>3.3</b><br>(1.5, 7.3)  | <b>1.8</b><br>(1.2, 2.6)  |                          | 0.8<br>(0.4, 1.6)        | 1.2<br>(0.7, 2.0)           |
| Overall†                              | Illness burden    | <b>7.6</b><br>(5.4, 10.8) | <b>8.0</b><br>(5.4, 11.9) | <b>6.4</b><br>(5.5, 7.5) | <b>4.2</b><br>(2.6, 6.8) | <b>15.1</b><br>(11.4, 20.0) |
|                                       | Medical diagnosis | <b>4.5</b><br>(3.3, 6.0)  | <b>1.3</b><br>(1.1, 1.5)  | <b>3.3</b><br>(2.4, 4.5) | <b>4.0</b><br>(3.1, 5.2) | 1.1<br>(0.9, 1.3)           |
|                                       | Treatment         | <b>3.2</b><br>(1.7, 6.0)  | <b>1.3</b><br>(1.0, 1.8)  | <b>2.6</b><br>(1.1, 6.1) | 0.9<br>(0.5, 1.4)        | 1.2<br>(0.8, 1.6)           |

\*Odds ratios adjusted for age group and sex

†Odds ratios adjusted for age group, sex and unique participant identifier

\*\*Analyses for osteoarthritis excluded those younger than 60 years, as data on osteoarthritis treatment were only collected in those aged 60 or over.

Statistically significant odds ratios (where the 95% confidence intervals do not include 1) before rounding to one decimal place) are shown in bold

**Figure 1.** Illness burden (in blue), self-reported medical diagnosis (in green), and treatment (in red) of angina, cataract, depression, diabetes and osteoarthritis, comparing the least wealthy with the most wealthy: Overall odds ratios (adjusted for age and sex) and 95% confidence bars: [logistic regression](#) (~~binomial regression~~)

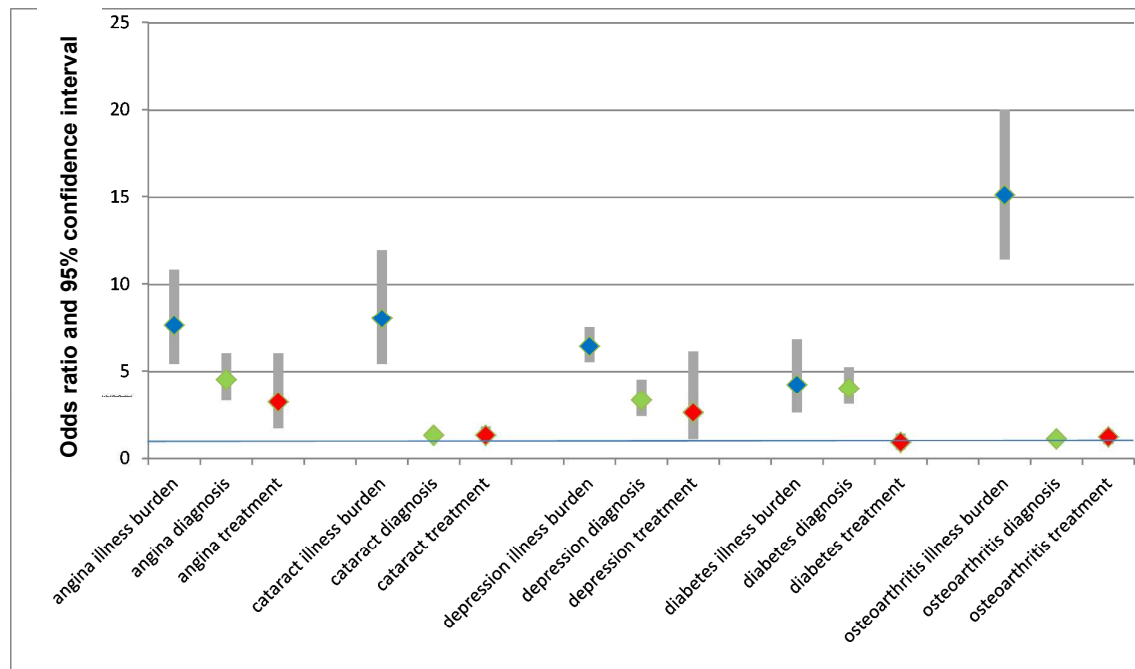

## Discussion

We found that while there were strong inverse associations between wealth and the burden of illness (based on validated scales, symptoms and biomarker) of a long-term condition, there were smaller or absent inequalities in receipt of self-reported medical diagnosis or treatment for the conditions considered. This suggests that the substantially higher illness burden in less wealthy participants was not matched by appropriately higher levels of diagnosis and treatment, and that equitable receipt of a medical diagnosis may have an important role in reducing inequalities in health.

ELSA is a unique single source of detailed ~~longitudinal~~ data on socioeconomic status and health, and this is the first study to compare inequalities in illness burden, self-reported medical diagnosis and treatment of long-term conditions in a ~~longitudinal~~ panel study over time. ELSA used robust measures of individual socio-economic position, and standardised scales and blood biomarker to assess health status. This exploratory study has some limitations and the results should be interpreted with caution and tested in subsequent research. Whilst standardised measures were used to estimate the illness burden of depression, angina and diabetes, symptoms alone were used for osteoarthritis and cataract, and the attributed symptoms were not specific for osteoarthritis and cataract. However, this lack of specificity is unlikely to vary with wealth, and so is not likely to be an important source of bias. Self-reported data may be a source of bias if self-report varies by factors other than objective health status, such as wealth or social experience. This is a recognised problem with some self-reported morbidity data, but is less of a problem with sensory assessment for



1  
2  
3 pain, which is essentially self-perceived, and where self-report is the best means of  
4 assessment<sup>26</sup>.

5  
6 We have not adjusted for health-related factors that are also more prevalent in poorer  
7 populations, such as smoking, obesity and comorbidity, because none of these are a reason  
8 for not making a diagnosis. Comorbid conditions are commoner in those with lower socio-  
9 economic status, but there is no evidence that comorbidities make a new diagnosis less likely.  
10 On the contrary, a higher number of comorbid conditions in older people may be associated  
11 with higher quality of care<sup>27</sup>. We found different patterns in different conditions, which fits  
12 with other research showing that wealth acts differently in different conditions, and for  
13 example, has no association with referral for post-menopausal bleeding<sup>28</sup>. Major national  
14 policy interventions such as the Quality and Outcomes Framework payment for performance  
15 scheme in primary care<sup>29</sup> have been associated with improved healthcare for included  
16 conditions such as angina and diabetes, more than for excluded conditions such osteoarthritis  
17 and poor vision<sup>30-32</sup>.

18  
19  
20 The serial cross-sectional analysis of 4 waves of ELSA included all eligible participants in  
21 each wave in order to maximise the sample size. This approach meant that some participants  
22 with a diagnosed condition would no longer have had symptoms or raised biomarkers, if they  
23 were being successfully treated. Examples would be diabetic participants whose blood sugar  
24 levels were being successfully controlled by treatment, and participants with successfully  
25 treated depression. We therefore checked our main results with the secondary (longitudinal)  
26 analysis, which assessed subsequent diagnosis in those had met the criteria for 'illness  
27 burden', and subsequent treatment in those with a medical diagnosis, but the number of  
28 participants who could be followed through the waves in this way was too small to allow  
29 meaningful conclusions to be drawn from the results.

30  
31  
32 Our results fit with previous findings that a greater proportion of people in deprived groups  
33 had Rose angina, but there was no difference in the proportions receiving a general  
34 practitioner diagnosis of coronary heart disease<sup>14</sup>. Care-seeking behaviour and patient  
35 preferences may differ with wealth. Given the same information, patients may want fewer  
36 medical interventions than their doctors recommend<sup>33,34</sup>, and pessimism about availability of  
37 treatment may make older people reluctant to seek help<sup>35</sup>. Older people may view living with  
38 symptoms (such as pain, or emotional problems) as a normal part of ageing<sup>36</sup>. The response  
39 of the primary care physician may also vary with the wealth of the patient. For example, the  
40 physician might be more likely to consider symptoms of breathlessness as a medical problem  
41 requiring a diagnosis, whereas aches and pains, poor vision, and low mood might be  
42 considered part of the tapestry of life, or the natural ageing process. Comorbidity is more  
43 common in deprived populations, and may make diagnosis of all conditions harder for  
44 doctors within the constraints of a short consultation<sup>37</sup>.

45  
46  
47 At a system level, the results may be partially explained by wealthier people living in areas  
48 where there are more healthcare resources. Wennberg introduced the concept of 'supply-  
49 sensitive care' to describe how the quantity of healthcare resources allocated to a particular  
50 population was a major determinant of the frequency of use of health services by that  
51 population, and gives an example in which 'a doubling of the supply of internists or  
52 cardiologists results in roughly a halving of the interval between repeat visits'<sup>38,39</sup>. Where  
53 healthcare resources are relatively plentiful, patients with chronic diseases will consult more,  
54 use more diagnostic tests, and be referred to hospital more. Further research could helpfully  
55 investigate whether those missing out on diagnosis are not accessing health services, or are  
56  
57  
58  
59  
60

1  
2  
3 seeing a doctor but not being diagnosed. The participants were selected to be nationally  
4 representative of the population of England, and so the findings are likely to be generalisable  
5 to England, but not to countries with different healthcare systems. If validated, our findings  
6 that inequalities in receipt of diagnoses are potential barriers to equitable healthcare for five  
7 common long-term conditions, suggest that future policy interventions to reduce socio-  
8 economic inequalities in healthcare should consider improving access to diagnosis as well as  
9 treatment.  
10

11  
12  
13  
14  
15 **Funding statement:** This article presents independent research commissioned by the UK  
16 National Institute for Health Research (NIHR) under the Health Services Research  
17 programme: HSR Project 10/2002/06 – ‘The dynamics of quality: a national panel study of  
18 evidence-based standards’. IL’s work was supported by the NIHR Collaboration for Applied  
19 Health Research and Care (CLAHRC) for the South West Peninsula. The views expressed in  
20 this publication are those of the authors and not necessarily those of the NHS, the NIHR or  
21 the Department of Health.  
22  
23

24 **Competing interests:** All authors have completed the ICMJE uniform disclosure form at  
25 [www.icmje.org/coi\\_disclosure.pdf](http://www.icmje.org/coi_disclosure.pdf) and declare: all authors had financial support from the  
26 National Institute for Health Research for the submitted work, DM had financial support from  
27 Age UK; no financial relationships with any organisations that might have an interest in the  
28 submitted work in the previous three years; no other relationships or activities that could  
29 appear to have influenced the submitted work.  
30  
31

32 **Ethics approval:** The English Longitudinal Study of Ageing received ethics approval from  
33 the National Research Ethics Service: 09/H0505/124. Participants gave informed consent  
34 before taking part.  
35

36 **Contributors:** NS contributed to the study design, oversaw data analysis and interpretation,  
37 and drafted the paper. NS is guarantor. AH undertook data preparation, analysis and  
38 interpretation, and contributed to drafting the paper. LM undertook data preparation and  
39 analysis. MB and AC advised on statistical techniques. SR, JC and IL advised on data  
40 analysis and interpretation. DM contributed to the study design and advised on data analysis  
41 and interpretation. All authors contributed to data interpretation and revised the paper  
42 critically.  
43  
44

45 **Acknowledgements:** Dave Stott and Amander Wellings, representatives of Public and  
46 Patient Involvement in Research (PPIRes), brought a helpful lay perspective to this research.  
47

48 **Data sharing:** The ELSA dataset and technical documentation are available from the UK  
49 Data Service at: <http://discover.ukdataservice.ac.uk/catalogue?sn=5050>.  
50  
51  
52  
53  
54  
55  
56  
57  
58  
59  
60

## Reference List

- 1  
2  
3  
4  
5 (1) Marmot M, Banks J, Blundell R, Lessof C, Nazroo J. Health, Wealth and Lifestyles of  
6 the Older Population in England: the 2002 English Longitudinal Study of Ageing.  
7 London: The Institute for Fiscal Studies; 2003.  
8
- 9  
10 (2) Börsch-Supan A, Brugiavini A, Jürges H, Mackenbach J, Siegris J, Weber G. Health,  
11 Ageing and Retirement in Europe. First Results from the Survey of Health, Ageing  
12 and Retirement in Europe. Mannheim: Mannheim Research Institute for the  
13 Economics of Aging (MEA); 2005.  
14
- 15 (3) Hemingway H, Shipley M, Macfarlane P, Marmot M. Impact of socioeconomic status  
16 on coronary mortality in people with symptoms, electrocardiographic abnormalities,  
17 both or neither: the original Whitehall study 25 year follow up. *J Epidemiol  
18 Community Health* 2000; 54(7):510-516.  
19
- 20 (4) Wilkinson R, Marmot M. Social determinants of health: the solid facts. 2nd edition  
21 ed. Copenhagen: World Health Organisation; 2003.  
22
- 23 (5) McKeown T. The role of medicine: dream, mirage or nemesis? 1 ed. London:  
24 Nuffield Principal Hospital Trust; 1976.  
25
- 26 (6) Bunker JP. The role of medical care in contributing to health improvements within  
27 societies. *Int J Epidemiol* 2001; 30(6):1260-1263.  
28
- 29 (7) Watt G. The inverse care law today. *Lancet* 2002; 360:252-4.  
30
- 31 (8) Richards HM, Reid ME, Watt GCM. Socioeconomic variations in responses to chest  
32 pain: qualitative study. *BMJ* 2002; 324(7349):1308.  
33
- 34 (9) Gardner K, Chapple A. Barriers to referral in patients with angina: qualitative study.  
35 *BMJ* 1999; 319(7207):418-421.  
36
- 37 (10) Berger J, Mohr J. A fortunate man: the story of a country doctor. London: Penguin;  
38 1967.  
39
- 40 (11) Tod AM, Read C, Lacey A, Abbott J. Barriers to uptake of services for coronary heart  
41 disease: qualitative. *BMJ* 2001; 323(7306):214.  
42
- 43 (12) Chaturvedi N, Ben Shlomo Y. From the surgery to the surgeon: does deprivation  
44 influence consultation and operation rates? *Br J Gen Pract* 1995; 45(392):127-131.  
45
- 46 (13) Mahomed NN, Barrett JA, Katz JN, Phillips CB, Losina E, Lew RA et al. Rates and  
47 outcomes of primary and revision total hip replacement in the United States medicare  
48 population. *J Bone Joint Surg Am* 2003; 85-A(1):27-32.  
49
- 50 (14) Richards H, McConnachie A, Morrison C, Murray K, Watt G. Social and gender  
51 variation in the prevalence, presentation and general practitioner provisional diagnosis  
52 of chest pain. *J Epidemiol Community Health* 2000; 54(9):714-718.  
53
- 54 (15) Natcen Social Research. English Longitudinal Study of Ageing (ELSA) Wave One to  
55 Wave Five User Guide. <http://www.esds.ac>  
56  
57  
58  
59  
60

uk/doc/5050/mrdoc/pdf/5050\_User\_Guide\_to\_the\_ELSA\_Datasets\_Waves\_1\_to\_5  
pdf [ 2012 [cited 2013 Sept. 28];

- (16) Scholes S, Taylor R, Cheshire H, Cox K, Lessof C. Retirement, health and relationships of the older population in England: The 2004 English Longitudinal Study of Ageing. Technical Report P2808. London: National Centre for Social Research; 2008.
- (17) Steel N, Melzer D, Gardener E, McWilliams B. Need for and receipt of hip and knee replacement--a national population survey. *Rheumatology* 2006;(45):1437-1441.
- (18) Evans JR, Fletcher AE, Wormald RPL, Siu-Woon Ng E, Sterling S, Smeeth L et al. Prevalence of partial sight and blindness in people aged 75 years and older in Britain: results from the MRC trial of assessment and management of older people in the community. *Br J Ophthalmol* 2002; 86:795-800.
- (19) Congdon N, O'Colmain B, Klaver CCW, Klein R, Munoz B, Friedman DS et al. Causes and Prevalence of Partial sight and blindness among adults in the United States. *Arch Ophthalmol* 2004; 122:477-485.
- (20) Steel N, Melzer D, Shekelle PG, Wenger NS, Forsyth D, McWilliams BC. Developing quality indicators for older adults: transfer from the USA to the UK is feasible. *Quality and Safety in Health Care* 2004; 13(4):260-264.
- (21) Steel N, Bachmann M, Maisey S, Shekelle P, Breeze E, Marmot M et al. Self reported receipt of care consistent with 32 quality indicators: National population survey of adults aged 50 or more in England. *BMJ* 2008; 337:a957.
- (22) Wagstaff A, Paci P, Van Doorslaer E. On the measurement of inequalities in health. *Soc Sci Med* 1991; 33(5):545-557.
- (23) Bachmann MO, Eachus J, Hopper CD, Davey SG, Propper C, Pearson NJ et al. Socio-economic inequalities in diabetes complications, control, attitudes and health service use: a cross-sectional study. *Diabet Med* 2003; 20(11):921-929.
- (24) Banks J, Breeze E, Lessof C, Nazroo J. Retirement, health and relationships of the older population in England: The 2004 English Longitudinal Study of Ageing (Wave 2). London: The Institute for Fiscal Studies; 2006.
- (25) Cheshire H, Hussey D, Medina J, Pickering K, Wood N, Ward K et al. Financial circumstances, health and well-being of the older population in England: The 2008 English Longitudinal Study of Ageing. Wave 4 Technical Report. London: National Centre for Social Research; 2012.
- (26) Sen A. Health: perception versus observation. *BMJ* 2002; 324(7342):860-861.
- (27) Min LC, Reuben DB, MacLean CH, Shekelle PG, Solomon DH, Higashi T et al. Predictors of Overall Quality of Care Provided to Vulnerable Older People. *J Am Geriatr Soc* 2005; 53(10):1705-1711.
- (28) McBride D, Hardoon S, Walters K, Gilmour S, Raine R. Explaining variation in referral from primary to secondary care: cohort study. *BMJ* 2010; 341.

- 1  
2  
3 (29) NHS Employers and the General Practitioners Committee. Quality and Outcomes  
4 Framework for 2012/13. Guidance for PCOs and practices. London: NHS Employers;  
5 2012.  
6  
7 (30) Gillam S, Steel N. The Quality and Outcomes Framework: where next? BMJ 2013;  
8 346.  
9  
10 (31) Gillam SJ, Siriwardena AN, Steel N. Pay-for-Performance in the United Kingdom:  
11 Impact of the Quality and Outcomes Framework - A Systematic Review. The Annals  
12 of Family Medicine 2012; 10(5):461-468.  
13  
14 (32) Steel N, Maisey S, Clark A, Fleetcroft R, Howe A. Quality of clinical primary care  
15 and targeted incentive payments: an observational study. Br J Gen Pract  
16 2007;(57):449-454.  
17  
18 (33) Steel N. Thresholds for taking antihypertensive drugs in different professional and lay  
19 groups: questionnaire survey. BMJ 2000; 320:1446-7.  
20  
21 (34) Montgomery AA, Fahey T. How do patients' treatment preferences compare with  
22 those of clinicians? Quality in health care 2001; 10 (Suppl I):i39-i43.  
23  
24 (35) Sanders C, Donovan JL, Dieppe PA. Unmet need for joint replacement: a qualitative  
25 investigation of barriers to treatment among individuals with severe pain and  
26 disability of the hip and knee. Rheumatology 2004; 43(3):353-357.  
27  
28 (36) Murray J, Banerjee S, Byng R, Tylee A, Bhugra D, Macdonald A. Primary care  
29 professionals' perceptions of depression in older people: a qualitative study. Social  
30 Science & Medicine 2006; 63:1363-73.  
31  
32 (37) Mercer SW, Guthrie B, Furler J, Watt G, Tudor Hart J. Multimorbidity and the  
33 inverse care law in primary care. BMJ 2012; 344.  
34  
35 (38) Wennberg JE. Understanding Geographic Variations in Health Care Delivery. The  
36 New England Journal of Medicine 1999; 340(1):52-53.  
37  
38 (39) Wennberg JE. Unwarranted variations in healthcare delivery: implications for  
39 academic medical centres. BMJ 2002; 325(7370):961-964.  
40  
41  
42  
43  
44  
45  
46  
47  
48  
49  
50  
51  
52  
53  
54  
55  
56  
57  
58  
59  
60

1  
2  
3  
4  
5  
6  
7  
8  
9  
10  
11  
12  
13  
14  
15  
16  
17  
18  
19  
20  
21  
22  
23  
24  
25  
26  
27  
28  
29  
30  
31  
32  
33  
34  
35  
36  
37  
38  
39  
40  
41  
42  
43  
44  
45  
46  
47  
48  
49  
50  
51  
52  
53  
54  
55  
56  
57  
58  
59  
60



90x139mm (300 x 300 DPI)

## Supplemental file 1

**Supplemental Table 1.** Odds ratios for meeting the ‘illness burden’ criteria for angina, cataract, depression, diabetes and osteoarthritis, medical diagnosis for those estimated to have a condition, and treatment for those with a diagnosis, comparing the least wealthy with the most wealthy: binomial regression

| Condition      | Adjusted odds ratios* (95% CI) |                                  |                       |                 |
|----------------|--------------------------------|----------------------------------|-----------------------|-----------------|
|                | Illness burden<br>(Wave 3)     | Medical<br>diagnosis<br>(Wave 4) | Treatment<br>(Wave 5) | N in treatment† |
| Angina         | <b>8.7</b> (5.5, 13.8)         | 1.4 (0.5, 4.0)                   | 1.6 (0.3, 9.0)        | 11              |
| Cataract       | <b>8.2</b> (5.1, 13.1)         | 1.0 (0.3, 3.1)                   | <b>2.2</b> (1.2, 3.8) | 83              |
| Osteoarthritis | <b>12.7</b> (9.1, 17.8)        | 0.7 (0.3, 1.6)                   | 0.7 (0.3, 1.6)        | 30              |
|                | Adjusted odds ratios* (95% CI) |                                  |                       |                 |
|                | Illness burden<br>(Wave 2)     | Medical<br>diagnosis<br>(Wave 3) | Treatment<br>(Wave 4) | N in treatment† |
| Depression     | <b>5.1</b> (4.3, 6.2)          | 0.4 (0.1, 1.4)                   | 17.3 (0.5, 604)       | 12              |
| Diabetes       | <b>4.4</b> (2.5, 8.0)          | 0.1 (0.0, 3.6)                   | 0.5 (0.2, 1.1)        | 99              |

\*adjusted for age group and sex

†followed through the waves

Waves used in analysis were the most recent with available data

Odds ratios where the 95% confidence intervals do not include 1 (before rounding to one decimal place) are shown in bold

STROBE 2007 (v4) Statement—Checklist of items that should be included in reports of *cross-sectional studies*

| Section/Topic                | Item # | Recommendation                                                                                                                                                                       | Reported on page # |
|------------------------------|--------|--------------------------------------------------------------------------------------------------------------------------------------------------------------------------------------|--------------------|
| Title and abstract           | 1      | (a) Indicate the study's design with a commonly used term in the title or the abstract                                                                                               | 1&2                |
|                              |        | (b) Provide in the abstract an informative and balanced summary of what was done and what was found                                                                                  | 2                  |
| <b>Introduction</b>          |        |                                                                                                                                                                                      |                    |
| Background/rationale         | 2      | Explain the scientific background and rationale for the investigation being reported                                                                                                 | 4                  |
| Objectives                   | 3      | State specific objectives, including any prespecified hypotheses                                                                                                                     | 4                  |
| <b>Methods</b>               |        |                                                                                                                                                                                      |                    |
| Study design                 | 4      | Present key elements of study design early in the paper                                                                                                                              | 4-6                |
| Setting                      | 5      | Describe the setting, locations, and relevant dates, including periods of recruitment, exposure, follow-up, and data collection                                                      | 4-5                |
| Participants                 | 6      | (a) Give the eligibility criteria, and the sources and methods of selection of participants                                                                                          | 4-6                |
| Variables                    | 7      | Clearly define all outcomes, exposures, predictors, potential confounders, and effect modifiers. Give diagnostic criteria, if applicable                                             | 5                  |
| Data sources/<br>measurement | 8*     | For each variable of interest, give sources of data and details of methods of assessment (measurement). Describe comparability of assessment methods if there is more than one group | 5                  |
| Bias                         | 9      | Describe any efforts to address potential sources of bias                                                                                                                            | 6                  |
| Study size                   | 10     | Explain how the study size was arrived at                                                                                                                                            | 6                  |
| Quantitative variables       | 11     | Explain how quantitative variables were handled in the analyses. If applicable, describe which groupings were chosen and why                                                         | 6                  |
| Statistical methods          | 12     | (a) Describe all statistical methods, including those used to control for confounding                                                                                                | 6                  |
|                              |        | (b) Describe any methods used to examine subgroups and interactions                                                                                                                  | 6                  |
|                              |        | (c) Explain how missing data were addressed                                                                                                                                          | 6                  |
|                              |        | (d) If applicable, describe analytical methods taking account of sampling strategy                                                                                                   | 6                  |
|                              |        | (e) Describe any sensitivity analyses                                                                                                                                                | 6                  |
| <b>Results</b>               |        |                                                                                                                                                                                      |                    |



|                          |     |                                                                                                                                                                                                              |       |
|--------------------------|-----|--------------------------------------------------------------------------------------------------------------------------------------------------------------------------------------------------------------|-------|
| Participants             | 13* | (a) Report numbers of individuals at each stage of study—eg numbers potentially eligible, examined for eligibility, confirmed eligible, included in the study, completing follow-up, and analysed            | 6-8   |
|                          |     | (b) Give reasons for non-participation at each stage                                                                                                                                                         | 6-8   |
|                          |     | (c) Consider use of a flow diagram                                                                                                                                                                           |       |
| Descriptive data         | 14* | (a) Give characteristics of study participants (eg demographic, clinical, social) and information on exposures and potential confounders                                                                     | 7     |
|                          |     | (b) Indicate number of participants with missing data for each variable of interest                                                                                                                          |       |
| Outcome data             | 15* | Report numbers of outcome events or summary measures                                                                                                                                                         | 8     |
| Main results             | 16  | (a) Give unadjusted estimates and, if applicable, confounder-adjusted estimates and their precision (eg, 95% confidence interval). Make clear which confounders were adjusted for and why they were included | 7-9   |
|                          |     | (b) Report category boundaries when continuous variables were categorized                                                                                                                                    | 7     |
|                          |     | (c) If relevant, consider translating estimates of relative risk into absolute risk for a meaningful time period                                                                                             |       |
| Other analyses           | 17  | Report other analyses done—eg analyses of subgroups and interactions, and sensitivity analyses                                                                                                               | 7     |
| <b>Discussion</b>        |     |                                                                                                                                                                                                              |       |
| Key results              | 18  | Summarise key results with reference to study objectives                                                                                                                                                     | 10    |
| Limitations              | 19  | Discuss limitations of the study, taking into account sources of potential bias or imprecision. Discuss both direction and magnitude of any potential bias                                                   | 10-11 |
| Interpretation           | 20  | Give a cautious overall interpretation of results considering objectives, limitations, multiplicity of analyses, results from similar studies, and other relevant evidence                                   | 11    |
| Generalisability         | 21  | Discuss the generalisability (external validity) of the study results                                                                                                                                        | 11-12 |
| <b>Other information</b> |     |                                                                                                                                                                                                              |       |
| Funding                  | 22  | Give the source of funding and the role of the funders for the present study and, if applicable, for the original study on which the present article is based                                                | 12    |

\*Give information separately for cases and controls in case-control studies and, if applicable, for exposed and unexposed groups in cohort and cross-sectional studies.

**Note:** An Explanation and Elaboration article discusses each checklist item and gives methodological background and published examples of transparent reporting. The STROBE checklist is best used in conjunction with this article (freely available on the Web sites of PLoS Medicine at <http://www.plosmedicine.org/>, Annals of Internal Medicine at <http://www.annals.org/>, and Epidemiology at <http://www.epidem.com/>). Information on the STROBE Initiative is available at [www.strobe-statement.org](http://www.strobe-statement.org).
