# Supplementary material for: Economic inequalities in burden of illness, diagnosis and treatment of five long-term conditions in England: panel study
Source: HighWire-hosted journal article supplement (doi:10.1136/bmjopen-2014-005530), 2014-10-01
Supplement: bmjopen-2014-005530supp.pdf [file bmjopen-2014-005530supp.pdf]

## Supplemental file 1

**Supplemental Table 1.** Odds ratios for meeting the ‘illness burden’ criteria for angina, cataract, depression, diabetes and osteoarthritis, medical diagnosis for those estimated to have a condition, and treatment for those with a diagnosis, comparing the least wealthy with the most wealthy: binomial regression

| <b>Adjusted odds ratios* (95% CI)</b> |                                    |                                           |                               |                        |
|---------------------------------------|------------------------------------|-------------------------------------------|-------------------------------|------------------------|
| <b>Condition</b>                      | <b>Illness burden<br/>(Wave 3)</b> | <b>Medical<br/>diagnosis<br/>(Wave 4)</b> | <b>Treatment<br/>(Wave 5)</b> | <b>N in treatment†</b> |
| <b>Angina</b>                         | <b>8.7</b> (5.5, 13.8)             | 1.4 (0.5, 4.0)                            | 1.6 (0.3, 9.0)                | 11                     |
| <b>Cataract</b>                       | <b>8.2</b> (5.1, 13.1)             | 1.0 (0.3, 3.1)                            | <b>2.2</b> (1.2, 3.8)         | 83                     |
| <b>Osteoarthritis</b>                 | <b>12.7</b> (9.1, 17.8)            | 0.7 (0.3, 1.6)                            | 0.7 (0.3, 1.6)                | 30                     |
|                                       | <b>Illness burden<br/>(Wave 2)</b> | <b>Medical<br/>diagnosis<br/>(Wave 3)</b> | <b>Treatment<br/>(Wave 4)</b> | <b>N in treatment†</b> |
| <b>Depression</b>                     | <b>5.1</b> (4.3, 6.2)              | 0.4 (0.1, 1.4)                            | 17.3 (0.5, 604)               | 12                     |
| <b>Diabetes</b>                       | <b>4.4</b> (2.5, 8.0)              | 0.1 (0.0, 3.6)                            | 0.5 (0.2, 1.1)                | 99                     |

\*adjusted for age group and sex

†followed through the waves

Waves used in analysis were the most recent with available data

Odds ratios where the 95% confidence intervals do not include 1 (before rounding to one decimal place) are shown in bold
